# Supplementary material for: The potential role of organics in new particle formation and initial growth in the remote tropical upper troposphere
Source: Copernicus journal article supplement (doi:10.5194/acp-2020-675), 2020-07-21
Supplement: Supplementary file 1 [file acp-2020-675-supplement.pdf]

Supplemental material for

# The potential role of organics in new particle formation and initial growth in the remote tropical upper troposphere

Agnieszka Kupc<sup>1,2</sup>, Christina J. Williamson<sup>1,3</sup>, Anna L. Hodshire<sup>4</sup>, Jan Kazil<sup>1,3</sup>, Eric Ray<sup>1,3</sup>, T. Paul, Bui<sup>5</sup>, Maximilian Dollner<sup>2</sup>, Karl D. Froyd<sup>1,3</sup>, Kathryn McKain<sup>3,6</sup>, Andrew Rollins<sup>1</sup>, Gregory P. Schill<sup>1,3</sup>, Alexander Thames<sup>7</sup>, Bernadett B. Weinzierl<sup>2</sup>, Jeffrey R. Pierce<sup>4</sup> and Charles A. Brock<sup>1</sup>

<sup>1</sup>Chemical Sciences Laboratory, National Oceanic and Atmospheric Administration, Boulder, CO 80305, U.S.A

<sup>2</sup>Faculty of Physics, Aerosol Physics and Environmental Physics, University of Vienna, 1090 Vienna, Austria

<sup>3</sup>Cooperative Institute for Research in Environmental Sciences, University of Colorado, Boulder, CO 80309, U.S.A.

<sup>4</sup>Department of Atmospheric Science, Colorado State University, Fort Collins, CO 80523, USA

<sup>5</sup>Earth Science Division, NASA Ames Research Center, Moffett Field, California, USA

<sup>6</sup>Global Monitoring Laboratory, National Oceanic and Atmospheric Administration, Boulder, CO, 80305, USA

<sup>7</sup>Department of Meteorology and Atmospheric Science, Pennsylvania State University, University Park, PA, USA

Correspondence to: Agnieszka Kupc ([agnieszka.kupc@univie.ac.at](mailto:agnieszka.kupc@univie.ac.at))

## S1. The MAIA box model: binary neutral and ion-assisted nucleation

The Model of Aerosols and Ions in the Atmosphere (MAIA; Lovejoy et al., 2004; Kazil et al., 2007) describes the oxidation of SO<sub>2</sub> to gaseous H<sub>2</sub>SO<sub>4</sub>, the nucleation of neutral and negative H<sub>2</sub>SO<sub>4</sub>-H<sub>2</sub>O clusters, aerosol growth by sulfuric acid condensation/evaporation, and particle coagulation. The production rate of H<sub>2</sub>SO<sub>4</sub> is calculated assuming that the reaction of SO<sub>2</sub>+OH is the rate limiting step of the oxidation of SO<sub>2</sub> to form H<sub>2</sub>SO<sub>4</sub> (Lovejoy et al., 1996). Nucleation is described with laboratory thermochemical data for H<sub>2</sub>SO<sub>4</sub> and H<sub>2</sub>O uptake and loss by small neutral and negative clusters (Curtius et al., 2001; Lovejoy and Curtius 2001; Froyd and Lovejoy, 2003; Hanson and Lovejoy, 2006). The thermochemical data for uptake and loss of H<sub>2</sub>SO<sub>4</sub> and H<sub>2</sub>O by large sulfuric acid aerosol (>> 5 sulfuric acid molecules) originate from the liquid drop model and H<sub>2</sub>SO<sub>4</sub> and H<sub>2</sub>O vapor pressures over bulk solutions. These were calculated with a computer code (provided by S. L. Clegg, personal communication, 2007) which adopts experimental data from Giauque et al. (1960) and Clegg et al. (1994). The thermochemical data for intermediate sized particles are a smooth interpolation of the data for small and large aerosol particles. The model uses 20 linear bins in which H<sub>2</sub>SO<sub>4</sub> content increases by 1 molecule per bin, and 50 geometric bins in which H<sub>2</sub>SO<sub>4</sub> content increases by a factor of 1.45 per bin, covering a dry (312.15 K, 10% RH) particle diameter range of ~0.5–800 nm.

The model operates along trajectories with changing pressure, temperature and relative humidity (Kazil et al., 2007, Weigel et al., 2011) in the temperature range 180-320 K and the relative humidity range 1-101 %, which includes upper troposphere conditions. MAIA parametrizes the OH diurnal cycle as a half-sine centered around noon with a prescribed noon OH concentration, while setting the nighttime OH concentration to 0. The length of the daytime

period is calculated from the day of year and location. The MAIA simulations are initialized with the SO<sub>2</sub> gas phase mixing ratio, an Aitken and an accumulation mode of given geometric mean diameter, geometric standard deviation, and surface area concentration. Atmospheric ionization rates due to galactic cosmic rays are calculated as a function of latitude, altitude, and solar cycle phase by a model of energetic particle transport in the Earth's atmosphere (O'Brien, 2005). The transformation between geographic and geomagnetic coordinates is calculated with GEOPACK (<http://geo.phys.spbu.ru/~tsyganenko/modeling.html>) and the International Geomagnetic Reference Field 12 coefficients (<https://www.ngdc.noaa.gov/IAGA/vmod/igrf.html>).

### **S1.1 MAIA input data**

Measured, estimated, and calculated inputs needed to initialize the MAIA box model are given in Table S1. MAIA was configured to use Aitken and accumulation mode geometric mean diameters, standard deviation, and aerosol surface area concentrations corresponding to these two modes. Each input in Table S1 represents the initial conditions present at the start of the simulation ( $t_0$ ) and includes pre-existing background aerosol; these background particles compete with newly formed particles for condensable vapors. Hence, condensing vapor in the gas phase can contribute both to the formation of new particles and growth of the pre-existing background aerosol.

We expect the output of MAIA model to be sensitive to the temperature dependence of nucleation rates, SO<sub>2</sub> mixing ratio, OH concentration, and the pre-existing background aerosol into which the convective outflow is mixed. The variability of the simulated aerosol size distribution to various initial conditions was examined by conducting several sensitivity simulations (Table S1) on SO<sub>2</sub>, OH, size distribution (background aerosol).

MAIA does not explicitly account for the mixing of highly scavenged air detraining from convective outflow with surrounding, upper tropospheric (UT) air with a more aged aerosol (e.g., Weigel et al., 2011). We have undertaken sensitivity studies that vary the pre-existing background aerosol used as initial input parameter (Table S1). We assume volume mixing ratios of SO<sub>2</sub> between 1 and 100 ppt, which are based on ATom 4 observations for SO<sub>2</sub> and literature data for NH<sub>3</sub> and organic precursors.

Upper tropospheric OH concentrations over the remote Pacific Ocean range between 1-4.3x10<sup>6</sup> molecule cm<sup>-3</sup> as determined from in situ measurements during ATom, and are consistent with literature values (e.g. Seinfeld and Pandis, 2006). We set the OH concentration for a solar zenith angle of 0° to 3x10<sup>6</sup> molecule cm<sup>-3</sup> and parameterized the OH diurnal cycle. In MAIA OH is parameterized as a half-sine centred around noon where the mixing ratio of nighttime OH concentration is assumed to be 0 (Kazil et al., 2007; Weigel et al., 2011). The length of the daytime period is calculated for the date, altitude, latitude, and longitude of the back trajectories. The OH concentration along the trajectory and the resulting production rate of H<sub>2</sub>SO<sub>4</sub> are then calculated. We ignore possible enhanced OH due to cloud reflectivity in the vicinity of convective outflow. MAIA box model simulation results are presented in Table S4.

## S2. TOMAS model: smoothing of the simulated size distribution

We follow a top hat method for transferring mass between size sections during condensation/evaporation, as described by Stevens et al. (1996) and Hodshire et al. (2019). After a top hat representation of the distribution is constructed for each bin, then these are translated according to the analytic solution. The translated top hats are then remapped to the bins. However, it may happen that a bin will empty out into an adjacent larger bin, creating oscillations of number/mass within the diameter space. To reduce the noise created by these oscillations, we transfer mass between adjacent bins in post-processing by moving number to make the mass: number ratio in each bin equal to the geometric mean of the bin mass:number limits. This method conserves total number and mass. We do not smooth MAIA output.

An example of the smoothed and not-smoothed TOMAS size distribution and the corresponding NME values are presented in Fig.S14.

Table S1. Ranges of parameters used for sensitivity studies in MAIA box model. Values varied to match the observed size distribution in *italic*.

| Parameter                                                             |                                  | Initial value used                                                                   |
|-----------------------------------------------------------------------|----------------------------------|--------------------------------------------------------------------------------------|
| Abbreviation                                                          | Unit                             | MAIA                                                                                 |
| SO <sub>2</sub> *                                                     | pptv                             | <i>1-100</i>                                                                         |
| H <sub>2</sub> SO <sub>4</sub>                                        | molecule cm <sup>-3</sup>        | 1 x 10 <sup>3</sup>                                                                  |
| OH at solar zenith angle of 0°                                        | molecule cm <sup>-3</sup>        | 1x10 <sup>6</sup> , 3x10 <sup>6</sup> , 4.3x10 <sup>6</sup>                          |
| OH at night                                                           |                                  | 0                                                                                    |
| Ionisation rate** (ion pair production rate)                          | cm <sup>-3</sup> s <sup>-1</sup> | 95-115                                                                               |
| Time since CI                                                         | hours                            | 0.4-10.5                                                                             |
| Background pre-existing aerosol                                       |                                  |                                                                                      |
| Surface area (S <sub>area</sub> ) of the Aitken and accumulation mode | µm <sup>2</sup> cm <sup>-3</sup> | S <sub>area</sub> , S <sub>area</sub> x2, S <sub>area</sub> /2, S <sub>area</sub> =0 |
| Geometric mean diameter                                               | nm                               | Vary from case to case                                                               |

\* SO<sub>2</sub> measured on ATom 4 only

\*\* at STP: 273.15 K and 1013 hPa

Table S2. Number of simulated cases (out of total 32) for which the temperature along the trajectory was within and out-of-the temperature range of the nucleation scheme used in TOMAS model.

| Scheme | T regime, K     | No of cases within T regime of the scheme | % of cases within T regime of the scheme | No of cases below min. T of the scheme |
|--------|-----------------|-------------------------------------------|------------------------------------------|----------------------------------------|
| VEHK   | 230.15 - 305.15 | 14                                        | 44                                       | 18                                     |
| NAPA   | 240 - 300       | 7                                         | 22                                       | 25                                     |
| RIC    | 270 - 310       | 0                                         | 0                                        | 32                                     |
| DUN    | 208 - 292       | 32                                        | 100                                      | 0                                      |

VEHK: neutral binary nucleation using Vehkamäki et al. (2002) scheme

RIC: neutral nucleation with biogenic oxidation products (Riccobono et al., 2014), updated by temperature dependence according to Yu et al. (2017)

NAPA: neutral ternary nucleation (Napari et al., 2002)

DUN: ion-induced and neutral nucleation scheme (Dunne et al., 2016) with both neutral and ion-induced binary and neutral and ion-induced ternary pathways

Table S3. Number of identified cases of recent NPF associated with CI for the Atlantic between 30° N and 30° S latitude that meet the following criteria: T <260 K, CI >95%, and modal peak diameter <12 nm.

| ATom mission | Number of cases meeting criteria listed above |                         |                         |
|--------------|-----------------------------------------------|-------------------------|-------------------------|
|              | Trajectory age <1 day                         | Trajectory age 1-2 days | Trajectory age 2-3 days |
| 1            | 6                                             | 5                       | 1                       |
| 2            | 18                                            | 38                      | 41                      |
| 3            | 20                                            | 29                      | 48                      |
| 4            | 16                                            | 5                       | 17                      |
| Total        | 60                                            | 77                      | 67                      |



Table S4. Summary of the best NME results for each of the simulated cases and nucleation schemes undertaken at OH equal  $3 \times 10^6$  molec  $\text{cm}^{-3}$  along with corresponding figure number presenting detailed results. Simulation runs where other initial conditions were varied are also indicated. Best NME values of all schemes are in bold and shaded.

| Model run ID                  | Corresponding figure | Time since CI, hrs | Best NME for each of the nucleation schemes simulated |                         |             |      |       |                         |                          |                        |                                          |      |                        | Studies on additionally varied model input parameters (e.g. OH, SD, $F_{orgnuc}$ ) |               |
|-------------------------------|----------------------|--------------------|-------------------------------------------------------|-------------------------|-------------|------|-------|-------------------------|--------------------------|------------------------|------------------------------------------|------|------------------------|------------------------------------------------------------------------------------|---------------|
|                               |                      |                    | TOMAS                                                 |                         |             |      |       |                         |                          |                        |                                          |      |                        |                                                                                    | MAIA          |
| ATom2 cases                   |                      |                    | VEHK                                                  | VEHK +org <sub>gr</sub> | RIC         | NAPA | NAPAt | NAPA +org <sub>gr</sub> | NAPAt +org <sub>gr</sub> | DUN NH <sub>3</sub> =0 | DunNH <sub>3</sub> =0 +org <sub>gr</sub> | DUN  | DUN +org <sub>gr</sub> | BIN <sub>n+ch</sub>                                                                |               |
| sd486                         | Fig. 6               | 7.3                | 0.48                                                  | 0.41                    | <b>0.02</b> | 0.42 | 0.39  | 0.38                    | 0.17                     | 0.37                   | 0.30                                     | 0.34 | 0.04                   | 0.73                                                                               | Figure S46-54 |
| sd390                         | Fig. S12             | 1                  | 0.90                                                  | 0.61                    | <b>0.26</b> | 0.32 | 0.90  | 0.31                    | 0.30                     | 0.92                   | 0.92                                     | 0.49 | 0.34                   |                                                                                    |               |
| sd391                         | Fig. S13             | 0.66               | 0.94                                                  | 0.93                    | <b>0.21</b> | 0.47 | 0.94  | 0.3                     | 0.89                     | 0.94                   | 0.94                                     | 0.87 | 0.83                   |                                                                                    |               |
| sd400                         | Fig. S14             | 1.17               | 0.78                                                  | 0.29                    | <b>0.05</b> | 0.36 | 0.78  | 0.29                    | 0.29                     | 0.89                   | 0.85                                     | 0.48 | 0.10                   |                                                                                    |               |
| sd404                         | Fig. S15             | 3.5                | 0.63                                                  | 0.15                    | <b>0.06</b> | 0.33 | 0.34  | 0.15                    | 0.15                     | 0.90                   | 0.86                                     | 0.27 | 0.07                   |                                                                                    |               |
| sd446                         | Fig. S16             | 7.85               | 0.84                                                  | 0.43                    | 0.21        | 0.70 | 0.70  | 0.41                    | <b>0.09</b>              | 0.65                   | 0.55                                     | 0.60 | 0.14                   |                                                                                    |               |
| sd448                         | Fig. S17             | 9.08               | 0.47                                                  | 0.4                     | <b>0.10</b> | 0.4  | 0.47  | 0.3                     | 0.21                     | 0.34                   | 0.38                                     | 0.28 | 0.27                   |                                                                                    | Figure S59-62 |
| sd452                         | Fig. S18             | 6.55               | 0.58                                                  | 0.15                    | <b>0.11</b> | 0.42 | 0.43  | 0.13                    | 0.13                     | 0.63                   | 0.34                                     | 0.33 | 0.17                   |                                                                                    |               |
| sd461                         | Fig. S19             | 2.83               | 0.72                                                  | 0.32                    | <b>0.08</b> | 0.45 | 0.36  | 0.32                    | 0.19                     | 0.69                   | 0.13                                     | 0.30 | 0.09                   | 0.85                                                                               | Figure S55-56 |
| sd470                         | Fig. S20             | 4.5                | 0.31                                                  | 0.36                    | 0.28        | 0.31 | 0.31  | 0.31                    | 0.17                     | 0.72                   | 0.70                                     | 0.31 | <b>0.15</b>            |                                                                                    |               |
| sd477                         | Fig. S21             | 10.5               | 0.35                                                  | 0.32                    | 0.05        | 0.45 | 0.29  | 0.32                    | <b>0.02</b>              | 0.61                   | 0.45                                     | 0.29 | 0.11                   |                                                                                    | Figure S63-65 |
| sd491                         | Fig. S22             | 0.4                | 0.96                                                  | 0.91                    | <b>0.08</b> | 0.88 | 0.95  | 0.25                    | 0.64                     | 0.96                   | 0.96                                     | 0.90 | 0.59                   | 0.99                                                                               | Figure S57-60 |
| sd496                         | Fig. S23             | 1.48               | 0.77                                                  | 0.36                    | <b>0.07</b> | 0.42 | 0.73  | 0.24                    | 0.08                     | 0.96                   | 0.95                                     | 0.36 | 0.13                   |                                                                                    |               |
| sd498                         | Fig. S24             | 1.95               | 0.33                                                  | 0.11                    | 0.06        | 0.32 | 0.32  | <b>0.02</b>             | 0.06                     | 0.92                   | 0.92                                     | 0.25 | 0.14                   |                                                                                    |               |
| sd530                         | Fig. S25             | 3.72               | 0.57                                                  | 0.25                    | <b>0.13</b> | 0.57 | 0.57  | 0.25                    | 0.25                     | 0.73                   | 0.74                                     | 0.73 | 0.74                   |                                                                                    |               |
| sd533                         | Fig. S26             | 2.9                | 0.76                                                  | 0.16                    | <b>0.03</b> | 0.76 | 0.76  | 0.13                    | 0.13                     | 0.84                   | 0.53                                     | 0.84 | 0.53                   |                                                                                    |               |
| sd535                         | Fig. S27             | 1.88               | 0.66                                                  | 0.36                    | <b>0.06</b> | 0.65 | 0.65  | 0.36                    | 0.36                     | 0.91                   | 0.86                                     | 0.91 | 0.86                   |                                                                                    |               |
| sd537                         | Fig. S28             | 1.7                | 0.62                                                  | 0.34                    | 0.09        | 0.42 | 0.61  | 0.22                    | 0.28                     | 0.92                   | 0.86                                     | 0.41 | <b>0.05</b>            | 0.84                                                                               |               |
| sd540                         | Fig. S29             | 3.4                | 0.44                                                  | 0.17                    | 0.12        | 0.19 | 0.25  | 0.15                    | <b>0.09</b>              | 0.23                   | 0.34                                     | 0.21 | <b>0.09</b>            |                                                                                    |               |
| sd543                         | Fig. S30             | 0.81               | 0.92                                                  | 0.92                    | <b>0.39</b> | 0.43 | 0.92  | 0.41                    | 0.68                     | 0.92                   | 0.92                                     | 0.92 | 0.92                   |                                                                                    |               |
| <b>ATom4 cases</b>            |                      |                    |                                                       |                         |             |      |       |                         |                          |                        |                                          |      |                        |                                                                                    |               |
| sd22                          | Fig. S31             | 2.84               | 0.76                                                  | 0.75                    | <b>0.39</b> | 0.44 | 0.75  | <b>0.39</b>             | 0.66                     | 0.76                   | 0.75                                     | 0.76 | 0.75                   |                                                                                    |               |
| sd32                          | Fig. S32             | 6.55               | 0.76                                                  | 0.76                    | <b>0.34</b> | 0.45 | 0.64  | 0.39                    | 0.36                     | 0.76                   | 0.76                                     | 0.75 | 0.71                   |                                                                                    |               |
| sd72                          | Fig. S33             | 11.04              | 0.84                                                  | 0.62                    | <b>0.31</b> | 0.35 | 0.50  | 0.33                    | 0.34                     | 0.63                   | 0.62                                     | 0.63 | 0.62                   |                                                                                    |               |
| sd75                          | Fig. S34             | 11.99              | 0.79                                                  | 0.79                    | <b>0.28</b> | 0.41 | 0.70  | 0.41                    | 0.34                     | 0.79                   | 0.79                                     | 0.78 | 0.78                   |                                                                                    |               |
| sd78                          | Fig. S35             | 13.76              | 0.76                                                  | 0.76                    | 0.38        | 0.43 | 0.47  | 0.37                    | <b>0.20</b>              | 0.76                   | 0.76                                     | 0.74 | 0.74                   |                                                                                    |               |
| sd82                          | Fig. S36             | 14.57              | 0.82                                                  | 0.81                    | <b>0.07</b> | 0.44 | 0.76  | 0.26                    | 0.16                     | 0.82                   | 0.81                                     | 0.81 | 0.92                   |                                                                                    |               |
| sd132                         | Fig. S37             | 12.99              | 0.63                                                  | 0.62                    | <b>0.27</b> | 0.33 | 0.31  | 0.28                    | <b>0.27</b>              | 0.62                   | 0.62                                     | 0.37 | 0.28                   |                                                                                    |               |
| sd134                         | Fig. S38             | 13.55              | 0.61                                                  | 0.60                    | <b>0.22</b> | 0.26 | 0.26  | 0.26                    | 0.27                     | 0.60                   | 0.60                                     | 0.31 | 0.27                   |                                                                                    |               |
| sd179                         | Fig. S39             | 17.23              | 0.32                                                  | 0.36                    | <b>0.02</b> | 0.32 | 0.32  | 0.36                    | 0.10                     | 0.86                   | 0.85                                     | 0.33 | 0.09                   |                                                                                    |               |
| sd183                         | Fig. S40             | 19.39              | 0.75                                                  | 0.17                    | 1.84        | 0.37 | 0.34  | <b>0.15</b>             | <b>0.15</b>              | 0.47                   | 0.28                                     | 0.31 | 0.19                   |                                                                                    |               |
| sd186                         | Fig. S41             | 22.36              | 0.24                                                  | 0.50                    | 4.25        | 0.24 | 0.23  | 0.50                    | 0.27                     | 0.53                   | 0.52                                     | 0.22 | <b>0.08</b>            |                                                                                    |               |
| sd188                         | Fig. S42             | 23.27              | 0.66                                                  | 0.69                    | 2.12        | 0.65 | 0.25  | 0.69                    | 0.44                     | 0.19                   | 0.65                                     | 0.19 | <b>0.18</b>            |                                                                                    |               |
| Number of cases with best NME |                      |                    |                                                       |                         | 22          | 0    | 0     | 3                       | 6                        | 0                      | 0                                        |      | 5                      |                                                                                    |               |

VEHK: neutral binary nucleation using Vehkamäki et al. (2002) scheme

org<sub>gr</sub>: with organics added for initial growth

RIC: neutral nucleation with biogenic oxidation products (Riccobono et al., 2014), updated by temperature dependence according to Yu et al. (2017)

NAPA: neutral ternary nucleation (Napari et al., 2002)

NAPAt: neutral ternary nucleation (Napari et al., 2002), with a tuning factor of  $10^{-5}$

DUN: ion-induced and neutral nucleation scheme (Dunne et al., 2016) with both neutral and ion-induced binary and neutral and ion-induced ternary pathways

DUN<sub>NH3=0</sub>: ion-induced binary nucleation scheme (Dunne et al., 2016)

BIN<sub>n+ch</sub>: neutral and ion-induced binary nucleation scheme (MAIA; Lovejoy et al., 2004; Kazil et al., 2007)

Table S5. Comparison between measured SO<sub>2</sub> (ATom 4) and simulated SO<sub>2</sub> mixing ratios corresponding to for best NME values in the RIC simulations (TOMAS model).

| ATom4 case number | SO <sub>2</sub> measured, pptv | RIC                             |          |      |
|-------------------|--------------------------------|---------------------------------|----------|------|
|                   |                                | SO <sub>2</sub> simulated, pptv | Organics | NME  |
| sd22              | nd                             | 61.6                            | 100      | 0.39 |
| sd32              | nd                             | 7                               | 100      | 0.34 |
| sd72              | 8.12                           | 14.4                            | 48.3     | 0.31 |
| sd75              | 6.32                           | 11.3                            | 100      | 0.28 |
| sd78              | 4.33                           | 23.4                            | 8.9      | 0.38 |
| sd82              | 5.65                           | 18.3                            | 100      | 0.07 |
| sd132             | 3.58                           | 2.1                             | 18.3     | 0.27 |
| sd134             | 6.90                           | 1                               | 100      | 0.22 |
| sd179             | 11.29                          | 1.6                             | 8.9      | 0.02 |
| sd183             | 11.20                          | 1                               | 1        | 1.84 |
| sd186             | 8.47                           | 1                               | 100      | 4.25 |
| sd188             | 8.97                           | 1                               | 100      | 2.12 |

nd -no data

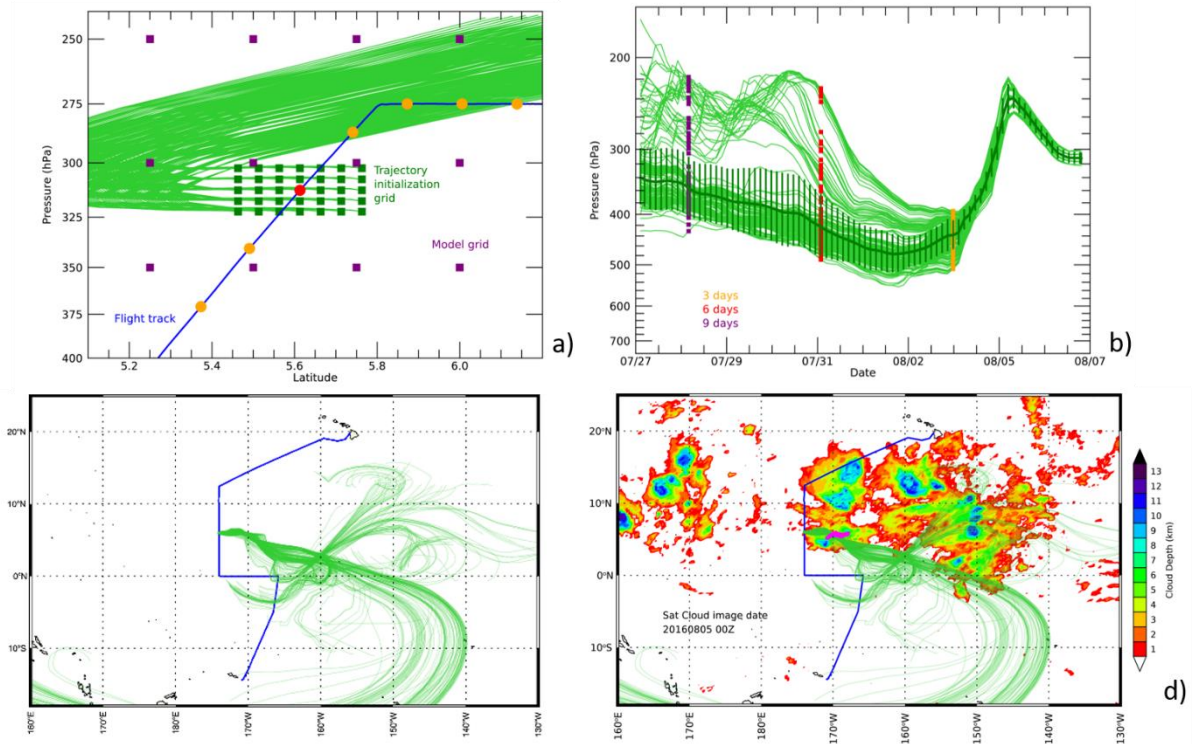

**Figure S1: Example of trajectory calculations and analysis: a) Pressure cross-section of the DC-8 flight track (blue line) showing an exemplary cluster of 245 back-trajectories initialized within a grid (grey squares;  $0.3^\circ \times 0.3^\circ \times 20$  hPa) centered around the DC-8 location every minute of flight (filled circles). The model reanalysis grid is shown by black squares. b) Pressure as a function of back-trajectory time. The back-trajectory time step is 3 hours, based on the reanalysis data. Uncertainty in the back-trajectory locations is represented by the 3-D spread in the trajectory cluster. The vertical uncertainty is estimated as the standard deviation in pressure (hPa) of the trajectory cluster at each time. c) Flight track and a cluster of back trajectories initiated at a certain minute of the flight. d) Back trajectories and cloud depths. The convective influence (CI) probability is the fraction of the 245 trajectories within each cluster that passed through a convective system with cloud depth  $>5$  km. Magenta dots represent the point of CI with a trajectory distance tolerance of  $0.15^\circ$  ( $\sim 10$ - $15$  km) from the cloud and for which the RH with respect to liquid water ( $RH_w$ ) of the trajectory was  $>50\%$ .**

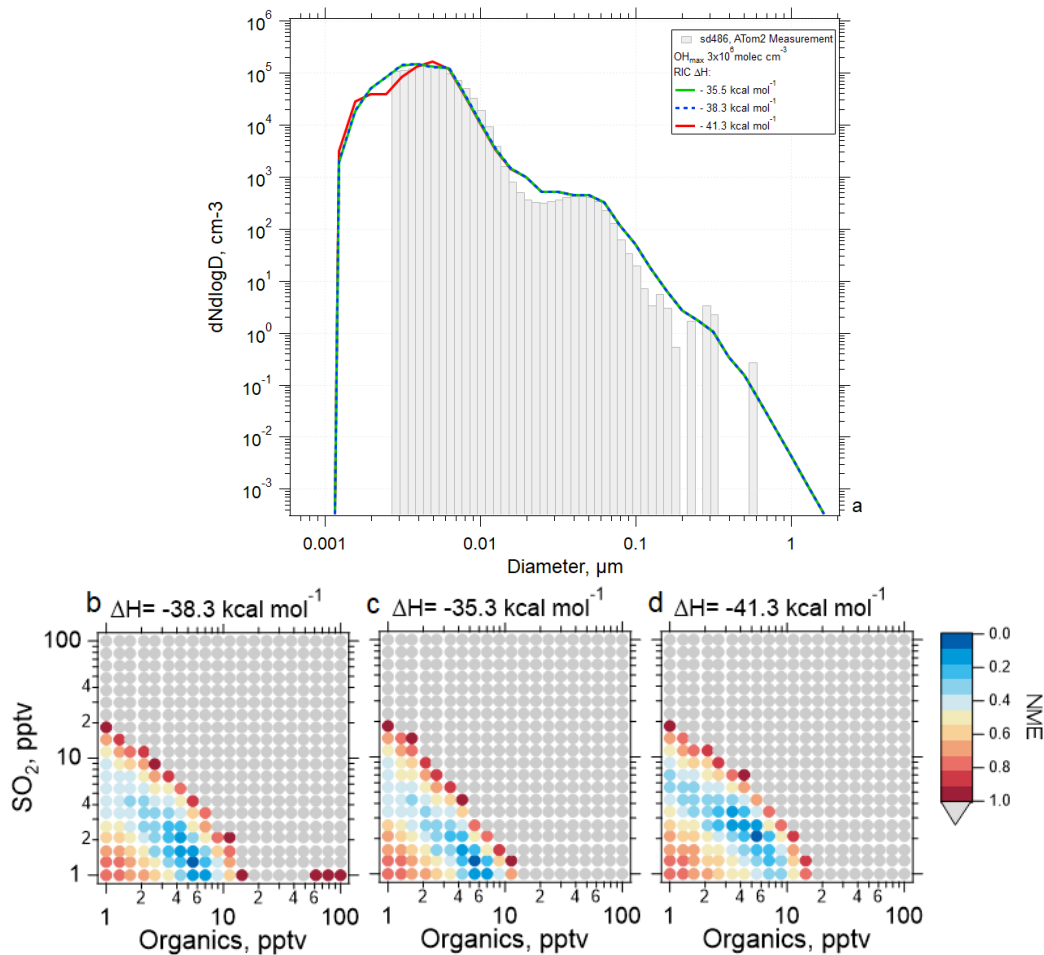

| $\Delta H$ , kcal mol <sup>-1</sup> | RIC      |                        |                |
|-------------------------------------|----------|------------------------|----------------|
|                                     | Best NME | SO <sub>2</sub> , pptv | Organics, pptv |
| sd486                               |          |                        |                |
| -35.5                               | 0.009    | 1.3                    | 5.5            |
| -38.3                               | 0.021    | 1.3                    | 5.5            |
| -41.3                               | 0.033    | 2.1                    | 5.5            |
| sd400                               |          |                        |                |
| -35.5                               | 0.0401   | 2.1                    | 78.5           |
| -38.3                               | 0.055    | 2.1                    | 78.5           |
| -41.3                               | 0.0397   | 3.4                    | 78.5           |
| sd448                               |          |                        |                |
| -35.5                               | 0.0804   | 1                      | 8.9            |
| -38.3                               | 0.102    | 1                      | 7              |
| -41.3                               | 0.112    | 1                      | 7              |
| sd496                               |          |                        |                |
| -35.5                               | 0.0407   | 7                      | 18.3           |
| -38.3                               | 0.0744   | 7                      | 18.3           |
| -41.3                               | 0.0996   | 5.5                    | 18.3           |
| sd535                               |          |                        |                |
| -35.5                               | 0.04057  | 2.1                    | 48.3           |
| -38.3                               | 0.064    | 2.1                    | 48.3           |
| -41.3                               | 0.0909   | 2.1                    | 48.3           |

Figure S2: The impact of the change of enthalpy ( $\Delta H$ ) by  $\pm 3$  kcal mole<sup>-1</sup> in the RIC scheme and case study sd486. (ATom 2, 2017-02-04, 03:05:31-03:06:30 UTC) where measurements were made 7.3 hours following convective influence, and temperature along the trajectory varied between 218 and 226 K. (a) Observed (shaded bars) and simulated (lines) aerosol size distributions for three values of  $\Delta H$  (b-d)) NME between the modeled and measured size distribution for the RIC

scheme with varying organics mixing ratios. The color of the circle indicates the value of NME corresponding to a particular initial mixing ratio of SO<sub>2</sub>, or organics that varied between 0 and 100 pptv. Blue represents the best agreement, red poorer agreement, and grey the worst (NME >1). There were 400 sensitivity tests for this scheme. The table presents the NME results for five different cases, one of them corresponds to the size distributions in panel (a) and associated initial mixing ratios of gas-phase precursors.

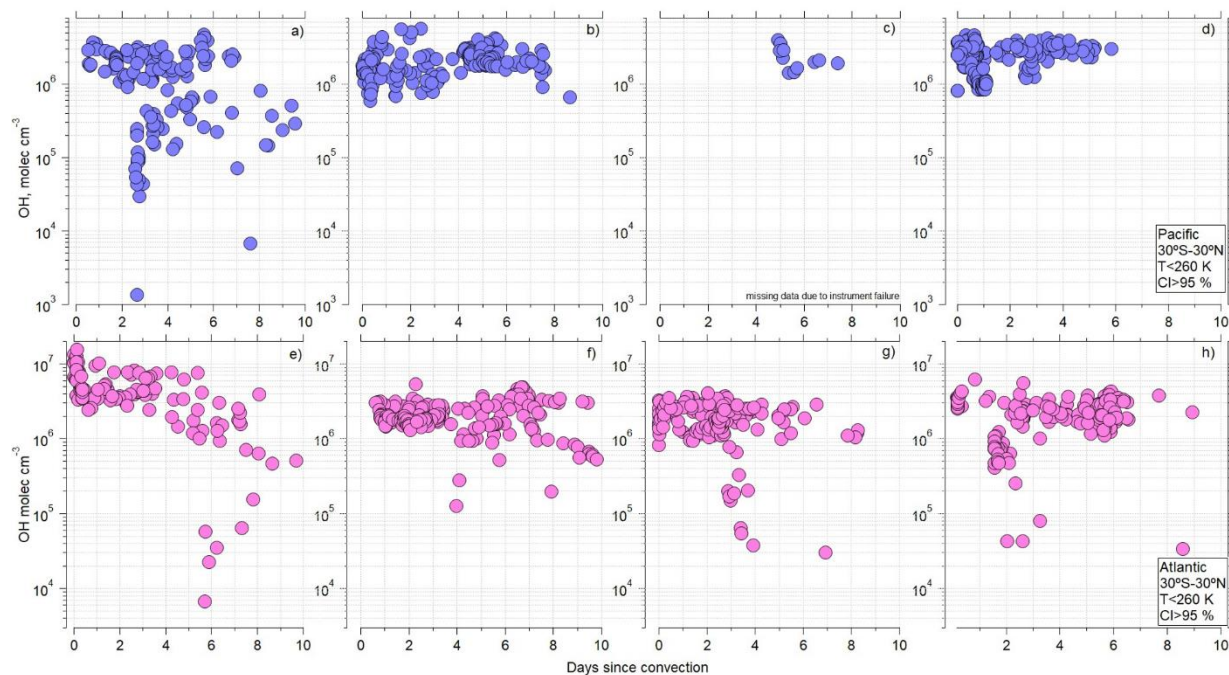

Figure S3: Measured hydroxyl radical (OH) concentration as a function of time since convective influence for ATom 1-4, over the Pacific (a-d) and the Atlantic (e-h) (30° S - 30° N), where temperature <260 K and probability of CI is >95%. If these conditions are met and an aerosol number mode with a modal peak diameter <12 nm is present within one day since CI, we consider the case for analysis by box modeling.

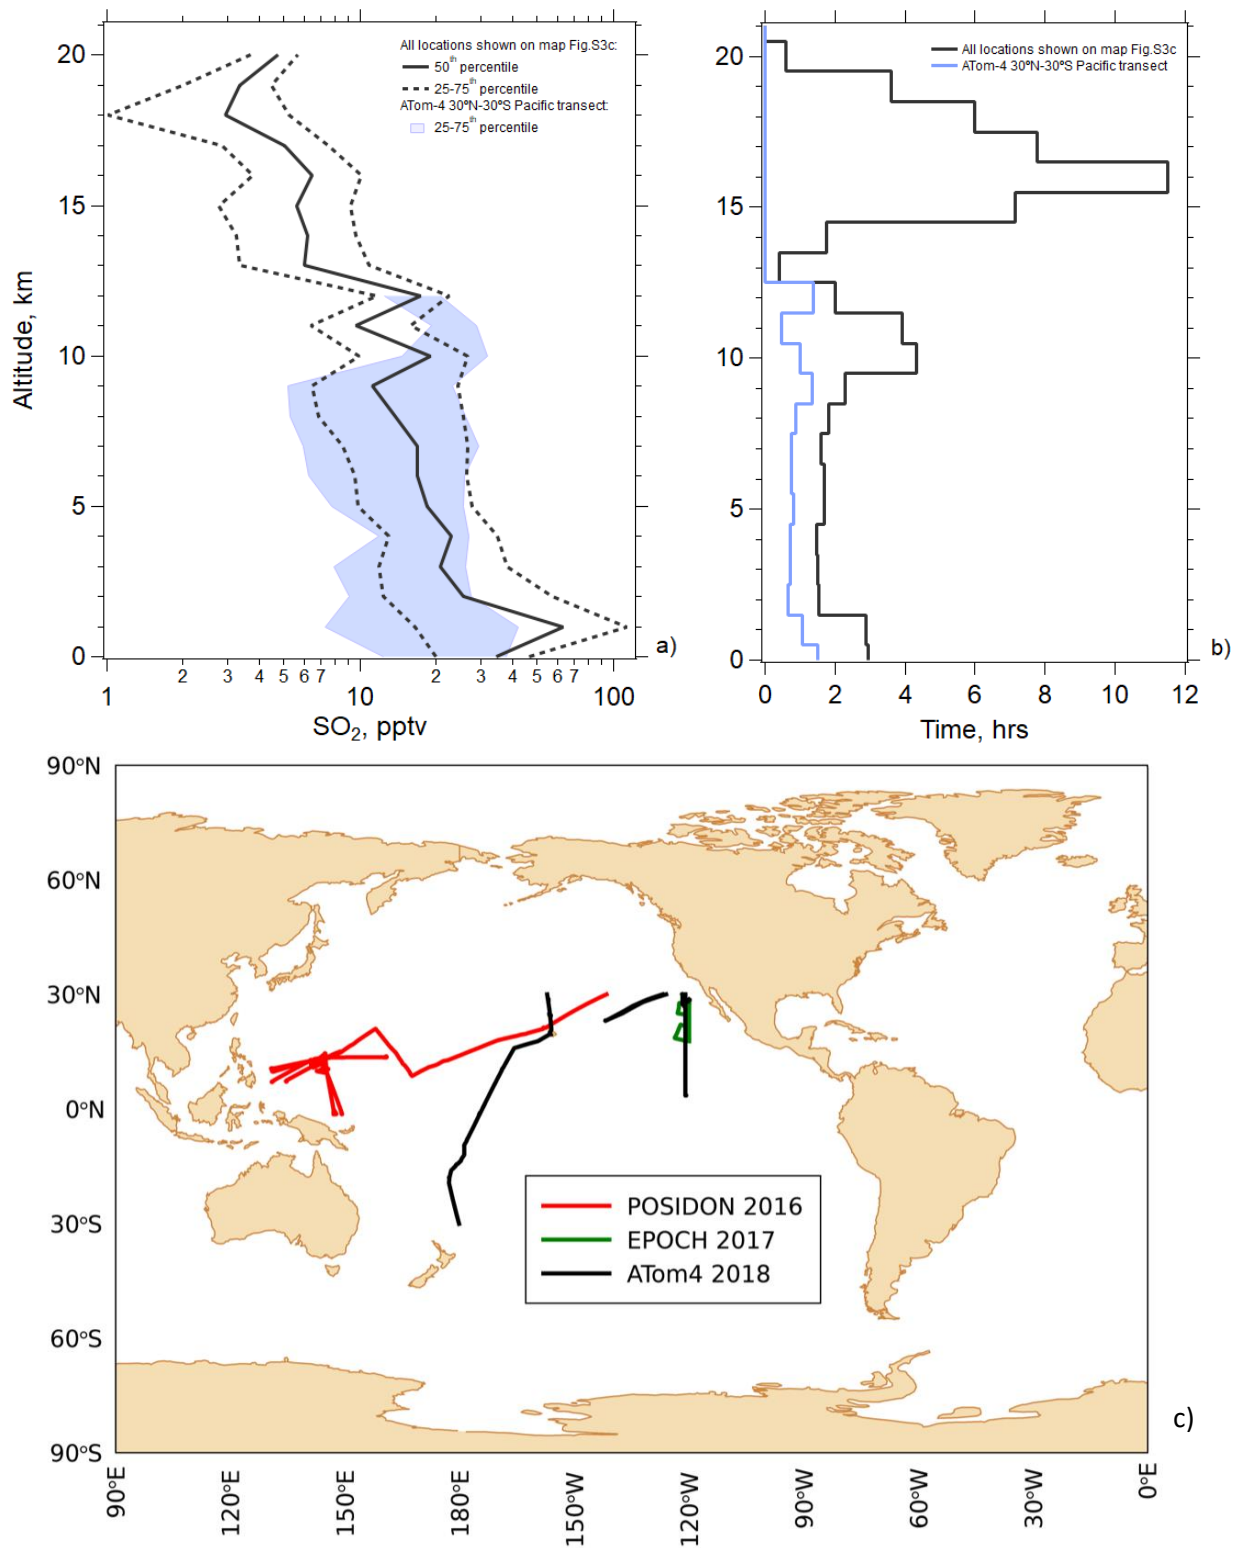

**Figure S4: SO<sub>2</sub> measurements used to constrain box model simulations. (a) Median and interquartile range of the SO<sub>2</sub> measurements from 3 missions: POSIDON (October 2016), EPOCH (August 2017), and ATom-4 (May 2018). (b) Histogram showing integrated time of measurements that contributed to (a) as a function of altitude. (c) Corresponding flight tracks.**



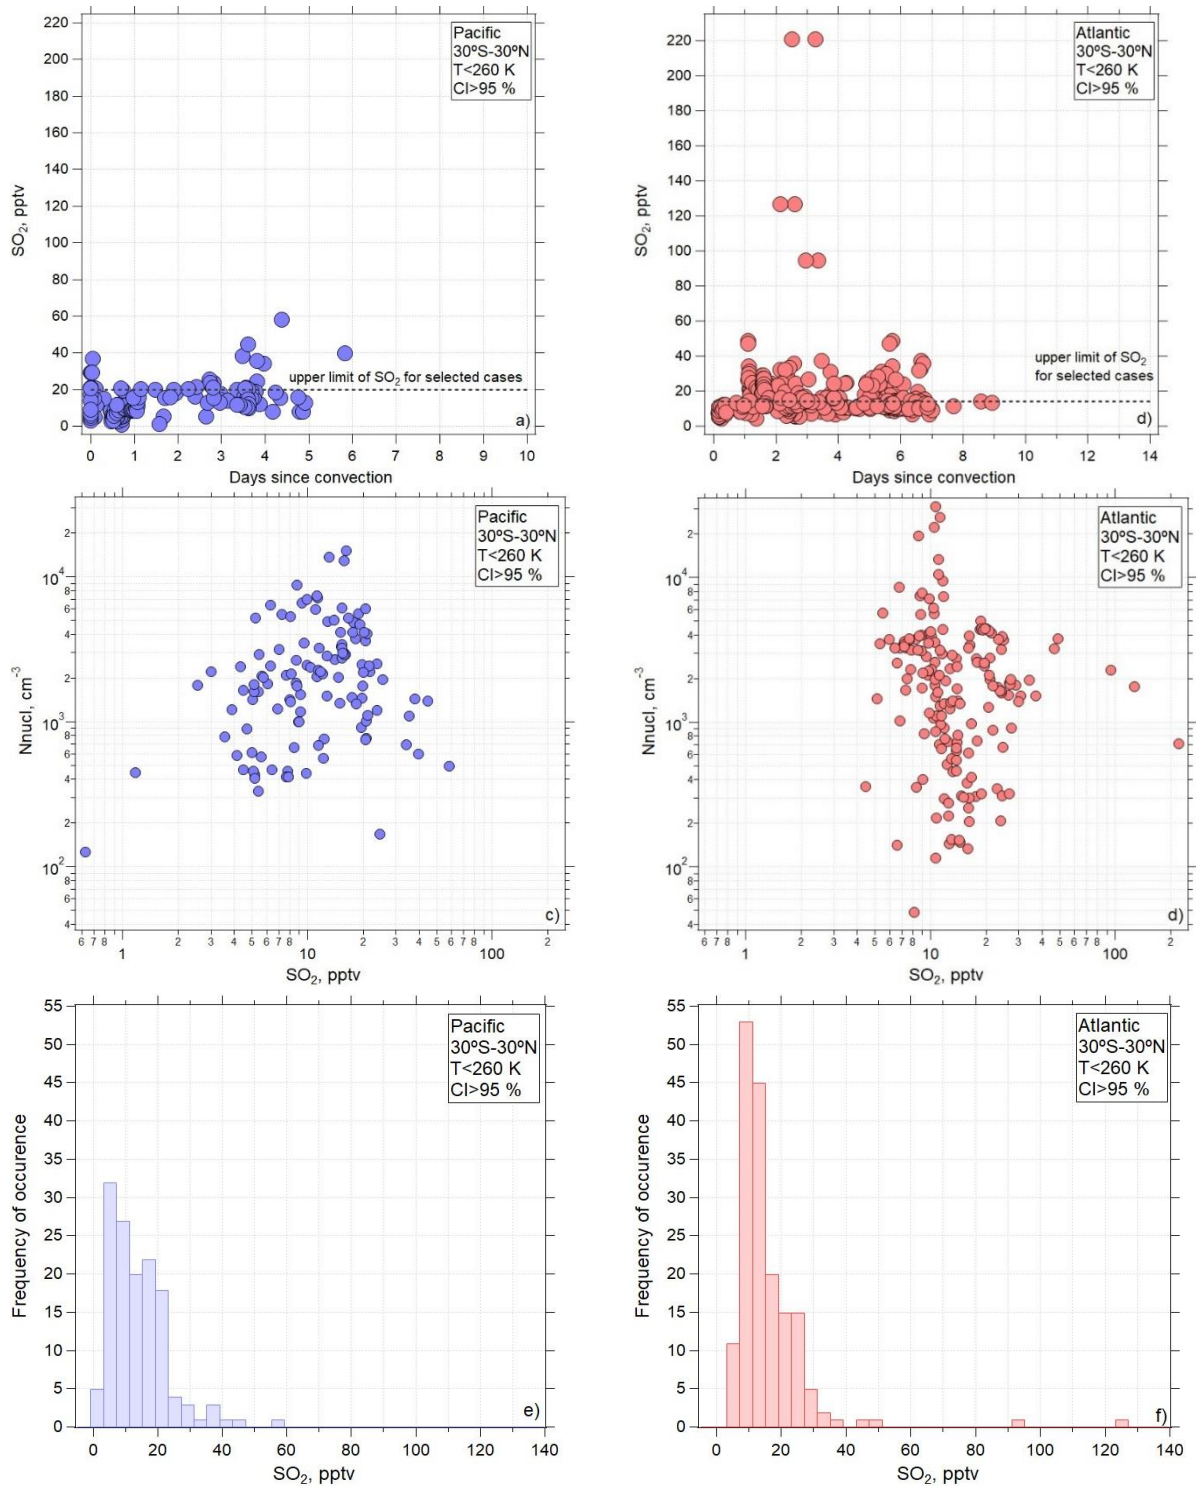

**Figure S5: SO<sub>2</sub> mixing ratios for ATom 4 Pacific (a) and Atlantic (b) flights as a function of time since convective influence. Particle number concentration of nucleation-mode particles (Nnucl; 3-12 nm) for ATom 4 Pacific (c) and Atlantic (d) as a function of SO<sub>2</sub> mixing ratio. SO<sub>2</sub> mixing ratio frequency of occurrence for ATom 4 Pacific (e) and Atlantic (f). For Pacific cases selected for simulations (within 1 day since convection), the SO<sub>2</sub> mixing ratio over Pacific does not exceed 20 pptv.**

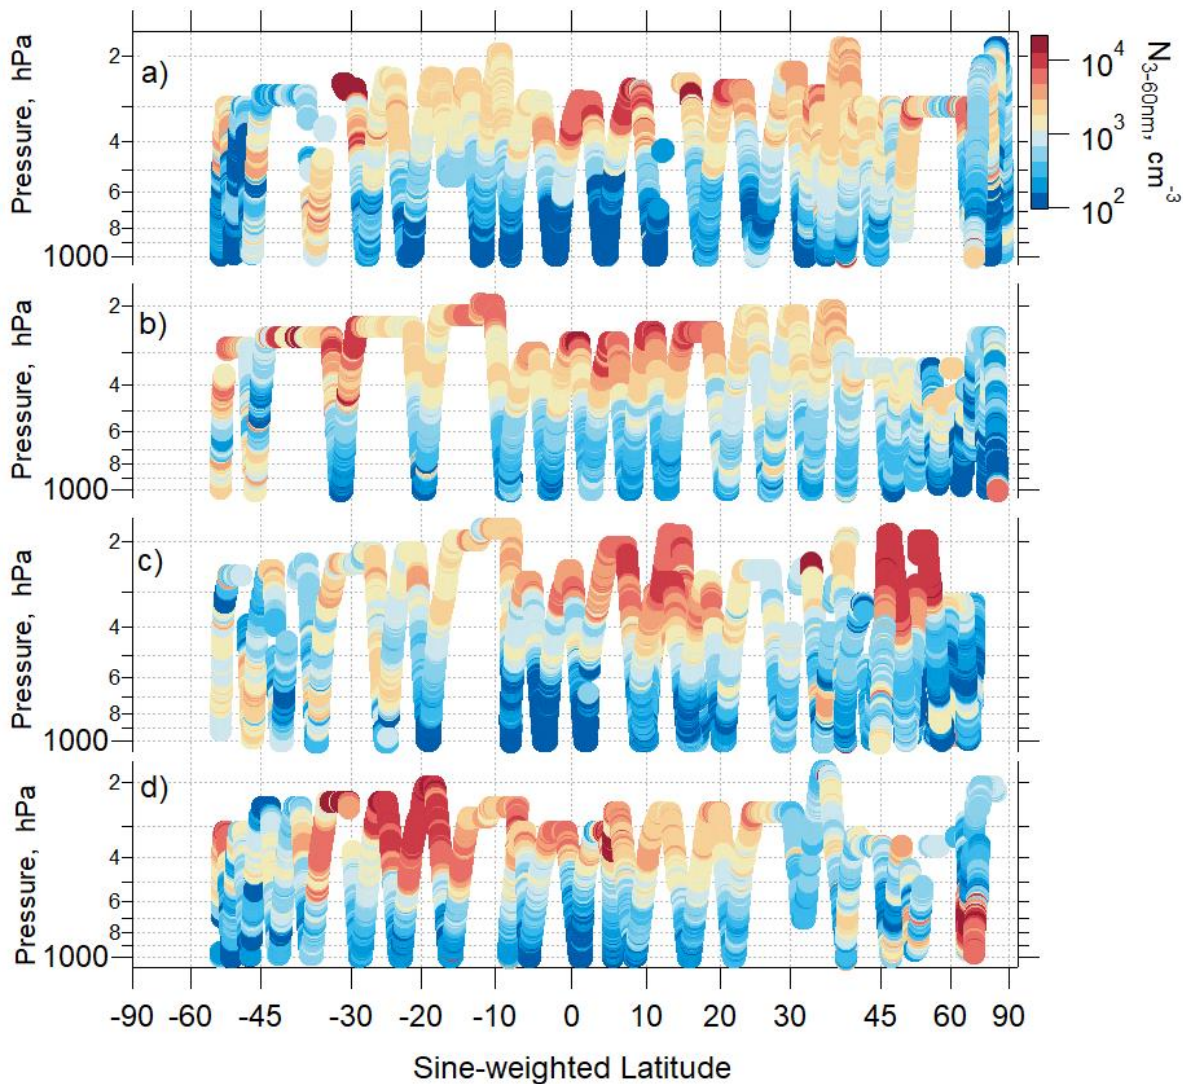

Figure S6: Ambient pressure as a function of sine-weighted latitude colored by the measured number concentration of nucleation and Aitken mode particles ( $D_p$  from 3 - 60 nm) over the Atlantic Ocean for a) ATom 1, July-August 2016; b) ATom 2, January-February 2017; c) ATom 3, September-October 2017; and d) ATom 4, April-May 2018). Periods of flight in clouds, over continents and near airports have been removed.



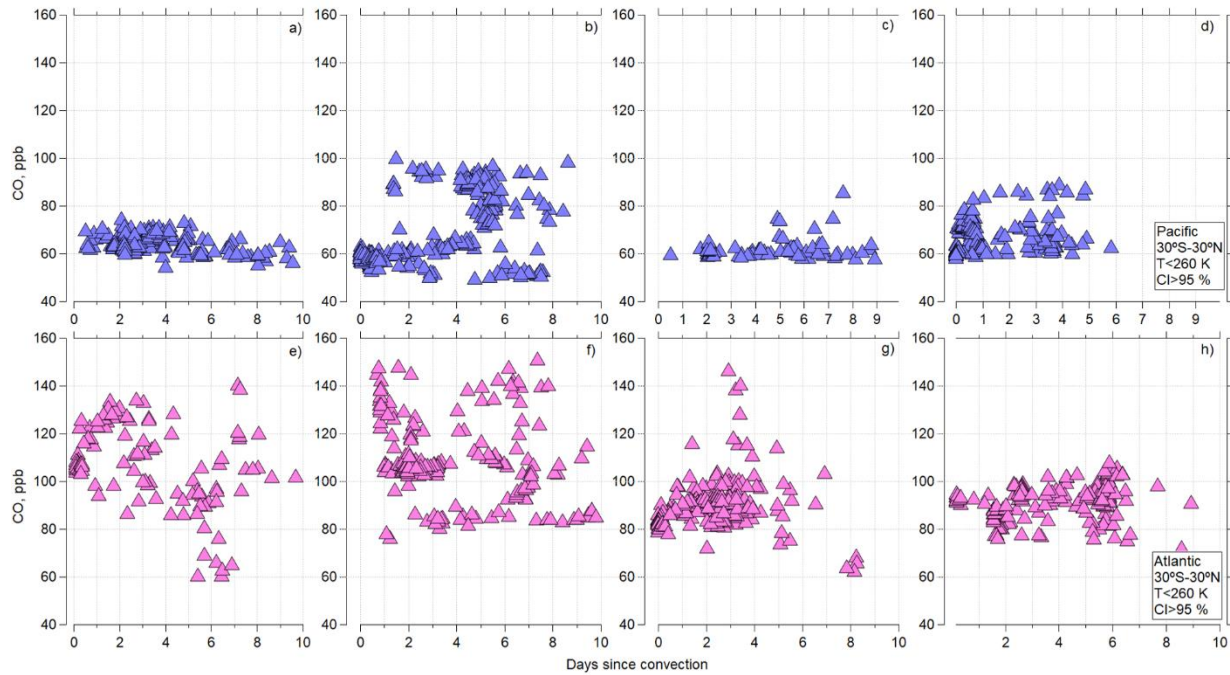

**Figure S7: Carbon monoxide (CO) mixing ratio as a function of time since convective influence for ATom 1-4 over the Pacific (a-d) and Atlantic Oceans (e-h) (30° S - 30° N), where temperature <260 K and probability of CI is >95 %. If these conditions are met, and an aerosol number mode with a modal peak diameter <12 nm is present within one day since CI, we consider the case for analysis by box modelling.**

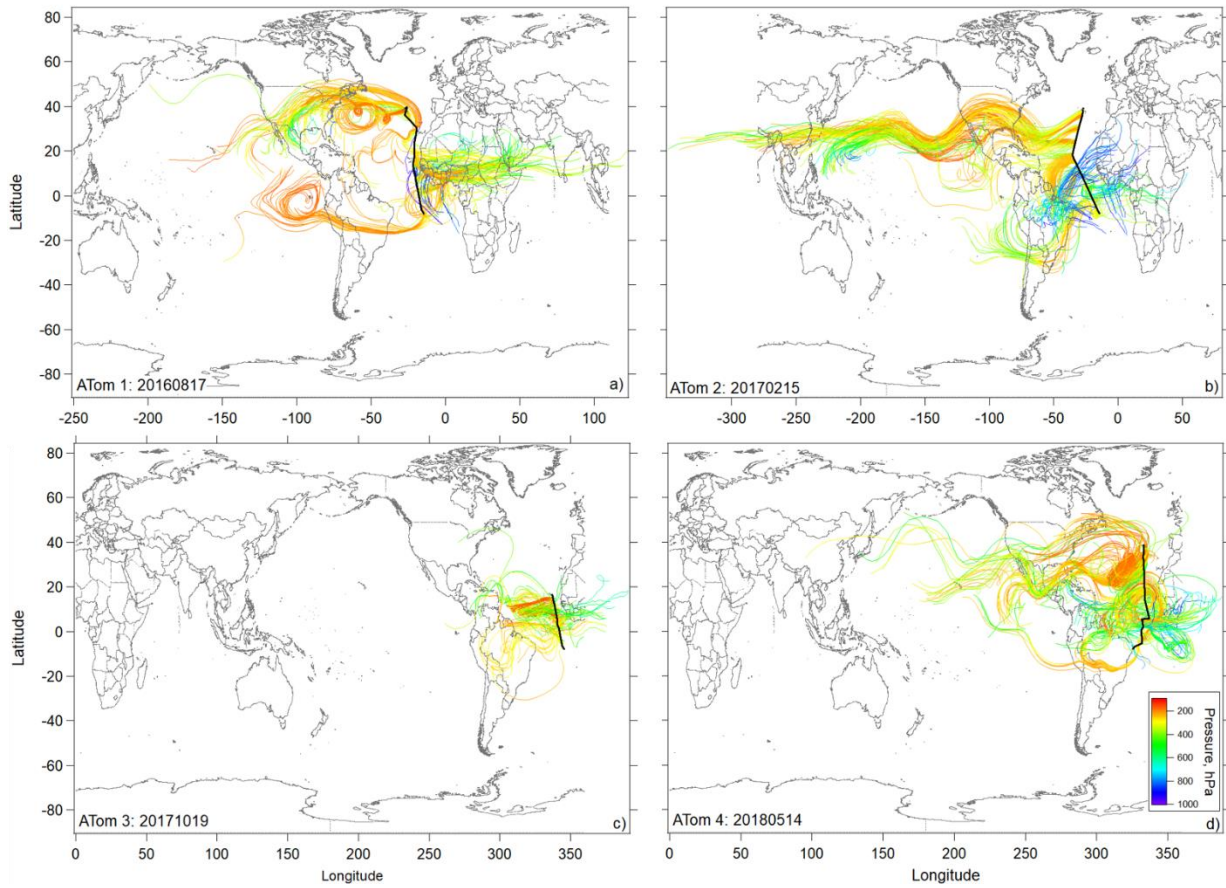

**Figure S8: Flight track and selected 10-day back trajectories initiated for times in flight at pressures <400 hPa (<~260 K) sampled along the DC-8 flight track during ATom 1, 2 (a,b), 3 and 4 (c, d) during the most tropical flight in each deployment (Ascension Island-Terceira on ATom 1-2, Ascension Island-Cape Verde on Atom 3, and Recife-Terceira on ATom 4). Trajectories are colored according to the pressure along their pathway.**

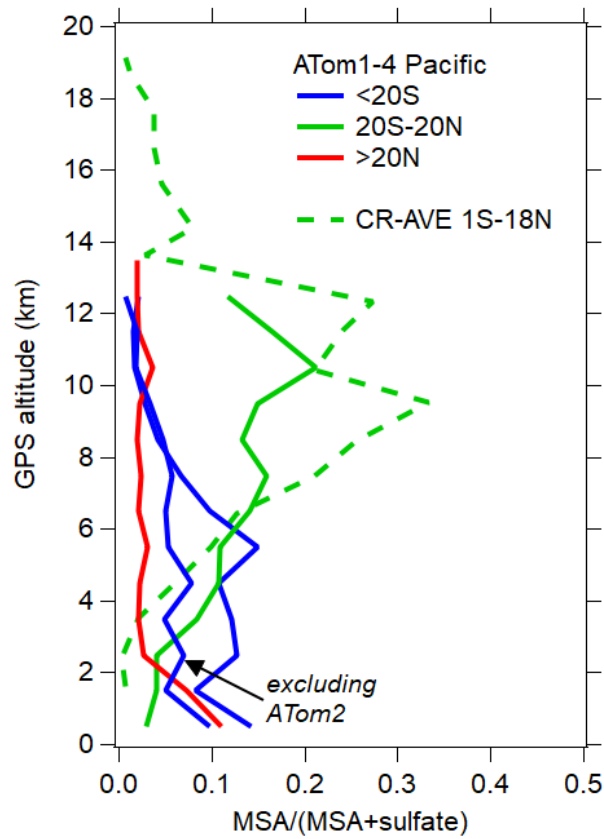

**Figure S9:** Vertical profiles of the PALMS methanesulfonic acid (MSA) signal fraction for ATom1-4. The raw MSA signal (positive  $m/z$  97) is plotted relative to the sum of MSA and sulfate (positive  $m/z$  99) signals. During ATom the MSA maximum occurred in the tropical upper troposphere, indicating a relatively high influence of marine boundary layer air and that DMS contributed directly to sulfuric acid production. One anomalously high MSA period also occurred in southern latitudes during ATom2, where the signal fraction averaged  $\sim 0.3$  for altitudes  $< 6$  km. High concentrations of 3-60 nm particles were observed during this anomalously high MSA period (Fig 2). The southern MSA signal fraction was  $< 0.1$  for all other ATom campaigns. A similar enhancement of MSA in the Pacific tropical upper troposphere was also observed during the NASA Costa Rica Aura Validation Experiment (CR-AVE) campaign (Froyd et al., 2009). For this study the PALMS size range is restricted to 0.125-1.5  $\mu\text{m}$ .

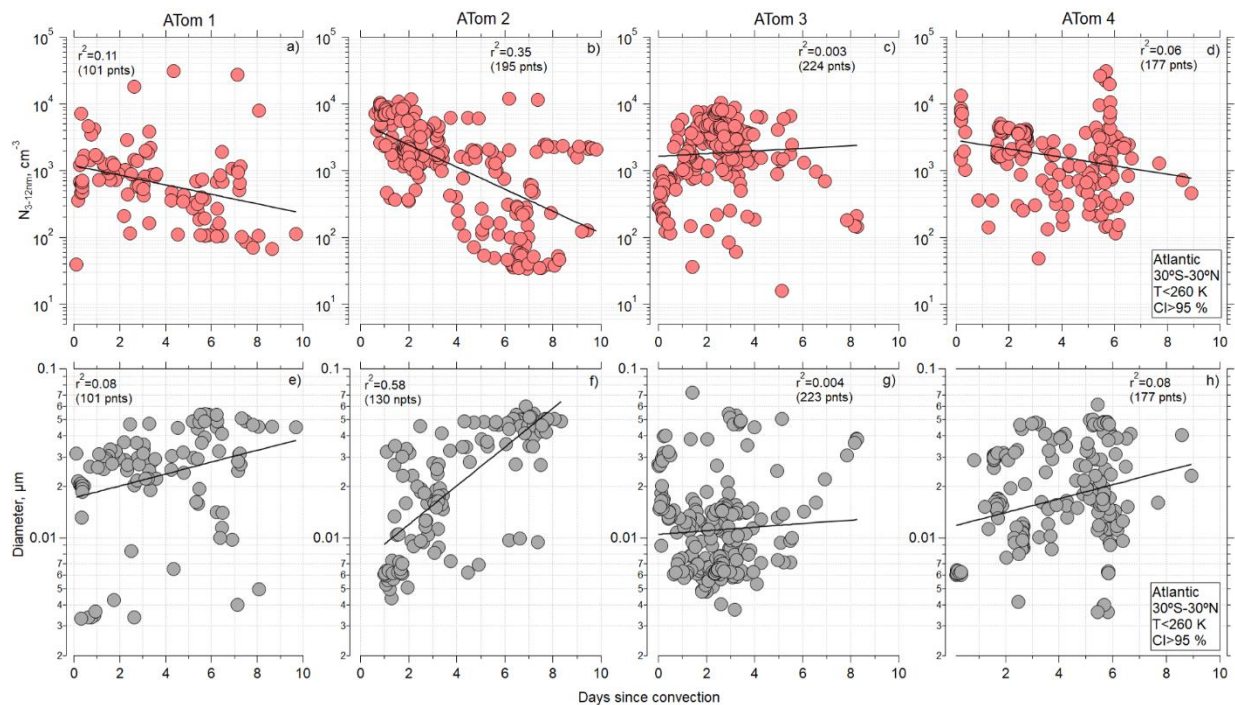

**Figure S10: (a-d) Concentration of nucleation mode particles as a function of time since convective influence for ATom 1-4, over the Atlantic Ocean (30° S - 30° N) and temperature <260 K and probability of convective influence >95 %, respectively. (e-h) Modal diameter of particles with  $D_p < 60$  nm as a function of time since convective influence (30° S - 30° N) for ATom 1-4, respectively. Black line, used to guide the eye, represents the linear regression fitted to log-y values. A corresponding Pearson correlation coefficient  $r^2$  is indicated.**

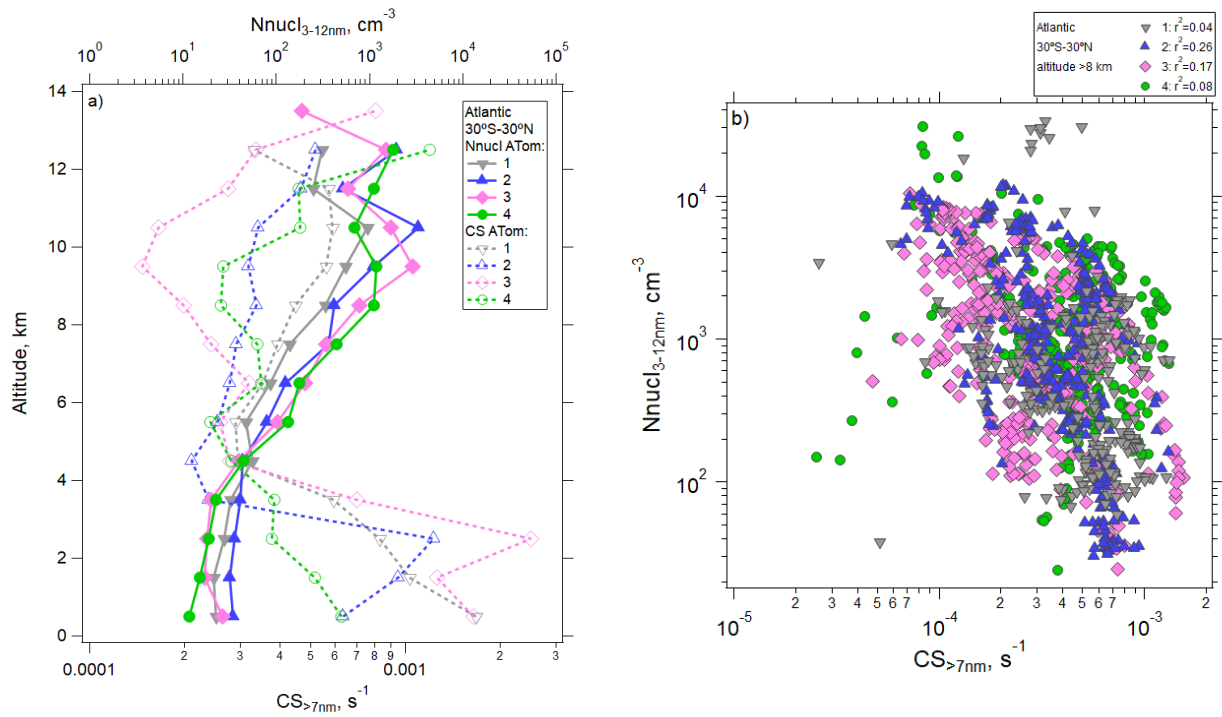

**Figure S11: a) Vertical profile of the median number concentration of nucleation mode particles (3-12 nm) and condensation sink (CS) averaged between 30° S - 30° N as a function of altitude for the four ATom deployments over the Atlantic Ocean. b) One-minute average nucleation mode particle concentrations at >8 km in altitude as a function of CS between 30° S - 30° N. Pearson correlation coefficient values ( $r^2$ ) are indicated in the legend.**

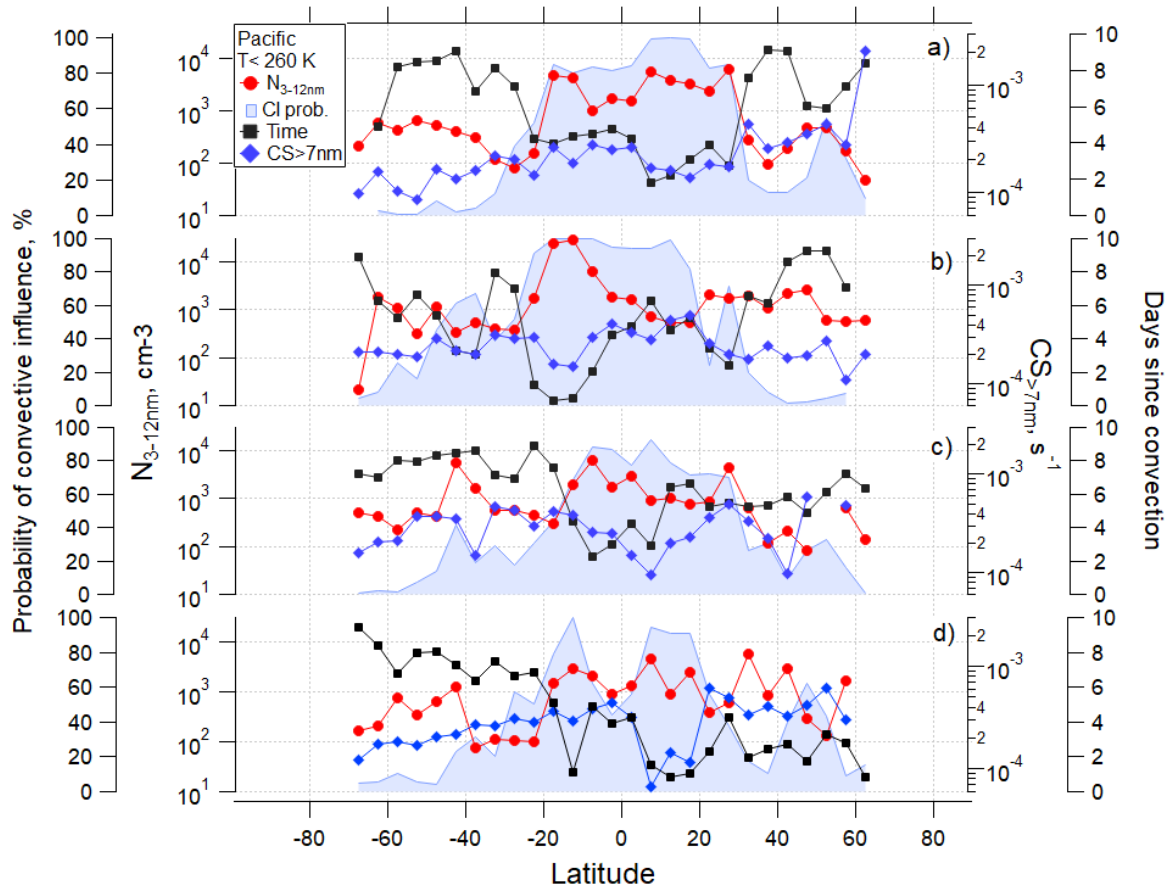

**Figure S12:** The number of nucleation mode particles ( $N_{3-12}$ ), probability of convective influence (CI), time since most recent CI, and condensation sink (CS)  $>7$  nm, as a function of latitude binned in  $5^\circ$  increments for temperature  $<260$  K for ATom 1-4 over the Pacific Ocean (a-d). The largest number concentration of nucleation mode ( $D_p$  from 3-12 nm) particles was found to spatially coexist with the lowest CS, the shortest time since recent convective activity, and the highest probability of convection. Tropical convection does not produce uniquely low condensation sinks at high altitudes where the most NPF is observed; for example, very low CS was also found in the middle troposphere over the Southern Ocean at  $T < 260$  K. Therefore, it is likely that a stronger source of condensable material must be available in the tropical regions than in other cold areas with low CS where NPF was not encountered as frequently (Williamson et al., 2019). This means that the significant occurrence of NPF in this region is likely due to a combination of convective activity bringing precursor gases from lower altitudes and removing pre-existing particles, cold temperatures, and high solar zenith angles in the tropics photo-oxidizing these precursors to produce condensable species (Gao et al., 2014).



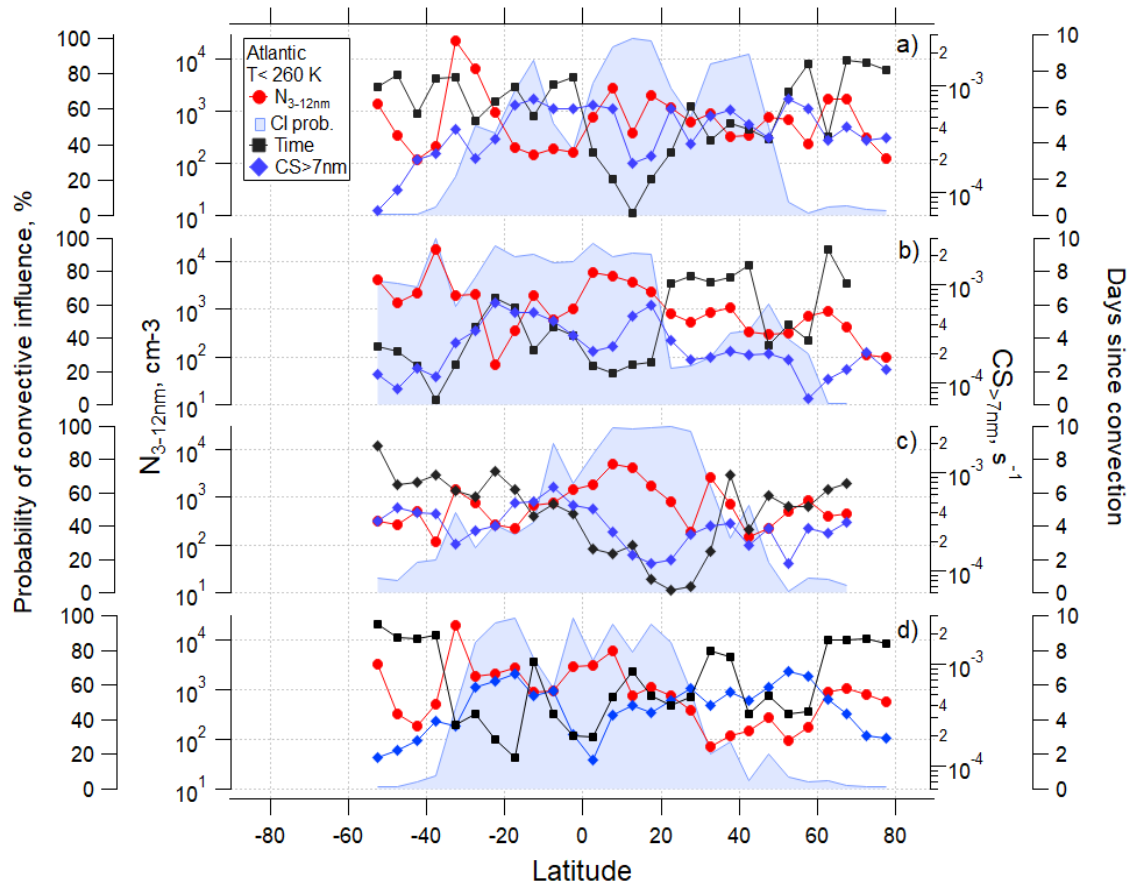

Figure S13: As in Fig. S12, but for flights over the Atlantic Ocean.

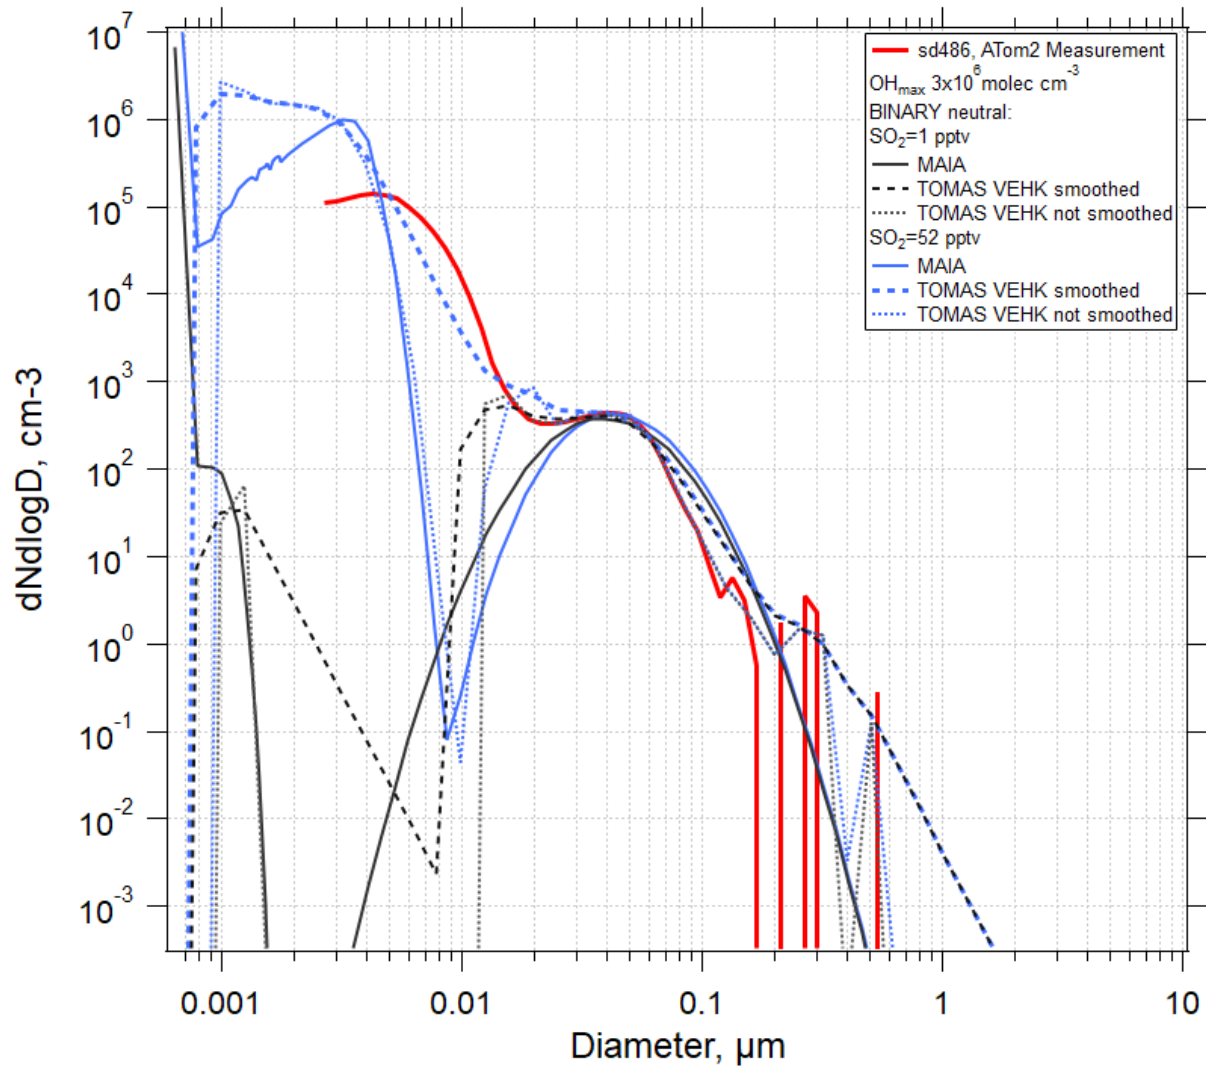

| SO2<br>pptv | NME      |              |              |
|-------------|----------|--------------|--------------|
|             | TOMAS    |              | MAIA         |
|             | Smoothed | Not smoothed | Not smoothed |
| 1           | 0.980    | 0.979        | 0.999        |
| 51.8        | 0.991    | 0.870        | 0.973        |

Figure S14: An example of the smoothed and not-smoothed TOMAS size distribution for VEHK scheme and comparison to non-smoothed MAIA neutral binary output. Table presents NME values for the corresponding curves presented in the figure.



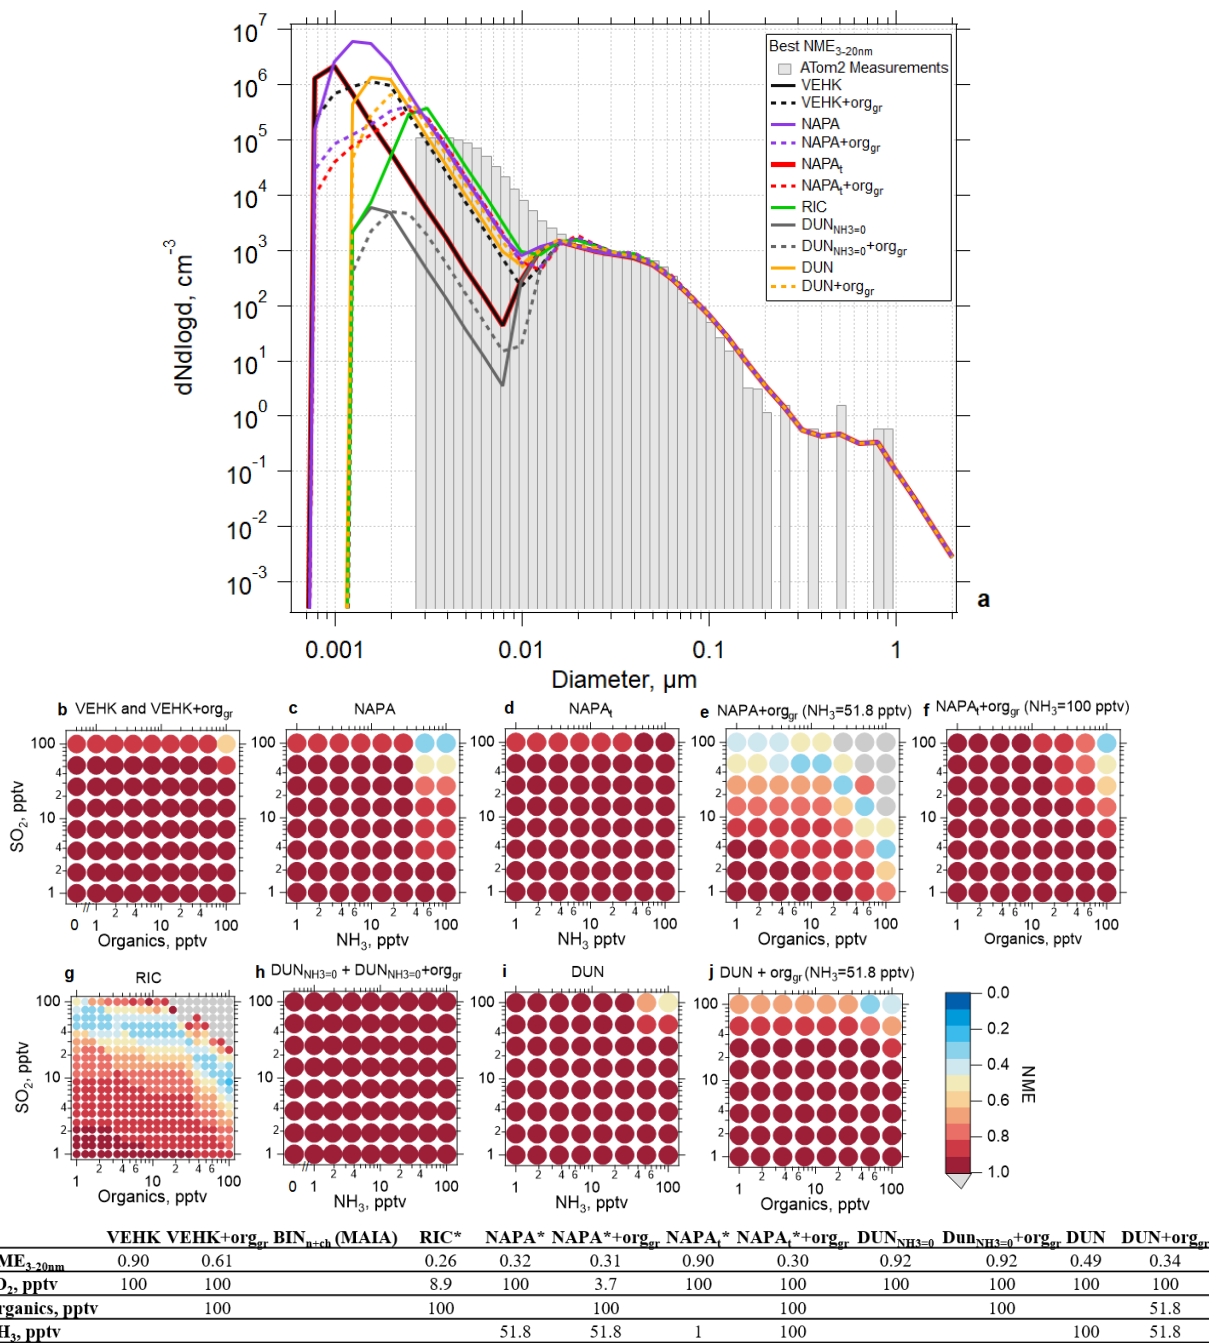

**Figure S15: Results of simulations using the TOMAS box model for case sd390 (ATom 2, 2017-02-04, 01:29:31-01:30:30 UTC) where measurements were made 1 hour following convective influence, and temperature along the trajectory varied between 230 and 231 K. (a) Observed (shaded bars) and simulated (lines) aerosol size distributions with best normalized mean error (*NME*) for each of the NPF and growth schemes investigated. (b) *NME* between the modeled and measured size distribution for the VEHK scheme with varying organics mixing ratios for condensational growth. The color of the circle indicates the value of *NME* corresponding to a particular initial mixing ratio of SO<sub>2</sub>, NH<sub>3</sub>, or organics that varied between 0 and 100 pptv. Blue represents the best agreement, red poorer agreement, and grey the worst (*NME* > 1). There were 64 sensitivity tests. (c) As in (b), but for the NAPA scheme. (d) As in (c), but for the NAPAt scheme. (e) and (f) as in (c) and (d) respectively, but with NH<sub>3</sub> fixed and varying organics for condensation growth. (g) as in (b) but for the RIC scheme, which provides the lowest *NME*. There were 400 sensitivity tests for this scheme. (h) as in (b) but for the DUN scheme with NH<sub>3</sub> set to 0 (DUN<sub>NH3=0</sub>). (i) as in (c) but for the DUN scheme. (j) as in (i) but with varying organics for condensation growth. The table presents the *NME* results for the corresponding size distributions in panel (a) and associated initial mixing ratios of gas-phase precursors.**

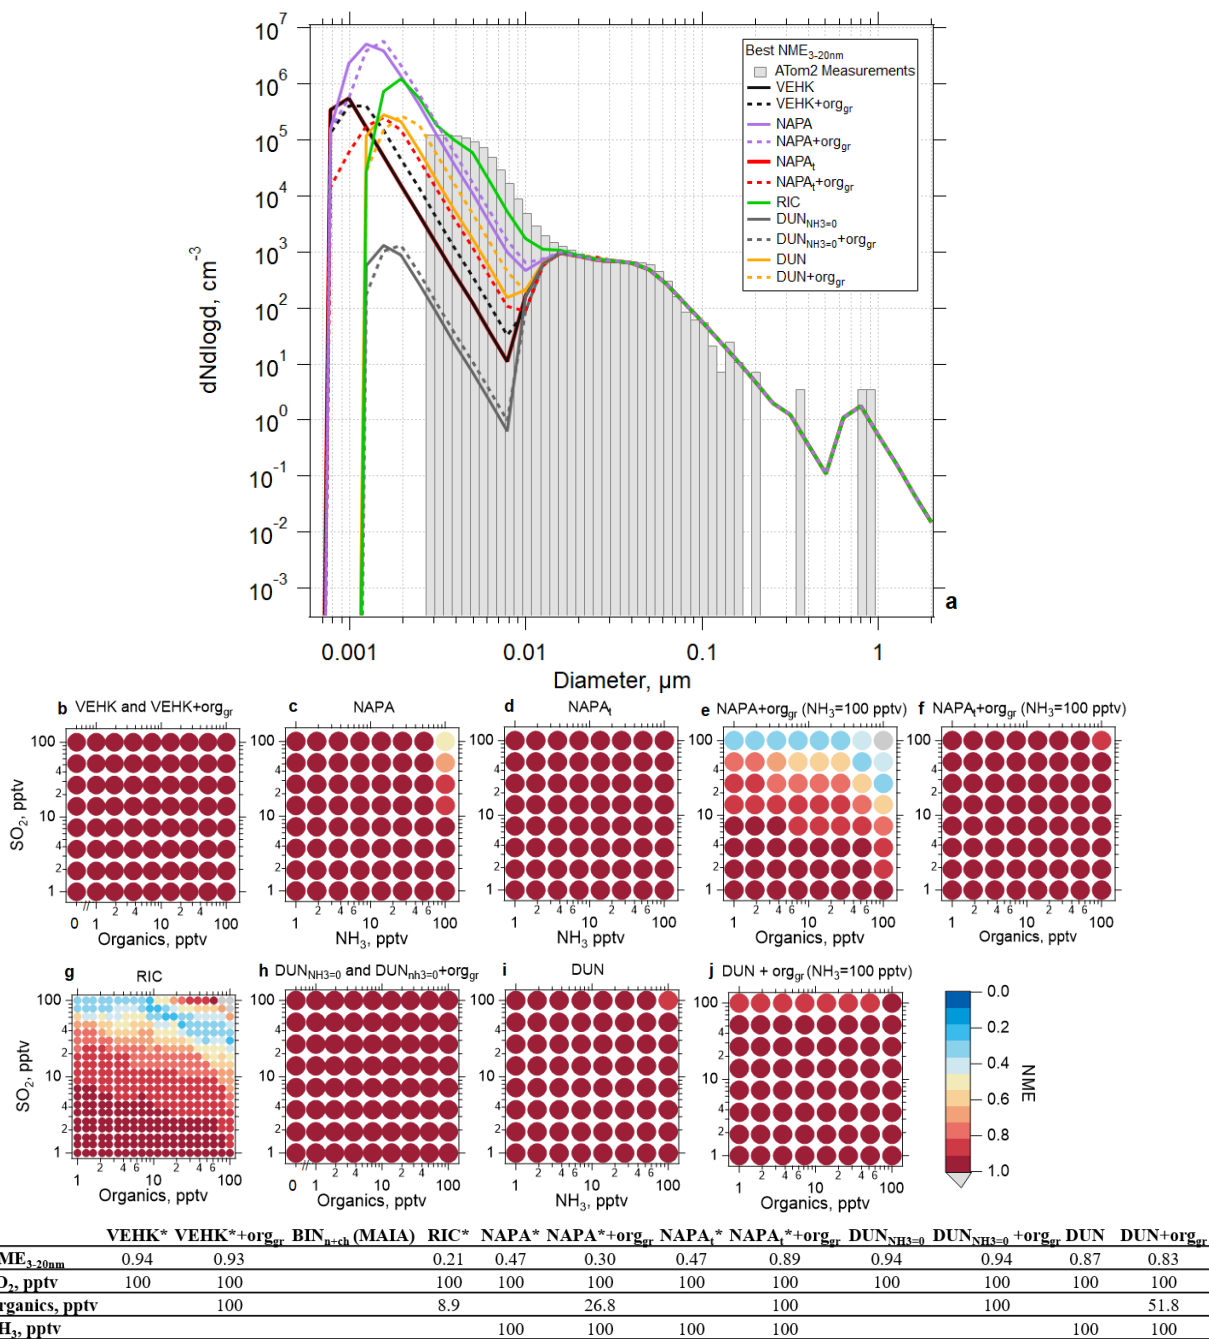

**Figure S16: Results of simulations using the TOMAS box model for case sd391 (ATom 2, 2017-02-04, 01:20:31-01:31:30 UTC) where measurements were made 0.66 hours following convective influence, and temperature along the trajectory varied around 228 K. (a) Observed (shaded bars) and simulated (lines) aerosol size distributions with best normalized mean error (*NME*) for each of the NPF and growth schemes investigated. (b) *NME* between the modeled and measured size distribution for the VEHK scheme with varying organics mixing ratios for condensational growth. The color of the circle indicates the value of *NME* corresponding to a particular initial mixing ratio of SO<sub>2</sub>, NH<sub>3</sub>, or organics that varied between 0 and 100 pptv. Blue represents the best agreement, red poorer agreement, and grey the worst (*NME* > 1). There were 64 sensitivity tests. (c) As in (b), but for the NAPA scheme. (d) As in (c), but for the NAPAt scheme. (e) and (f) as in (c) and (d) respectively, but with NH<sub>3</sub> fixed and varying organics for condensational growth. (g) as in (b) but for the RIC scheme, which provides the lowest *NME*. There were 400 sensitivity tests for this scheme. (h) as in (b) but for the DUN scheme with NH<sub>3</sub> set to 0 (DUN<sub>NH3=0</sub>). (i) as in (c) but for the DUN scheme. (j) as in (i) but with varying organics for condensational growth. The table presents the *NME* results for the corresponding size distributions in panel (a) and associated initial mixing ratios of gas-phase precursors.**

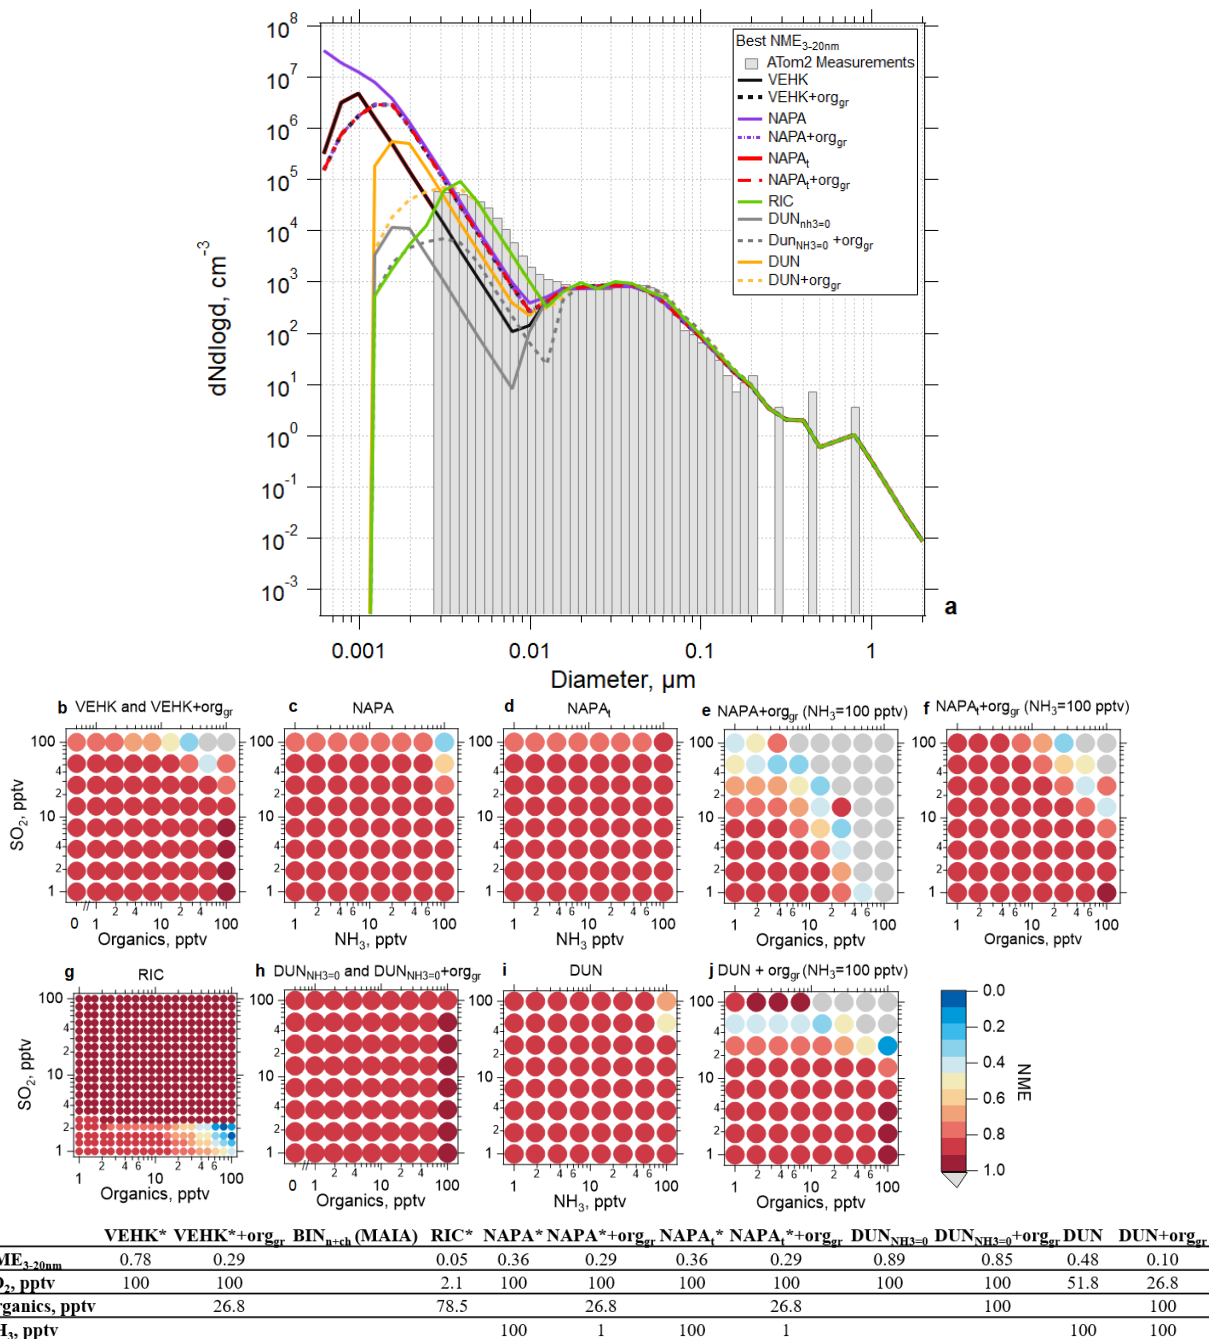

**Figure S17: Results of simulations using the TOMAS box model for case sd400 (ATom 2, 2017-02-04, 01:39:31-01:40:30 UTC) where measurements were made 1.17 hours following convective influence, and temperature along the trajectory varied between 224 and 226 K. (a) Observed (shaded bars) and simulated (lines) aerosol size distributions with best normalized mean error (NME) for each of the NPF and growth schemes investigated. (b) NME between the modeled and measured size distribution for the VEHK scheme with varying organics mixing ratios for condensational growth. The color of the circle indicates the value of NME corresponding to a particular initial mixing ratio of SO<sub>2</sub>, NH<sub>3</sub>, or organics that varied between 0 and 100 pptv. Blue represents the best agreement, red poorer agreement, and grey the worst (NME >1). There were 64 sensitivity tests. (c) As in (b), but for the NAPA scheme. (d) As in (c), but for the NAPAt scheme. (e) and (f) as in (c) and (d) respectively, but with NH<sub>3</sub> fixed and varying organics for condensation growth. (g) as in (b) but for the RIC scheme, which provides the lowest NME. There were 400 sensitivity tests for this scheme. (h) as in (b) but for the DUN scheme with NH<sub>3</sub> set to 0 (DUN<sub>NH3=0</sub>). (i) as in (c) but for the DUN scheme. (j) as in (i) but with varying organics for condensation growth. The table presents the NME results for the corresponding size distributions in panel (a) and associated initial mixing ratios of gas-phase precursors.**

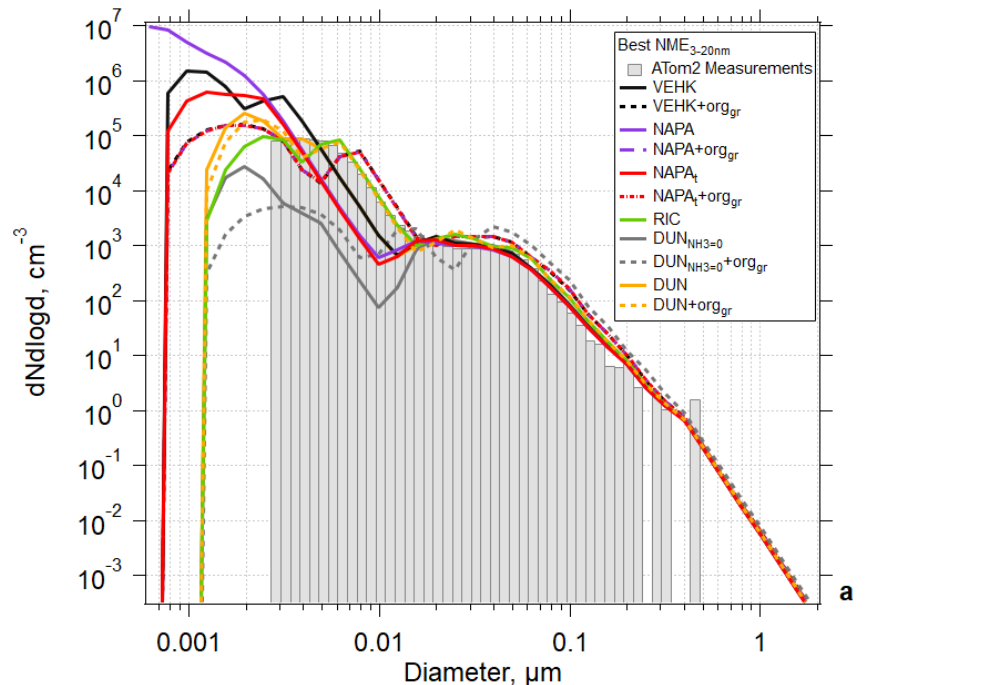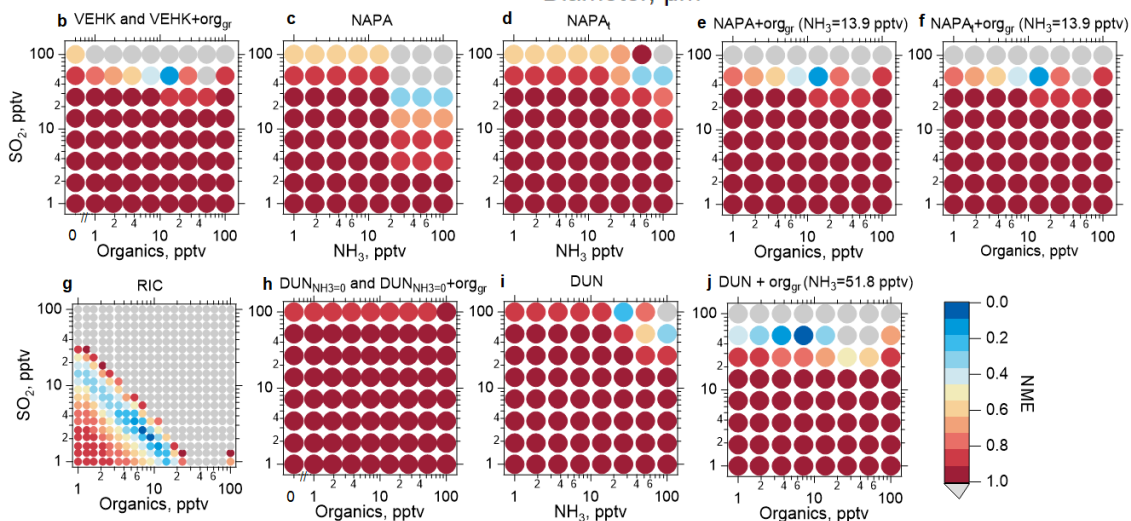

|                        | VEHK | VEHK+org <sub>gr</sub> | BIN <sub>NH3</sub> (MAIA) | RIC* | NAPA* | NAPA*+org <sub>gr</sub> | NAPA <sub>t</sub> * | NAPA <sub>t</sub> *+org <sub>gr</sub> | DUN <sub>NH3=0</sub> | DUN <sub>NH3=0</sub> +org <sub>gr</sub> | DUN  | DUN+org <sub>gr</sub> |
|------------------------|------|------------------------|---------------------------|------|-------|-------------------------|---------------------|---------------------------------------|----------------------|-----------------------------------------|------|-----------------------|
| NME <sub>3-20nm</sub>  | 0.63 | 0.15                   |                           | 0.06 | 0.33  | 0.15                    | 0.34                | 0.15                                  | 0.90                 | 0.86                                    | 0.27 | 0.07                  |
| SO <sub>2</sub> , pptv | 100  | 51.8                   |                           | 2.1  | 26.8  | 51.8                    | 51.8                | 51.8                                  | 100                  | 100                                     | 100  | 51.8                  |
| Organics, pptv         |      | 13.9                   |                           | 8.9  |       | 13.9                    |                     | 13.9                                  |                      | 26.8                                    |      | 7                     |
| NH <sub>3</sub> , pptv |      |                        |                           |      | 26.8  | 13.9                    | 100                 | 13.9                                  |                      |                                         | 26.8 | 51.8                  |

\*Temperature along the trajectory does not lie within the temperature range of the scheme

**Figure S18: Results of simulations using the TOMAS box model for case sd404 (ATom 2, 2017-02-04, 01:43:31-01:44:30 UTC) where measurements were made 3.5 hours following convective influence, and temperature along the trajectory varied between 234 and 236 K. (a) Observed (shaded bars) and simulated (lines) aerosol size distributions with best normalized mean error (NME) for each of the NPF and growth schemes investigated. (b) NME between the modeled and measured size distribution for the VEHK scheme with varying organics mixing ratios for condensational growth. The color of the circle indicates the value of NME corresponding to a particular initial mixing ratio of SO<sub>2</sub>, NH<sub>3</sub>, or organics that varied between 0 and 100 pptv. Blue represents the best agreement, red poorer agreement, and grey the worst (NME >1). There were 64 sensitivity tests. (c) As in (b), but for the NAPA scheme. (d) As in (c), but for the NAPAt scheme. (e) and (f) as in (c) and (d) respectively, but with NH<sub>3</sub> fixed and varying organics for condensation growth. (g) as in (b) but for the RIC scheme, which provides the lowest NME. There were 400 sensitivity tests for this scheme. (h) as in (b) but for the DUN scheme with NH<sub>3</sub> set to 0 (DUN<sub>NH3=0</sub>). (i) as in (c) but for the DUN scheme. (j) as in (i) but with varying organics for condensation growth. The table presents the NME results for the corresponding size distributions in panel (a) and associated initial mixing ratios of gas-phase precursors.**



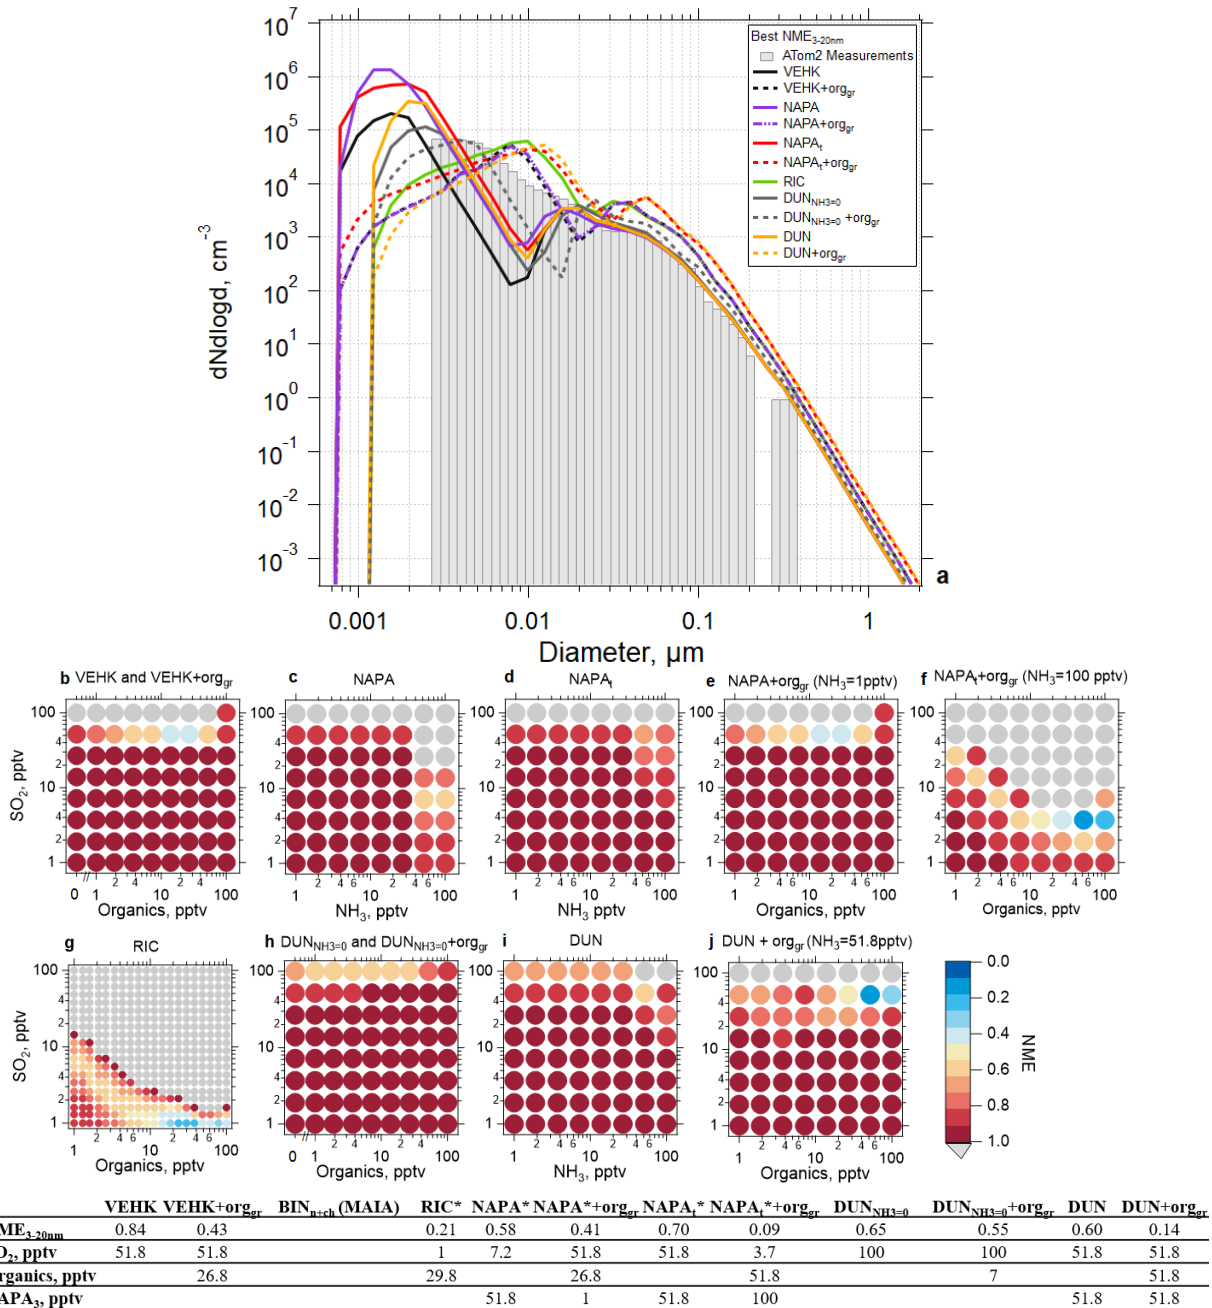

**Figure S19: Results of simulations using the TOMAS box model for case sd446 (ATom 2, 2017-02-04, 02:25:31-02:26:30 UTC) where measurements were made 7.85 hours following convective influence, and temperature along the trajectory varied between 238 and 242 K. (a) Observed (shaded bars) and simulated (lines) aerosol size distributions with best normalized mean error (NME) for each of the NPF and growth schemes investigated. (b) NME between the modeled and measured size distribution for the VEHK scheme with varying organics mixing ratios for condensational growth. The color of the circle indicates the value of NME corresponding to a particular initial mixing ratio of SO<sub>2</sub>, NH<sub>3</sub>, or organics that varied between 0 and 100 pptv. Blue represents the best agreement, red poorer agreement, and grey the worst (NME >1). There were 64 sensitivity tests. (c) As in (b), but for the NAPA scheme. (d) As in (c), but for the NAPAT scheme. (e) and (f) as in (c) and (d) respectively, but with NH<sub>3</sub> fixed and varying organics for condensational growth. (g) as in (b) but for the RIC scheme, which provides the lowest NME. There were 400 sensitivity tests for this scheme. (h) as in (b) but for the DUN scheme with NH<sub>3</sub> set to 0 (DUN<sub>NH3=0</sub>). (i) as in (c) but for the DUN scheme. (j) as in (i) but with varying organics for condensational growth. The table presents the NME results for the corresponding size distributions in panel (a) and associated initial mixing ratios of gas-phase precursors.**

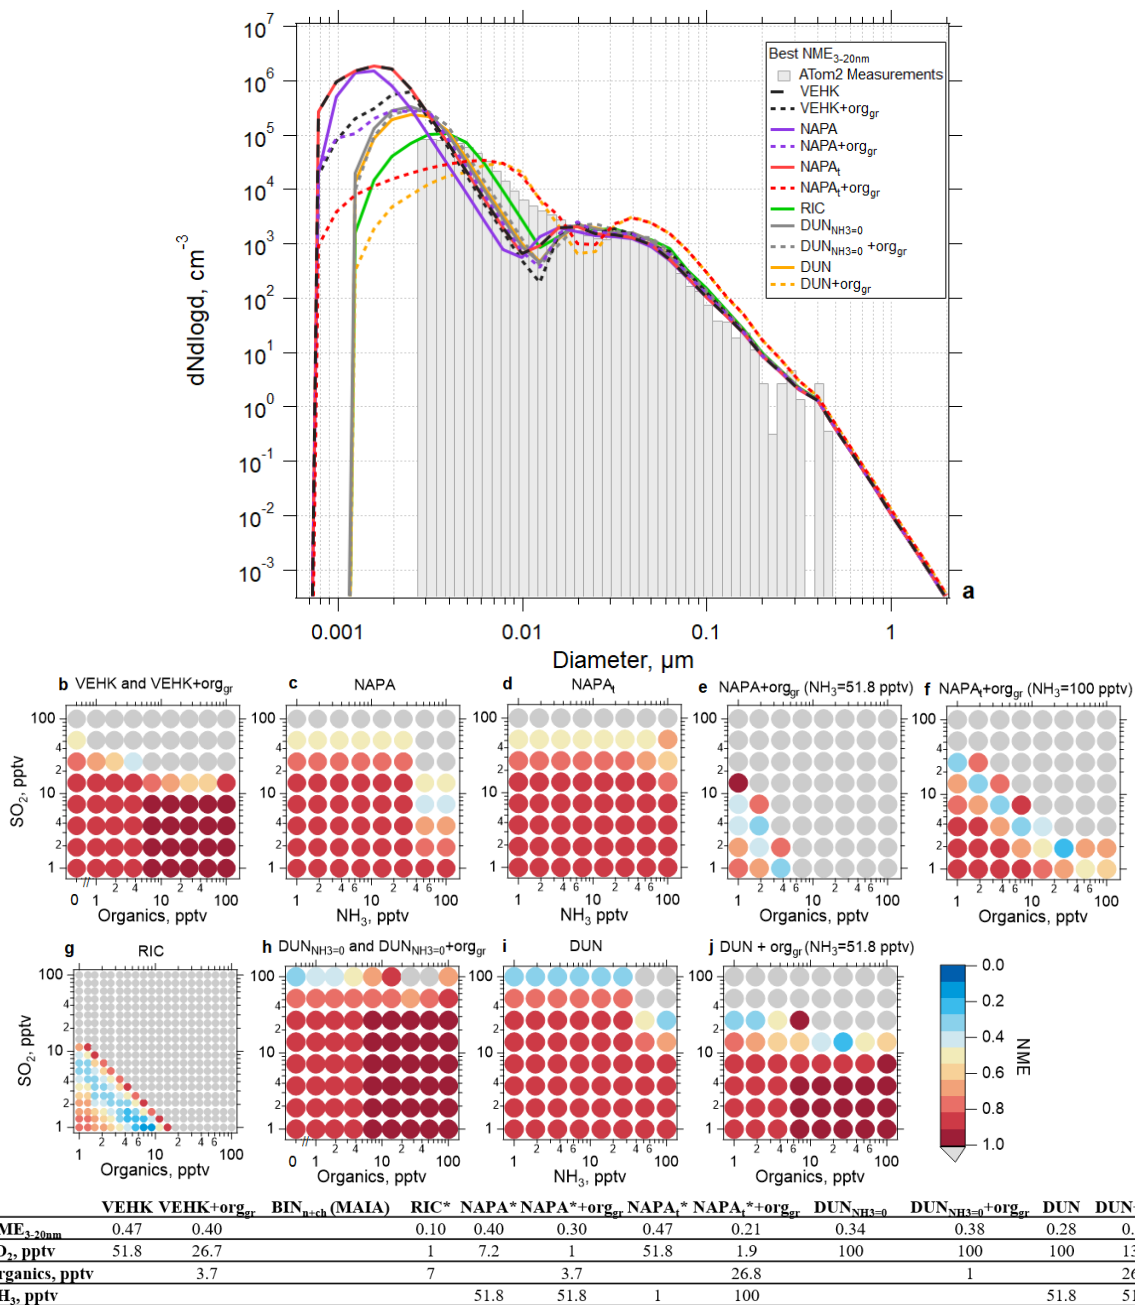

Figure S20: Results of simulations using the TOMAS box model for case sd448 (ATom 2, 2017-02-04, 02:27:31-02:28:30 UTC) where measurements were made 9.08 hours following convective influence, and temperature along the trajectory varied between 230 and 235 K. (a) Observed (shaded bars) and simulated (lines) aerosol size distributions with best normalized mean error (*NME*) for each of the NPF and growth schemes investigated. (b) *NME* between the modeled and measured size distribution for the VEHK scheme with varying organics mixing ratios for condensational growth. The color of the circle indicates the value of *NME* corresponding to a particular initial mixing ratio of SO<sub>2</sub>, NH<sub>3</sub>, or organics that varied between 0 and 100 pptv. Blue represents the best agreement, red poorer agreement, and grey the worst (*NME* > 1). There were 64 sensitivity tests. (c) As in (b), but for the NAPA scheme. (d) As in (c), but for the NAPAt scheme. (e) and (f) as in (c) and (d) respectively, but with NH<sub>3</sub> fixed and varying organics for condensation growth. (g) as in (b) but for the RIC scheme, which provides the lowest *NME*. There were 400 sensitivity tests for this scheme. (h) as in (b) but for the DUN scheme with NH<sub>3</sub> set to 0 (DUN<sub>NH3=0</sub>). (i) as in (c) but for the DUN scheme. (j) as in (i) but with varying organics for condensation growth. The table presents the *NME* results for the corresponding size distributions in panel (a) and associated initial mixing ratios of gas-phase precursors.

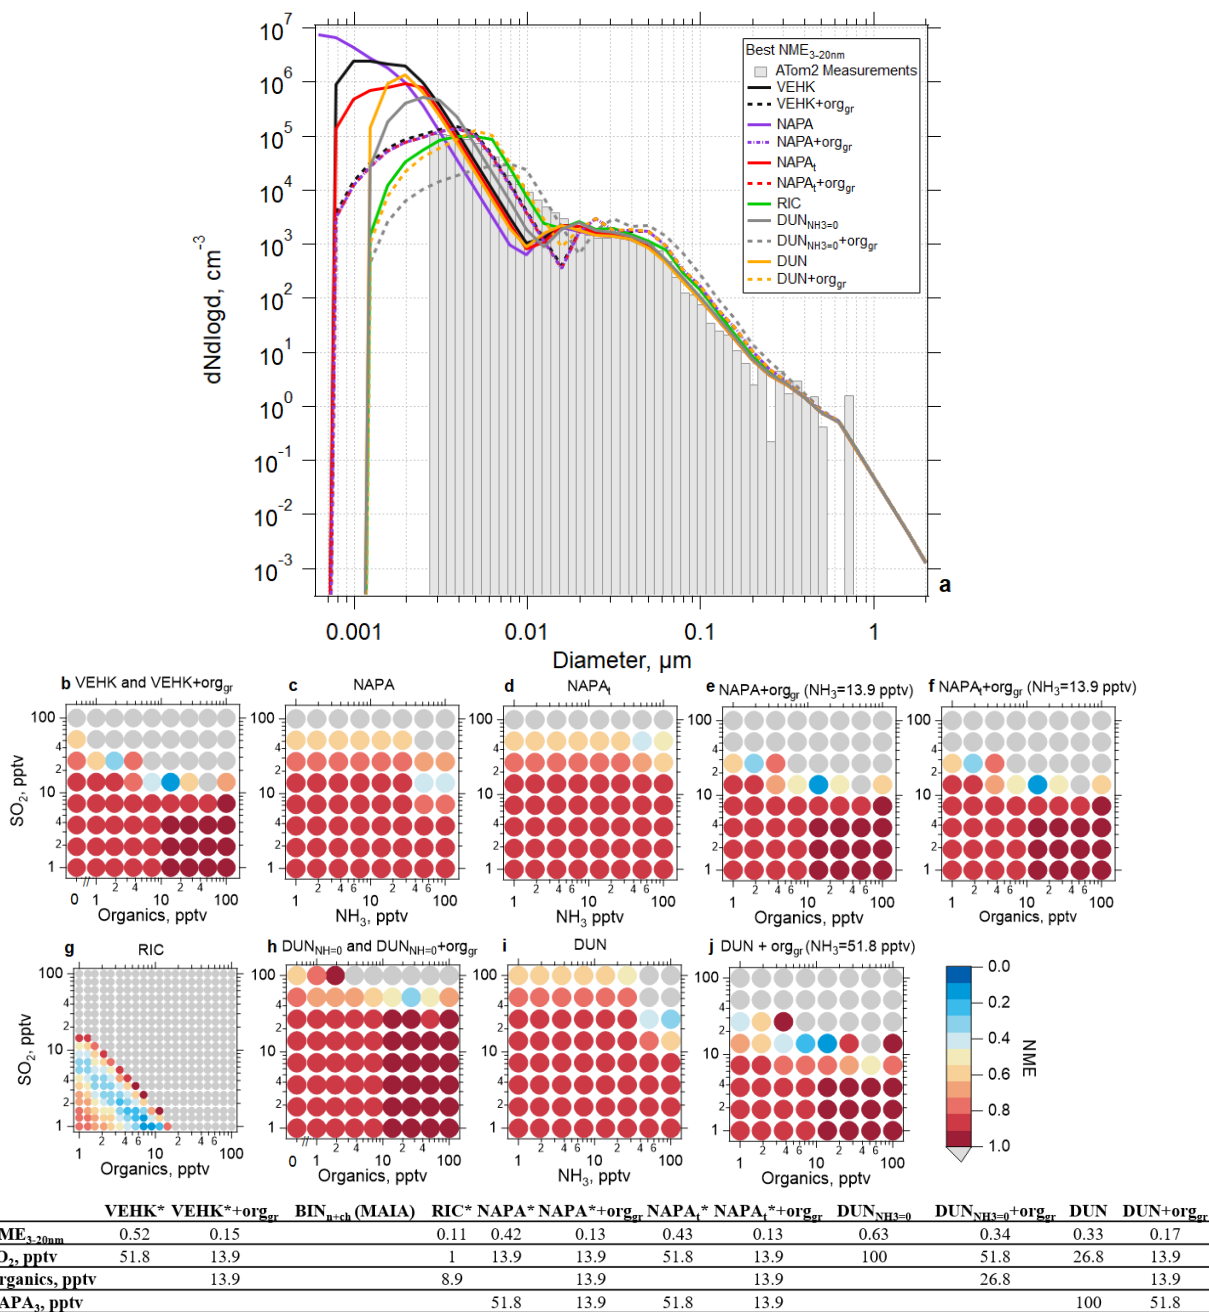

**Figure S21: Results of simulations using the TOMAS box model for case sd452 (ATom 2, 2017-02-43, 02:31:31-02:32:30 UTC) where measurements were made 6.5 hours following convective influence, and temperature along the trajectory varied between 224 and 230 K. (a) Observed (shaded bars) and simulated (lines) aerosol size distributions with best normalized mean error (NME) for each of the NPF and growth schemes investigated. (b) NME between the modeled and measured size distribution for the VEHK scheme with varying organics mixing ratios for condensational growth. The color of the circle indicates the value of NME corresponding to a particular initial mixing ratio of SO<sub>2</sub>, NH<sub>3</sub>, or organics that varied between 0 and 100 pptv. Blue represents the best agreement, red poorer agreement, and grey the worst (NME >1). There were 64 sensitivity tests. (c) As in (b), but for the NAPA scheme. (d) As in (c), but for the NAPAt scheme. (e) and (f) as in (c) and (d) respectively, but with NH<sub>3</sub> fixed and varying organics for condensation growth. (g) as in (b) but for the RIC scheme, which provides the lowest NME. There were 400 sensitivity tests for this scheme. (h) as in (b) but for the DUN scheme with NH<sub>3</sub> set to 0 (DUN<sub>NH3=0</sub>). (i) as in (c) but for the DUN scheme. (j) as in (i) but with varying organics for condensation growth. The table presents the NME results for the corresponding size distributions in panel (a) and associated initial mixing ratios of gas-phase precursors.**

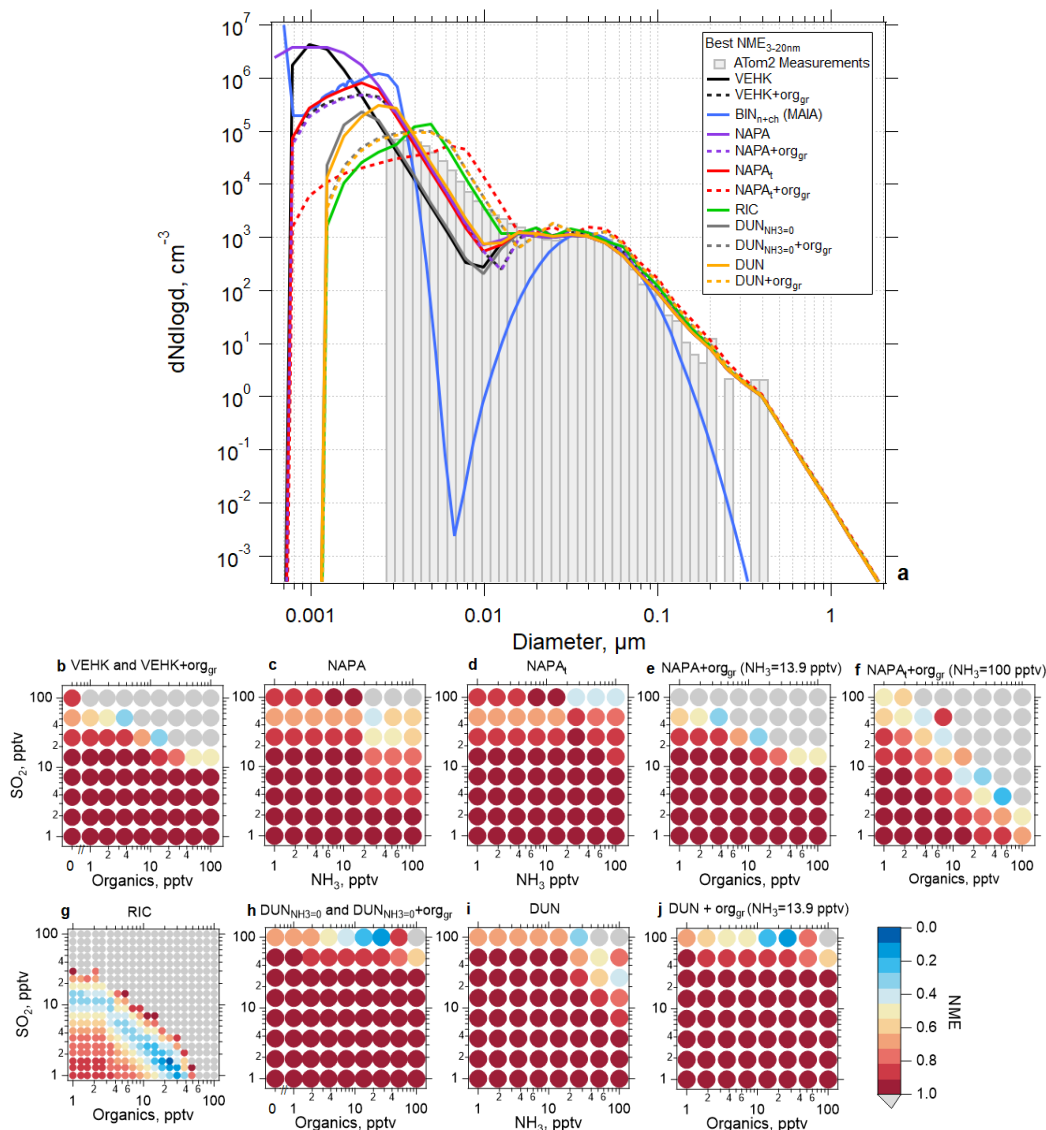

|                             | VEHK* | VEHK*+org <sub>gr</sub> | BIN <sub>n+ch</sub> (MAIA) | RIC* | NAPA* | NAPA*+org <sub>gr</sub> | NAPA <sub>t</sub> * | NAPA <sub>t</sub> *+org <sub>gr</sub> | DUN <sub>NH3=0</sub> | DUN <sub>NH3=0</sub> +org <sub>gr</sub> | DUN  | DUN+org <sub>gr</sub> |
|-----------------------------|-------|-------------------------|----------------------------|------|-------|-------------------------|---------------------|---------------------------------------|----------------------|-----------------------------------------|------|-----------------------|
| <b>NME<sub>3-20nm</sub></b> | 0.72  | 0.32                    | 0.85                       | 0.08 | 0.45  | 0.32                    | 0.36                | 0.19                                  | 0.69                 | 0.13                                    | 0.30 | 0.09                  |
| <b>SO<sub>2</sub>, pptv</b> | 51.8  | 26.8                    | 100                        | 1.6  | 51.8  | 26.8                    | 100                 | 3.7                                   | 100                  | 100                                     | 100  | 100                   |
| <b>Organics, pptv</b>       |       | 13.9                    |                            | 23.4 |       | 13.9                    |                     | 51.8                                  |                      | 26.8                                    |      | 26.8                  |
| <b>NH<sub>3</sub>, pptv</b> |       |                         |                            |      | 26.8  | 13.9                    | 51.8                | 100                                   |                      |                                         | 26.8 | 13.9                  |

\*Temperature along the trajectory does not lie within the temperature range of the scheme

**Figure S22: Results of simulations using the TOMAS box model for case sd461 (ATom 2, 2017-02-04, 02:40:31-02:41:30 UTC) where measurements were made 2.83 hours following convective influence, and temperature along the trajectory varied between 223 and 226 K. (a) Observed (shaded bars) and simulated (lines) aerosol size distributions with best normalized mean error (*NME*) for each of the NPF and growth schemes investigated. Best results from the MAIA box model ion-assisted + neutral binary nucleation scheme shown as a blue line. (b) *NME* between the modeled and measured size distribution for the VEHK scheme with varying organics mixing ratios for condensational growth. The color of the circle indicates the value of *NME* corresponding to a particular initial mixing ratio of SO<sub>2</sub>, NH<sub>3</sub>, or organics that varied between 0 and 100 pptv. Blue represents the best agreement, red poorer agreement, and grey the worst (*NME* >1). There were 64 sensitivity tests for this scheme. (c) As in (b), but for the NAPA scheme. (d) As in (c), but for the NAPAt scheme. (e) and (f) as in (c) and (d) respectively, but with NH<sub>3</sub> fixed and varying organics for condensation growth. (g) as in (b) but for the RIC scheme, which provides the lowest *NME*. There were 400 sensitivity tests for this scheme. (h) as in (b) but for the DUN scheme with NH<sub>3</sub> set to 0 (DUN<sub>NH3=0</sub>). (i) as in (c) but for the DUN scheme. (j) as in (i) but with varying organics for condensation growth. The table presents the *NME* results for the corresponding size distributions in panel (a) and associated initial mixing ratios of gas-phase precursors.**



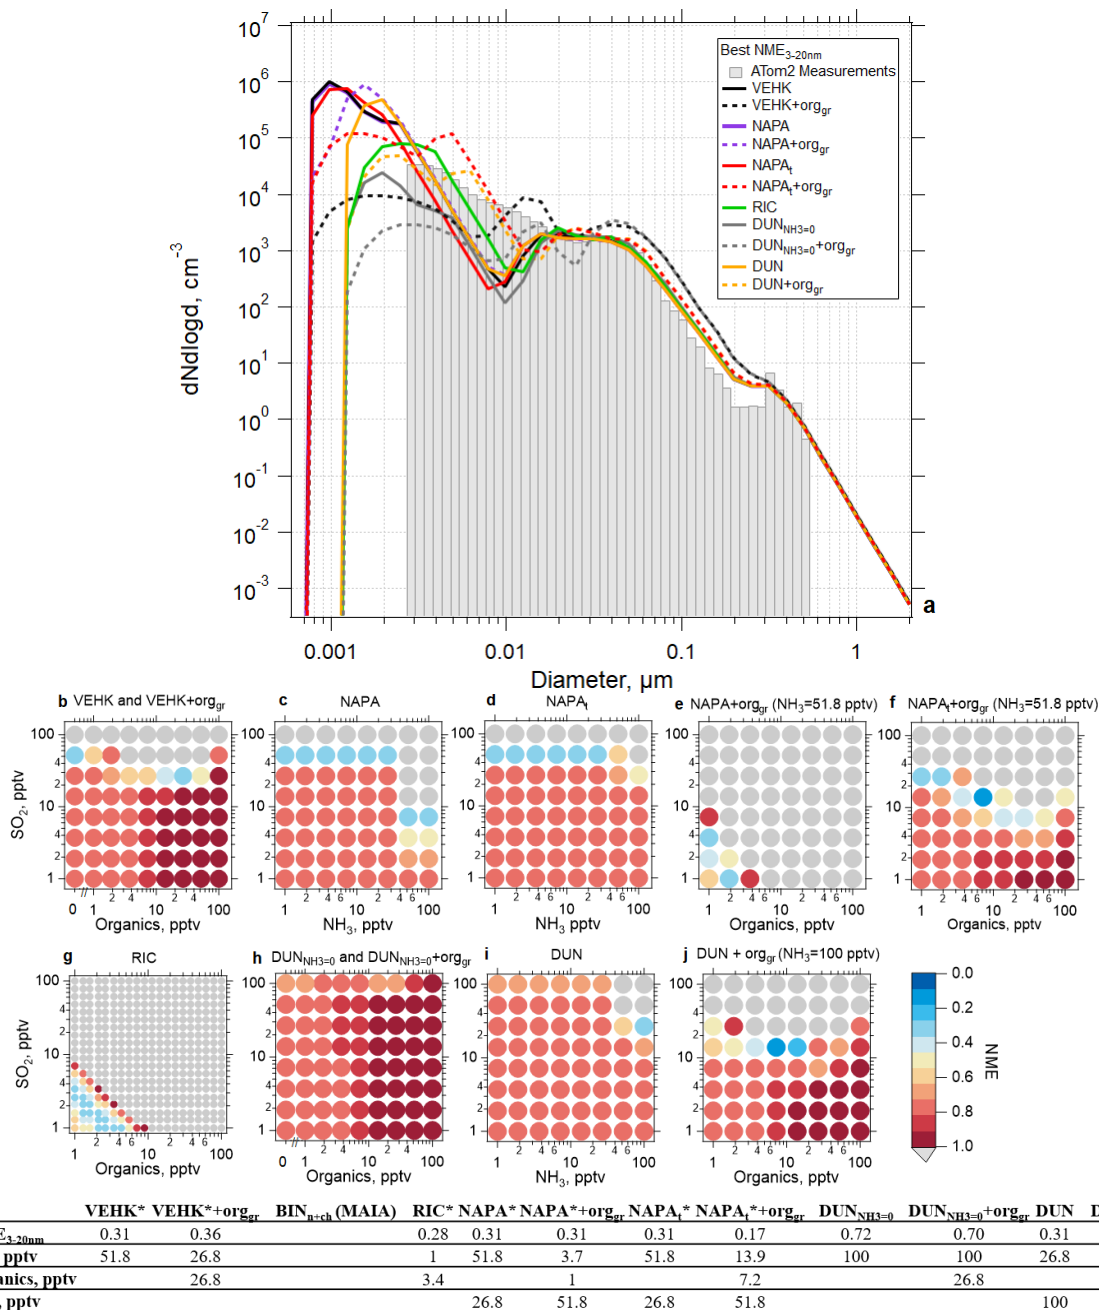

Figure S23: Results of simulations using the TOMAS box model for case sd470 (ATom 2, 2017-02-04, 02:49:31-02:50:30 UTC) where measurements were made 4.5 hours following convective influence, and temperature along the trajectory varied between 223 and 226 K. (a) Observed (shaded bars) and simulated (lines) aerosol size distributions with best normalized mean error (NME) for each of the NPF and growth schemes investigated. (b) NME between the modeled and measured size distribution for the VEHK scheme with varying organics mixing ratios for condensational growth. The color of the circle indicates the value of NME corresponding to a particular initial mixing ratio of SO<sub>2</sub>, NH<sub>3</sub>, or organics that varied between 0 and 100 pptv. Blue represents the best agreement, red poorer agreement, and grey the worst (NME >1). There were 64 sensitivity tests. (c) As in (b), but for the NAPA scheme. (d) As in (c), but for the NAPAt scheme. (e) and (f) as in (c) and (d) respectively, but with NH<sub>3</sub> fixed and varying organics for condensation growth. (g) as in (b) but for the RIC scheme, which provides the lowest NME. There were 400 sensitivity tests for this scheme. (h) as in (b) but for the DUN scheme with NH<sub>3</sub> set to 0 (DUN<sub>NH3=0</sub>). (i) as in (c) but for the DUN scheme. (j) as in (i) but with varying organics for condensation growth. The table presents the NME results for the corresponding size distributions in panel (a) and associated initial mixing ratios of gas-phase precursors.

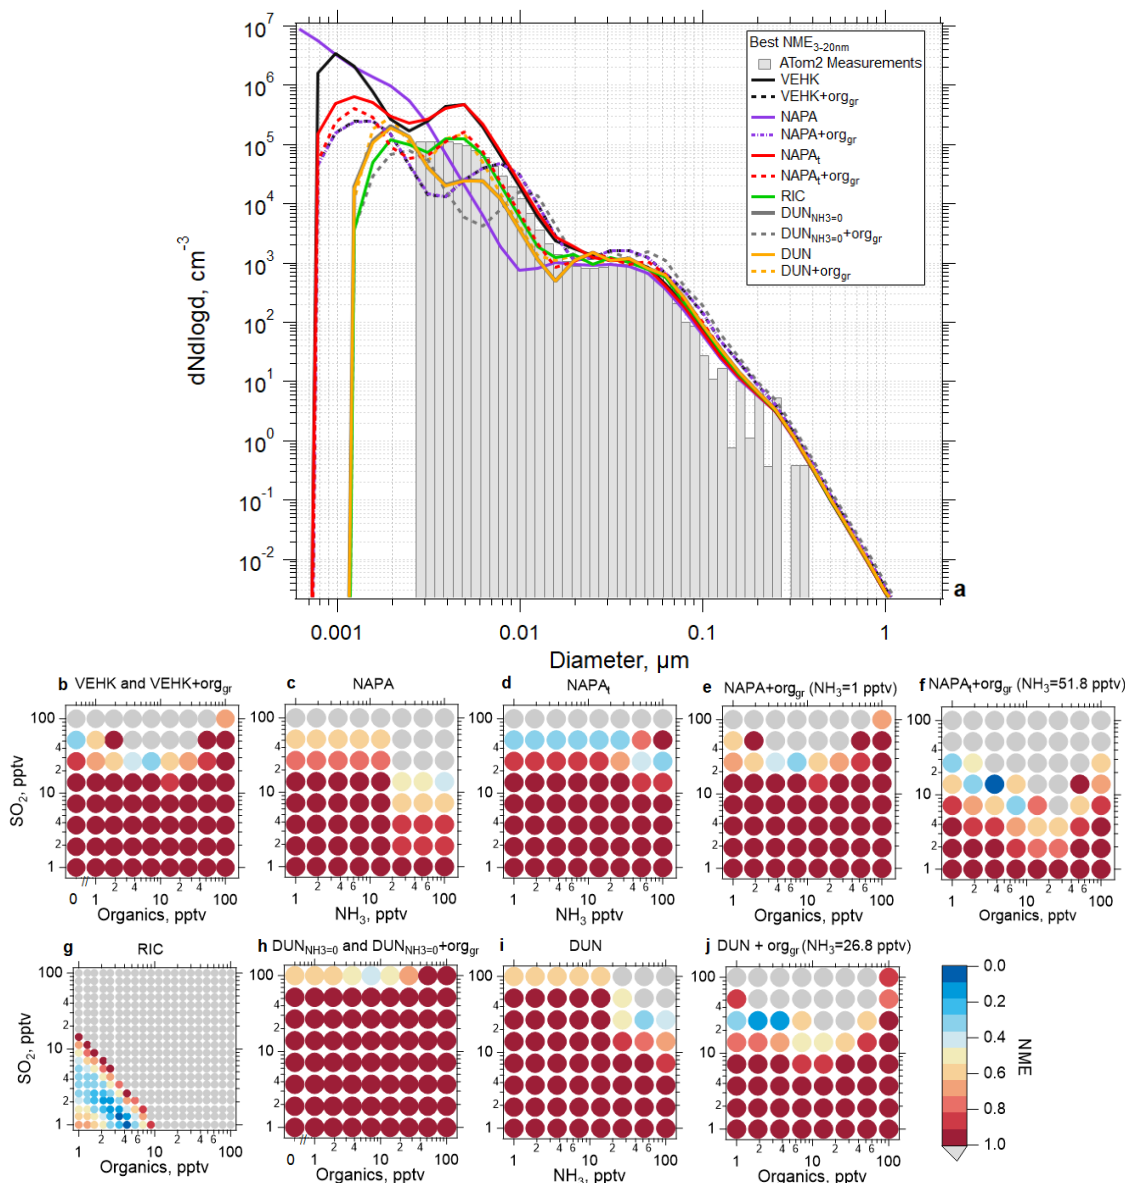

|                        | VEHK* | VEHK*+org <sub>gr</sub> | BIN <sub>n-ch</sub> (MAIA) | RIC* | NAPA* | NAPA*+org <sub>gr</sub> | NAPAt* | NAPAt*+org <sub>gr</sub> | DUN <sub>NH3=0</sub> | DUN <sub>NH3=0</sub> +org <sub>gr</sub> | DUN  | DUN+org <sub>gr</sub> |
|------------------------|-------|-------------------------|----------------------------|------|-------|-------------------------|--------|--------------------------|----------------------|-----------------------------------------|------|-----------------------|
| NME <sub>3-20nm</sub>  | 0.35  | 0.32                    |                            | 0.05 | 0.45  | 0.32                    | 0.29   | 0.02                     | 0.61                 | 0.45                                    | 0.29 | 0.11                  |
| SO <sub>2</sub> , pptv | 100   | 26.8                    |                            | 1.3  | 13.9  | 26.8                    | 100    | 13.9                     | 100                  | 100                                     | 26.8 | 26.8                  |
| Organics, pptv         |       | 7.2                     |                            | 3.4  |       | 7.2                     |        | 3.7                      |                      | 7.2                                     |      | 1.9                   |
| NH <sub>3</sub> , pptv |       |                         |                            |      | 100   | 1                       | 100    | 51.8                     |                      |                                         | 51.8 | 26.8                  |

\*Temperature along the trajectory does not lie within the temperature range of the scheme

**Figure S24: Results of simulations using the TOMAS box model for case sd477 (ATom 2, 2017-02-04, 02:56:31-02:57:30 UTC) where measurements were made 10.5 hours following convective influence, and temperature along the trajectory varied between 220 and 226 K. (a) Observed (shaded bars) and simulated (lines) aerosol size distributions with best normalized mean error (NME) for each of the NPF and growth schemes investigated. (b) NME between the modeled and measured size distribution for the VEHK scheme with varying organics mixing ratios for condensational growth. The color of the circle indicates the value of NME corresponding to a particular initial mixing ratio of SO<sub>2</sub>, NH<sub>3</sub>, or organics that varied between 0 and 100 pptv. Blue represents the best agreement, red poorer agreement, and grey the worst (NME >1). There were 64 sensitivity tests. (c) As in (b), but for the NAPA scheme. (d) As in (c), but for the NAPAt scheme. (e) and (f) as in (c) and (d) respectively, but with NH<sub>3</sub> fixed and varying organics for condensation growth. (g) as in (b) but for the RIC scheme, which provides the lowest NME. There were 400 sensitivity tests for this scheme. (h) as in (b) but for the DUN scheme with NH<sub>3</sub> set to 0 (DUN<sub>NH3=0</sub>). (i) as in (c) but for the DUN scheme. (j) as in (i) but with varying organics for condensation growth. The table presents the NME results for the corresponding size distributions in panel (a) and associated initial mixing ratios of gas-phase precursors.**

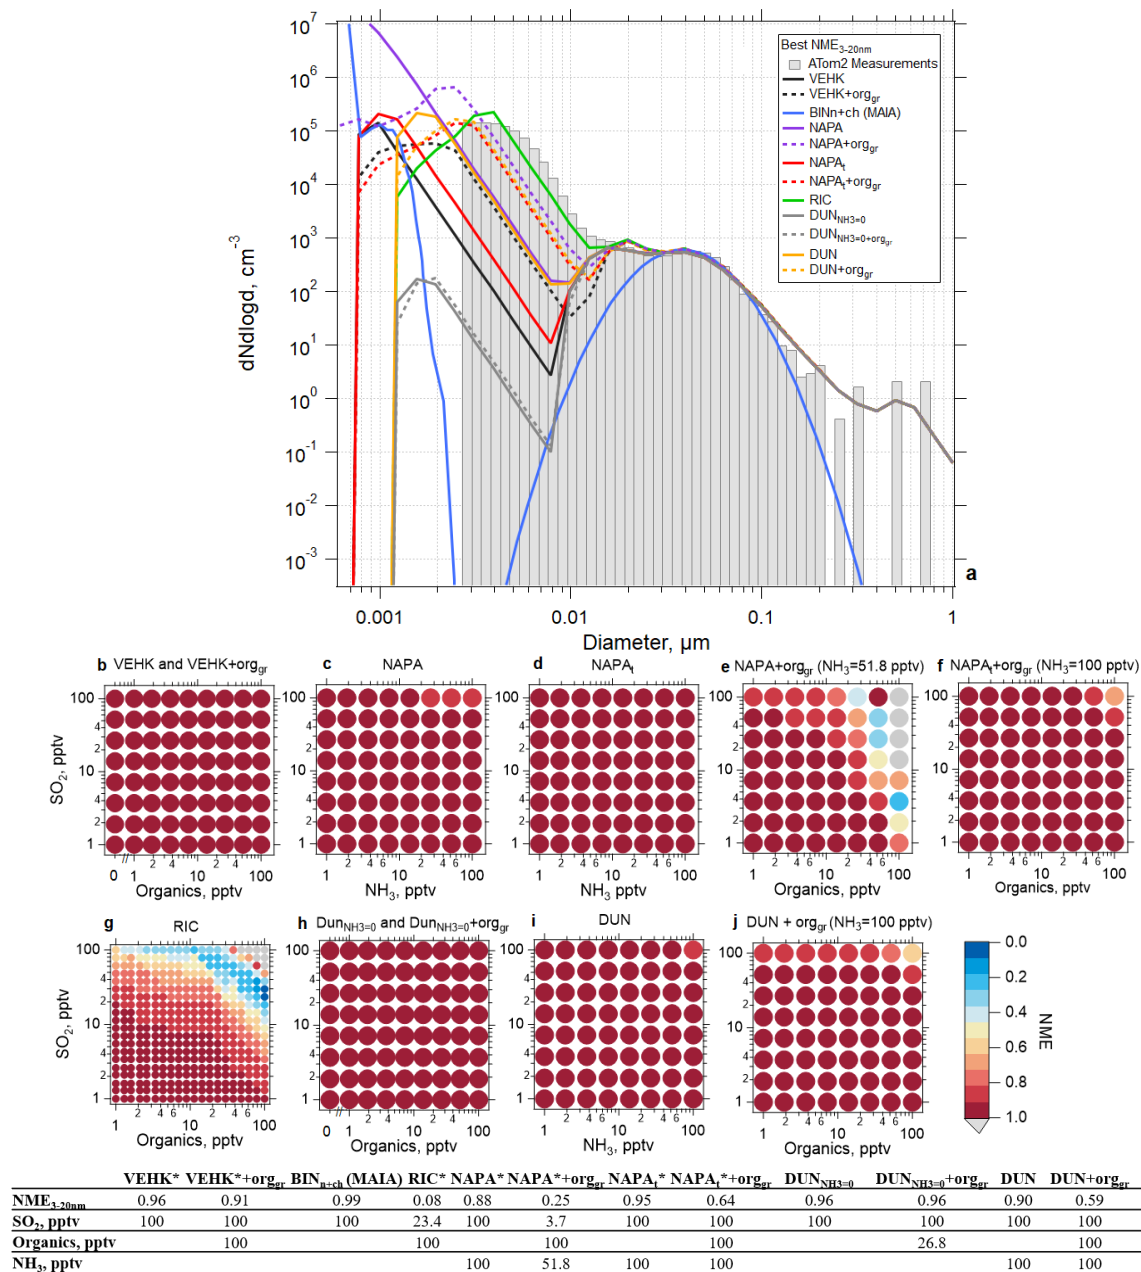

**Figure S25: Results of simulations using the TOMAS box model for case sd491 (ATom 2, 2017-02-40, 03:10:31-03:11:30 UTC) where measurements were made 0.4 hour following convective influence, and temperature along the trajectory varied around 226 K. (a) Observed (shaded bars) and simulated (lines) aerosol size distributions with best normalized mean error (*NME*) for each of the NPF and growth schemes investigated. Best results from the MAIA box model ion-assisted + neutral binary nucleation scheme shown as a blue line. (b) *NME* between the modeled and measured size distribution for the VEHK scheme with varying organics mixing ratios for condensational growth. The color of the circle indicates the value of *NME* corresponding to a particular initial mixing ratio of SO<sub>2</sub>, NH<sub>3</sub>, or organics that varied between 0 and 100 pptv. Blue represents the best agreement, red poorer agreement, and grey the worst (*NME* >1). There were 64 sensitivity tests. (c) As in (b), but for the NAPA scheme. (d) As in (c), but for the NAPAt scheme. (e) and (f) as in (c) and (d) respectively, but with NH<sub>3</sub> fixed and varying organics for condensation growth. (g) as in (b) but for the RIC scheme, which provides the lowest *NME*. There were 400 sensitivity tests for this scheme. (h) as in (b) but for the DUN scheme with NH<sub>3</sub> set to 0 (DUN<sub>NH3=0</sub>). (i) as in (c) but for the DUN scheme. (j) as in (i) but with varying organics for condensation growth. The table presents the *NME* results for the corresponding size distributions in panel (a) and associated initial mixing ratios of gas-phase precursors.**

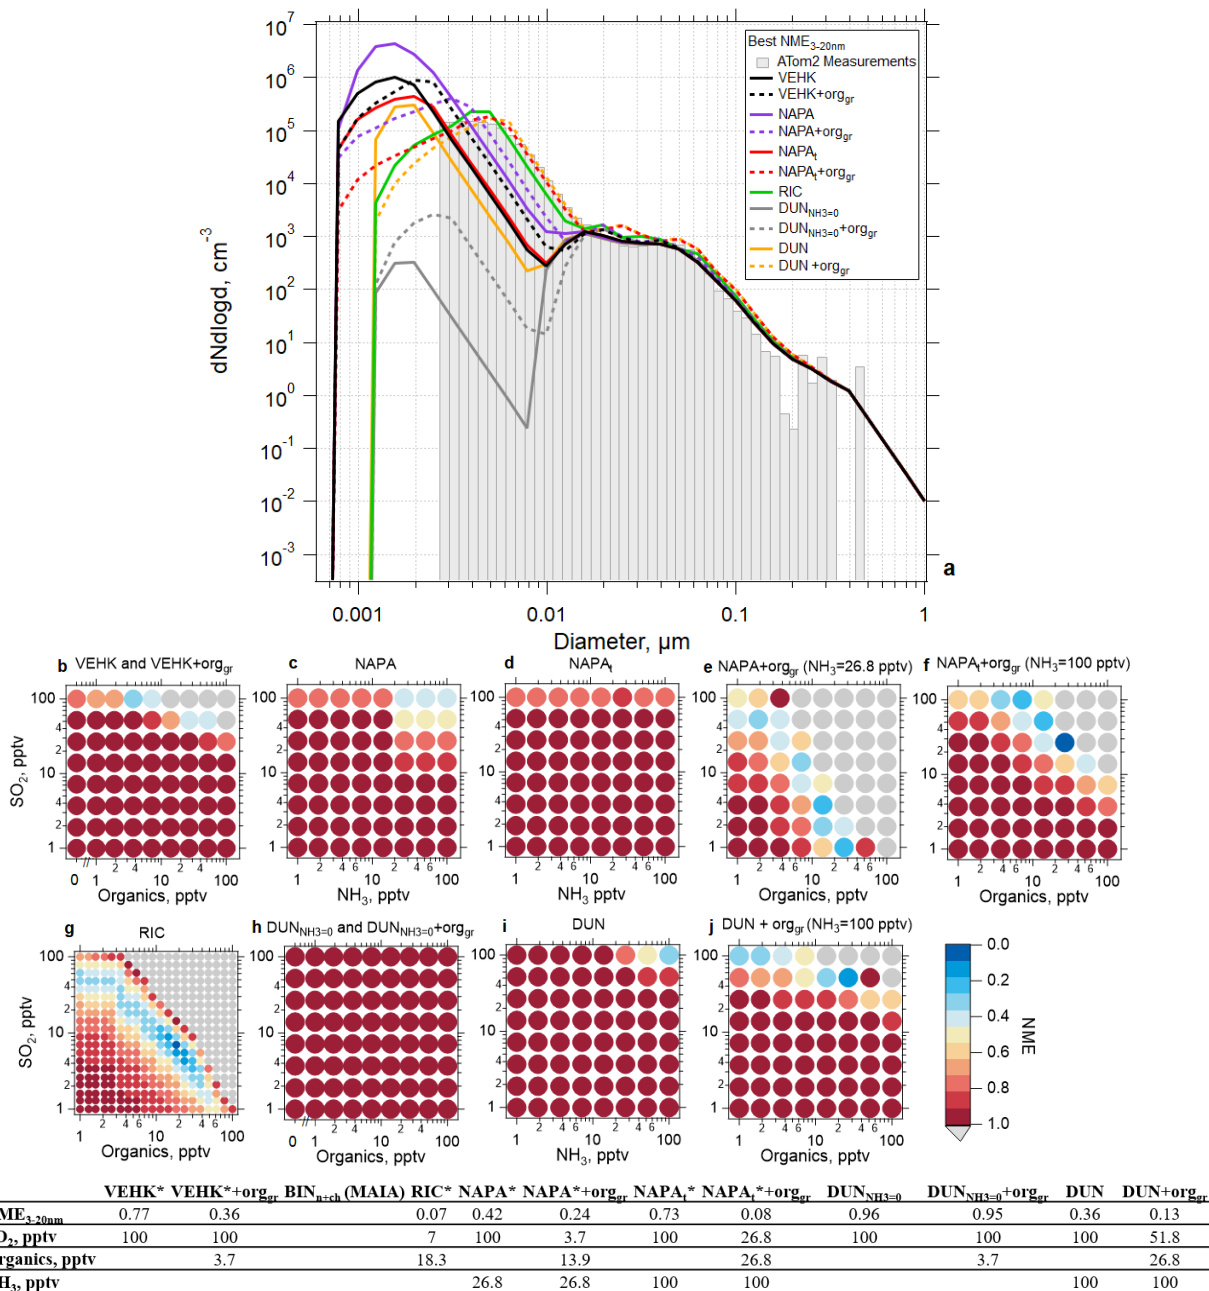

**Figure S26: Results of simulations using the TOMAS box model for case sd496 (ATom 2, 2017-02-04, 03:15:31-03:16:30 UTC) where measurements were made 1.48 hours following convective influence, and temperature along the trajectory varied between 226 and 230 K. (a) Observed (shaded bars) and simulated (lines) aerosol size distributions with best normalized mean error (NME) for each of the NPF and growth schemes investigated. (b) NME between the modeled and measured size distribution for the VEHK scheme with varying organics mixing ratios for condensational growth. The color of the circle indicates the value of NME corresponding to a particular initial mixing ratio of SO<sub>2</sub>, NH<sub>3</sub>, or organics that varied between 0 and 100 pptv. Blue represents the best agreement, red poorer agreement, and grey the worst (NME >1). There were 64 sensitivity tests. (c) As in (b), but for the NAPA scheme. (d) As in (c), but for the NAPAt scheme. (e) and (f) as in (c) and (d) respectively, but with NH<sub>3</sub> fixed and varying organics for condensation growth. (g) as in (b) but for the RIC scheme, which provides the lowest NME. There were 400 sensitivity tests for this scheme. (h) as in (b) but for the DUN scheme with NH<sub>3</sub> set to 0 (DUN<sub>NH3=0</sub>). (i) as in (c) but for the DUN scheme. (j) as in (i) but with varying organics for condensation growth. The table presents the NME results for the corresponding size distributions in panel (a) and associated initial mixing ratios of gas-phase precursors.**



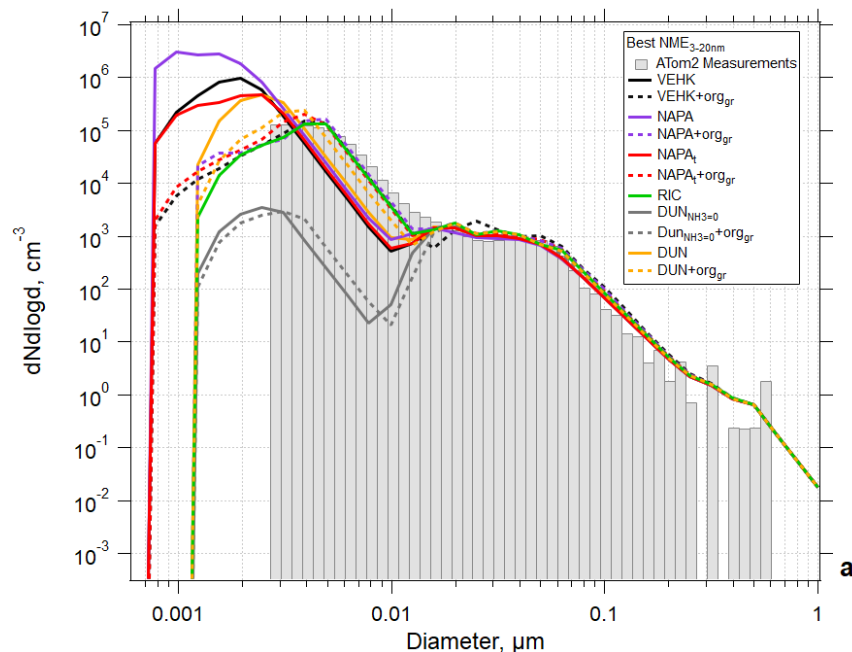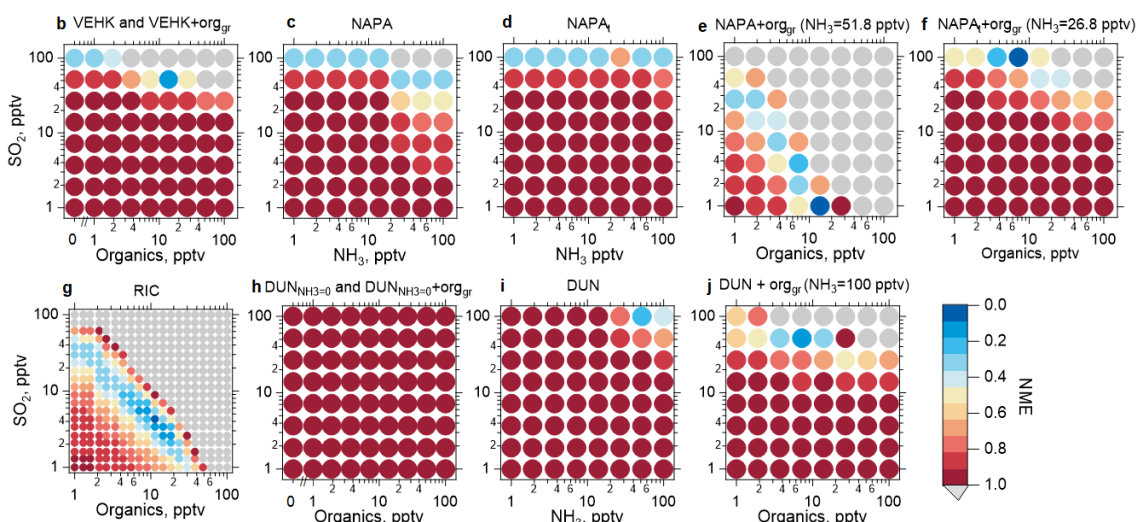

|                        | VEHK* | VEHK*+org <sub>gr</sub> | BIN <sub>N=ch</sub> (MAIA) | RIC* | NAPA* | NAPA*+org <sub>gr</sub> | NAPA <sub>t</sub> * | NAPA <sub>t</sub> *+org <sub>gr</sub> | DUN <sub>NH3=0</sub> | DUN <sub>NH3=0</sub> +org <sub>gr</sub> | DUN  | DUN+org <sub>gr</sub> |
|------------------------|-------|-------------------------|----------------------------|------|-------|-------------------------|---------------------|---------------------------------------|----------------------|-----------------------------------------|------|-----------------------|
| NME <sub>3-20nm</sub>  | 0.33  | 0.11                    |                            | 0.06 | 0.32  | 0.02                    | 0.32                | 0.06                                  | 0.92                 | 0.92                                    | 0.25 | 0.14                  |
| SO <sub>2</sub> , pptv | 100   | 51.8                    |                            | 4.3  | 51.8  | 1                       | 100                 | 100                                   | 100                  | 100                                     | 100  | 51.8                  |
| Organics, pptv         |       | 13.9                    |                            | 11.3 |       | 13.9                    |                     | 7.2                                   |                      | 1.9                                     |      | 7.2                   |
| NH <sub>3</sub> , pptv |       |                         |                            |      | 26.8  | 51.8                    | 100                 | 26.8                                  |                      |                                         | 51.8 | 100                   |

\*Temperature along the trajectory does not lie within the temperature range of the scheme

**Figure S27: Results of simulations using the TOMAS box model for case sd498 (ATom 2, 2017-02-04, 03:17:31-03:18:30 UTC) where measurements were made 1.95 hours following convective influence, and temperature along the trajectory varied between 226 and 232 K. (a) Observed (shaded bars) and simulated (lines) aerosol size distributions with best normalized mean error (NME) for each of the NPF and growth schemes investigated. (b) NME between the modeled and measured size distribution for the VEHK scheme with varying organics mixing ratios for condensational growth. The color of the circle indicates the value of NME corresponding to a particular initial mixing ratio of SO<sub>2</sub>, NH<sub>3</sub>, or organics that varied between 0 and 100 pptv. Blue represents the best agreement, red poorer agreement, and grey the worst (NME >1). There were 64 sensitivity tests. (c) As in (b), but for the NAPA scheme. (d) As in (c), but for the NAPAt scheme. (e) and (f) as in (c) and (d) respectively, but with NH<sub>3</sub> fixed and varying organics for condensation growth. (g) as in (b) but for the RIC scheme, which provides the lowest NME. There were 400 sensitivity tests for this scheme. (h) as in (b) but for the DUN scheme with NH<sub>3</sub> set to 0 (DUN<sub>NH3=0</sub>). (i) as in (c) but for the DUN scheme. (j) as in (i) but with varying organics for condensation growth. The table presents the NME results for the corresponding size distributions in panel (a) and associated initial mixing ratios of gas-phase precursors.**

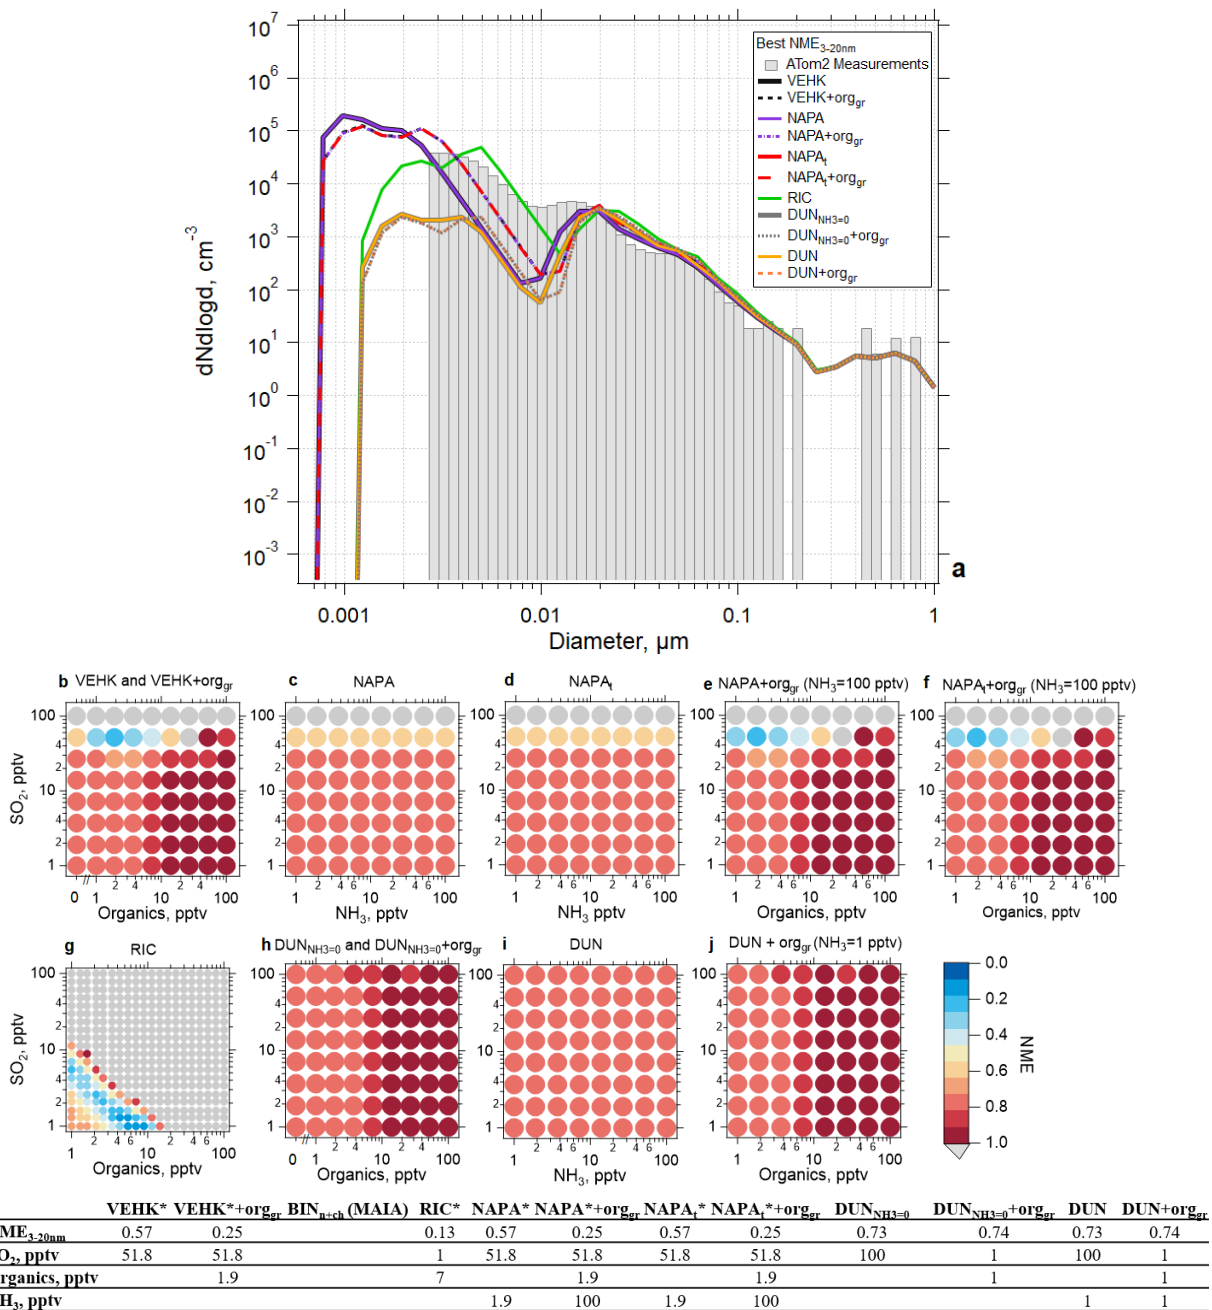

Figure S28: Results of simulations using the TOMAS box model for case sd530 (ATom 2, 2017-02-04, 03:49:31-03:50:30 UTC) where measurements were made 3.72 hours following convective influence, and temperature along the trajectory varied between 228 and 236 K. (a) Observed (shaded bars) and simulated (lines) aerosol size distributions with best normalized mean error (NME) for each of the NPF and growth schemes investigated. (b) NME between the modeled and measured size distribution for the VEHK scheme with varying organics mixing ratios for condensational growth. The color of the circle indicates the value of NME corresponding to a particular initial mixing ratio of SO<sub>2</sub>, NH<sub>3</sub>, or organics that varied between 0 and 100 pptv. Blue represents the best agreement, red poorer agreement, and grey the worst (NME >1). There were 64 sensitivity tests. (c) As in (b), but for the NAPA scheme. (d) As in (c), but for the NAPAt scheme. (e) and (f) as in (c) and (d) respectively, but with NH<sub>3</sub> fixed and varying organics for condensation growth. (g) as in (b) but for the RIC scheme, which provides the lowest NME. There were 400 sensitivity tests for this scheme. (h) as in (b) but for the DUN scheme with NH<sub>3</sub> set to 0 (DUN<sub>NH3=0</sub>). (i) as in (c) but for the DUN scheme. (j) as in (i) but with varying organics for condensation growth. The table presents the NME results for the corresponding size distributions in panel (a) and associated initial mixing ratios of gas-phase precursors.

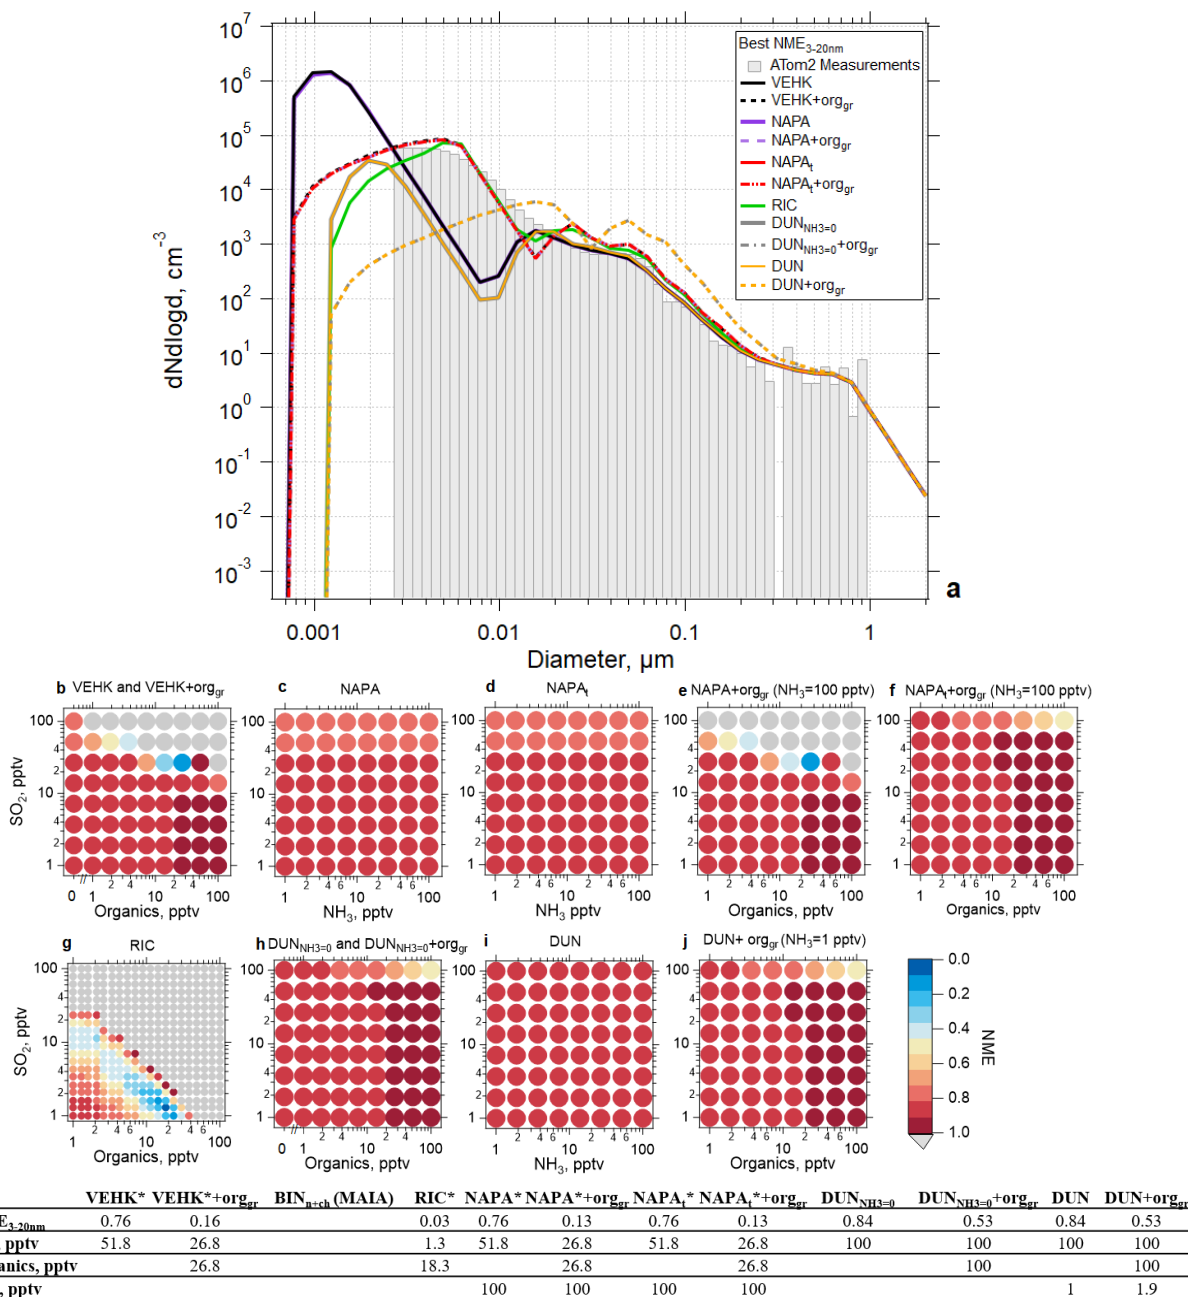

**Figure S29:** Results of simulations using the TOMAS box model for case sd533 (ATom 2, 2017-02-04, 03:52:31-03:53:30 UTC) where measurements were made 2.9 hours following convective influence, and temperature along the trajectory varied between 228 and 230 K. (a) Observed (shaded bars) and simulated (lines) aerosol size distributions with best normalized mean error (NME) for each of the NPF and growth schemes investigated. (b) NME between the modeled and measured size distribution for the VEHK scheme with varying organics mixing ratios for condensational growth. The color of the circle indicates the value of NME corresponding to a particular initial mixing ratio of SO<sub>2</sub>, NH<sub>3</sub>, or organics that varied between 0 and 100 pptv. Blue represents the best agreement, red poorer agreement, and grey the worst (NME >1). There were 64 sensitivity tests. (c) As in (b), but for the NAPA scheme. (d) As in (c), but for the NAPAt scheme. (e) and (f) as in (c) and (d) respectively, but with NH<sub>3</sub> fixed and varying organics for condensation growth. (g) as in (b) but for the RIC scheme, which provides the lowest NME. There were 400 sensitivity tests for this scheme. (h) as in (b) but for the DUN scheme with NH<sub>3</sub> set to 0 (DUN<sub>NH3=0</sub>). (i) as in (c) but for the DUN scheme. (j) as in (i) but with varying organics for condensation growth. The table presents the NME results for the corresponding size distributions in panel (a) and associated initial mixing ratios of gas-phase precursors.

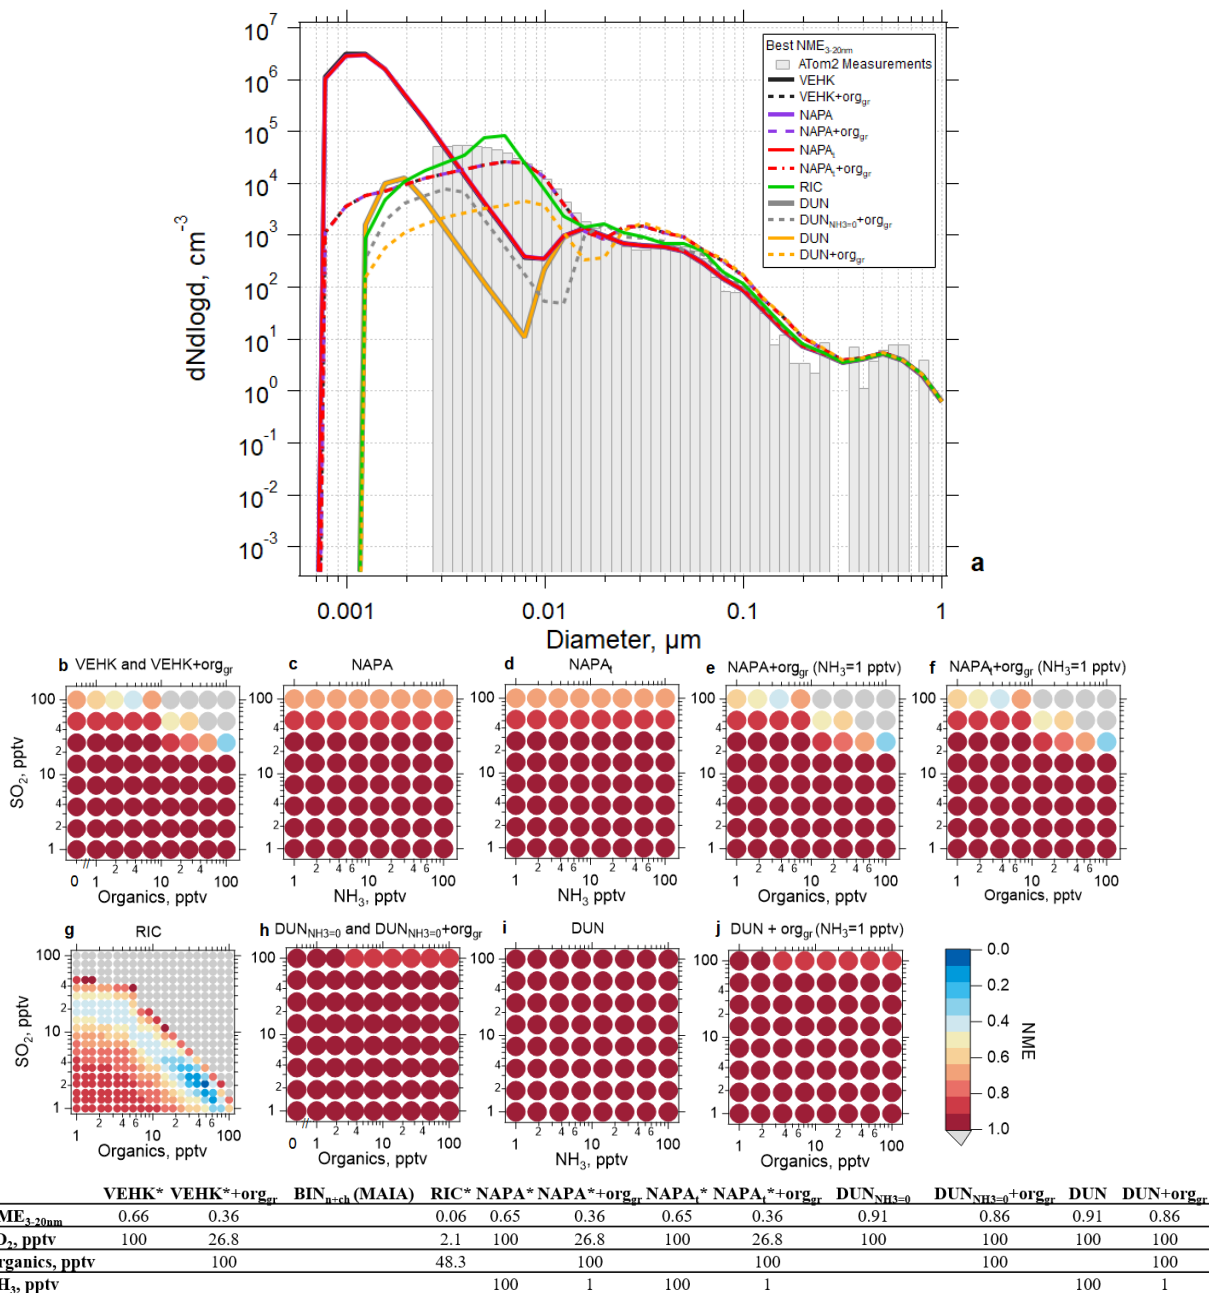

**Figure S30: Results of simulations using the TOMAS box model for case sd535 (ATom 2, 2017-02-04, 03:54:31-03:55:30 UTC) where measurements were made 1.88 hours following convective influence, and temperature along the trajectory varied around 228 K. (a) Observed (shaded bars) and simulated (lines) aerosol size distributions with best normalized mean error ( $NME$ ) for each of the NPF and growth schemes investigated. (b)  $NME$  between the modeled and measured size distribution for the VEHK scheme with varying organics mixing ratios for condensational growth. The color of the circle indicates the value of  $NME$  corresponding to a particular initial mixing ratio of SO<sub>2</sub>, NH<sub>3</sub>, or organics that varied between 0 and 100 pptv. Blue represents the best agreement, red poorer agreement, and grey the worst ( $NME > 1$ ). There were 64 sensitivity tests. (c) As in (b), but for the NAPA scheme. (d) As in (c), but for the NAPA<sub>A</sub> scheme. (e) and (f) as in (c) and (d) respectively, but with NH<sub>3</sub> fixed and varying organics for condensation growth. (g) as in (b) but for the RIC scheme, which provides the lowest  $NME$ . There were 400 sensitivity tests for this scheme. (h) as in (b) but for the DUN scheme with NH<sub>3</sub> set to 0 (DUN<sub>NH3=0</sub>). (i) as in (c) but for the DUN scheme. (j) as in (i) but with varying organics for condensation growth. The table presents the  $NME$  results for the corresponding size distributions in panel (a) and associated initial mixing ratios of gas-phase precursors.**



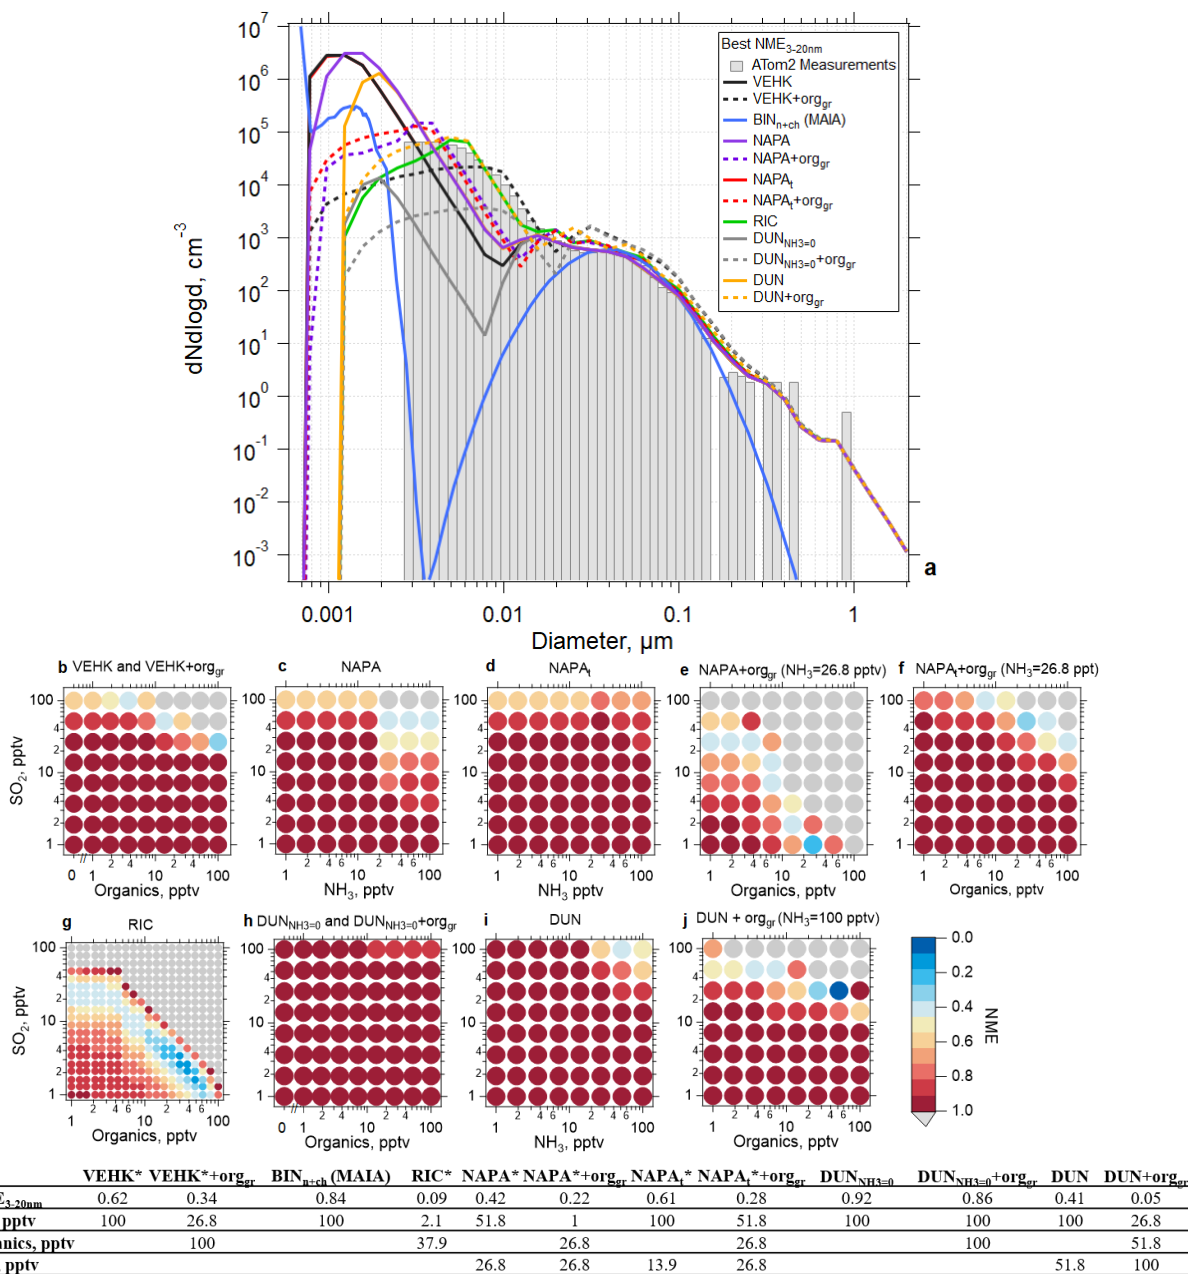

**Figure S31: Results of simulations using the TOMAS box model for case sd537 (ATom 2, 2017-02-04, 03:56:31-03:57:30 UTC) where measurements were made 1.7 hours following convective influence, and temperature along the trajectory varied around 228 K. (a) Observed (shaded bars) and simulated (lines) aerosol size distributions with best normalized mean error (*NME*) for each of the NPF and growth schemes investigated. Best results from the MAIA box model ion-assisted + neutral binary nucleation scheme shown as a blue line. (b) *NME* between the modeled and measured size distribution for the VEHK scheme with varying organics mixing ratios for condensational growth. The color of the circle indicates the value of *NME* corresponding to a particular initial mixing ratio of SO<sub>2</sub>, NH<sub>3</sub>, or organics that varied between 0 and 100 pptv. Blue represents the best agreement, red poorer agreement, and grey the worst (*NME* > 1). There were 64 sensitivity tests. (c) As in (b), but for the NAPA scheme. (d) As in (c), but for the NAPAt scheme. (e) and (f) as in (c) and (d) respectively, but with NH<sub>3</sub> fixed and varying organics for condensation growth. (g) as in (b) but for the RIC scheme, which provides the lowest *NME*. There were 400 sensitivity tests for this scheme. (h) as in (b) but for the DUN scheme with NH<sub>3</sub> set to 0 (DUN<sub>NH3=0</sub>). (i) as in (c) but for the DUN scheme. (j) as in (i) but with varying organics for condensation growth. The table presents the *NME* results for the corresponding size distributions in panel (a) and associated initial mixing ratios of gas-phase precursors.**

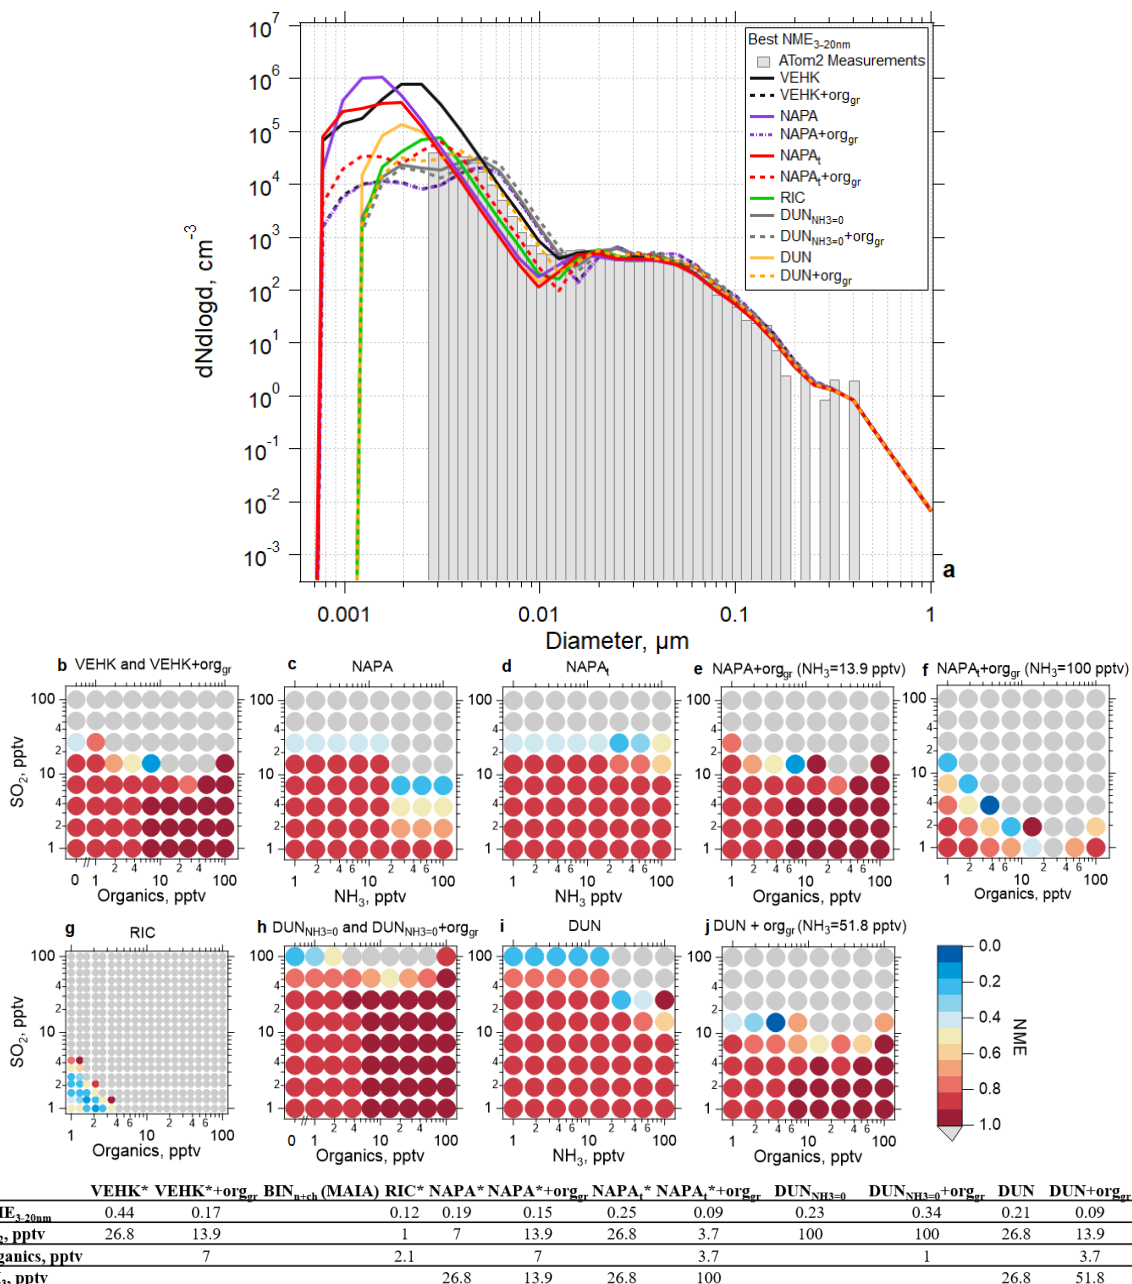

**Figure S32: Results of simulations using the TOMAS box model for case sd540 (ATom 2, 2017-02-04, 03:59:31-04:00:30 UTC) where measurements were made 3.4 hours following convective influence, and temperature along the trajectory varied between 228 and 231 K. (a) Observed (shaded bars) and simulated (lines) aerosol size distributions with best normalized mean error (*NME*) for each of the NPF and growth schemes investigated. Best results from the MAIA box model ion-assisted + neutral binary nucleation scheme shown as a blue line. (b) *NME* between the modeled and measured size distribution for the VEHK scheme with varying organics mixing ratios for condensational growth. The color of the circle indicates the value of *NME* corresponding to a particular initial mixing ratio of SO<sub>2</sub>, NH<sub>3</sub>, or organics that varied between 0 and 100 pptv. Blue represents the best agreement, red poorer agreement, and grey the worst (*NME* >1). There were 64 sensitivity tests. (c) As in (b), but for the NAPA scheme. (d) As in (c), but for the NAPAt scheme. (e) and (f) as in (c) and (d) respectively, but with NH<sub>3</sub> fixed and varying organics for condensational growth. (g) as in (b) but for the RIC scheme, which provides the lowest *NME*. There were 400 sensitivity tests for this scheme. (h) as in (b) but for the DUN scheme with NH<sub>3</sub> set to 0 (DUN<sub>NH3=0</sub>). (i) as in (c) but for the DUN scheme. (j) as in (i) but with varying organics for condensation growth. The table presents the *NME* results for the corresponding size distributions in panel (a) and associated initial mixing ratios of gas-phase precursors.**

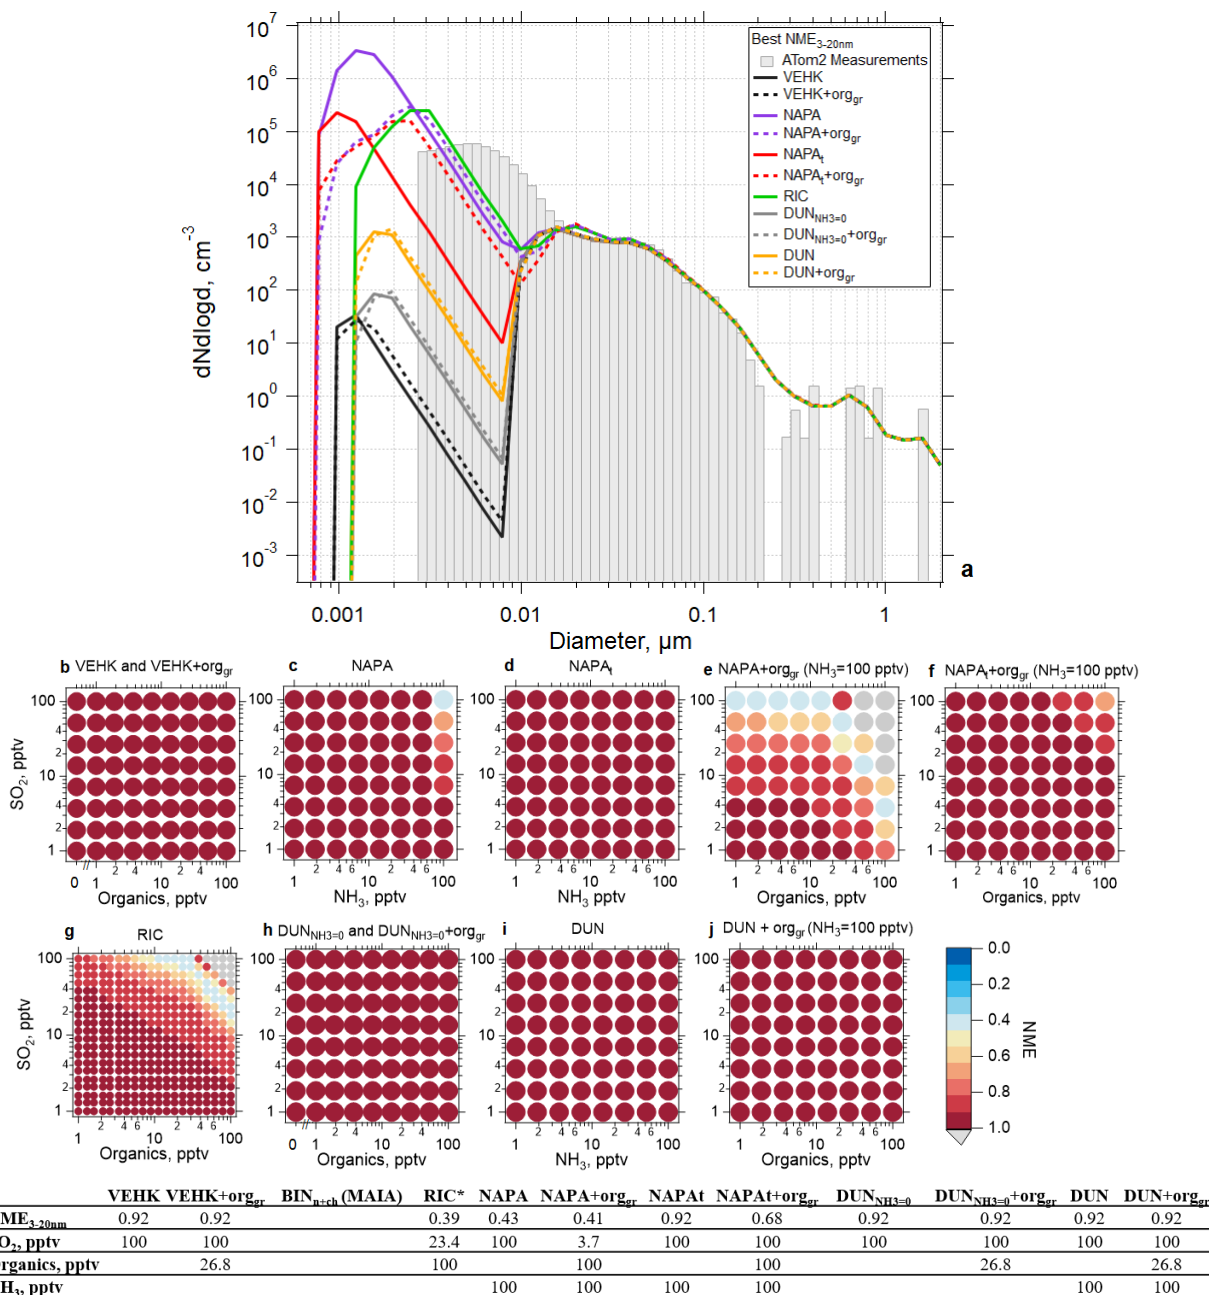

**Figure S33:** Results of simulations using the TOMAS box model for case sd543 (ATom 2, 2017-02-04, 03:02:31-03:03:30 UTC) where measurements were made 0.81 hour following convective influence, and temperature along the trajectory varied between 247 and 248 K. (a) Observed (shaded bars) and simulated (lines) aerosol size distributions with best normalized mean error (*NME*) for each of the NPF and growth schemes investigated. (b) *NME* between the modeled and measured size distribution for the VEHK scheme with varying organics mixing ratios for condensational growth. The color of the circle indicates the value of *NME* corresponding to a particular initial mixing ratio of SO<sub>2</sub>, NH<sub>3</sub>, or organics that varied between 0 and 100 pptv. Blue represents the best agreement, red poorer agreement, and grey the worst (*NME* > 1). There were 64 sensitivity tests. (c) As in (b), but for the NAPA scheme. (d) As in (c), but for the NAPAt scheme. (e) and (f) as in (c) and (d) respectively, but with NH<sub>3</sub> fixed and varying organics for condensation growth. (g) as in (b) but for the RIC scheme, which provides the lowest *NME*. There were 400 sensitivity tests for this scheme. (h) as in (b) but for the DUN scheme with NH<sub>3</sub> set to 0 (DUN<sub>NH3=0</sub>). (i) as in (c) but for the DUN scheme. (j) as in (i) but with varying organics for condensation growth. The table presents the *NME* results for the corresponding size distributions in panel (a) and associated initial mixing ratios of gas-phase precursors.

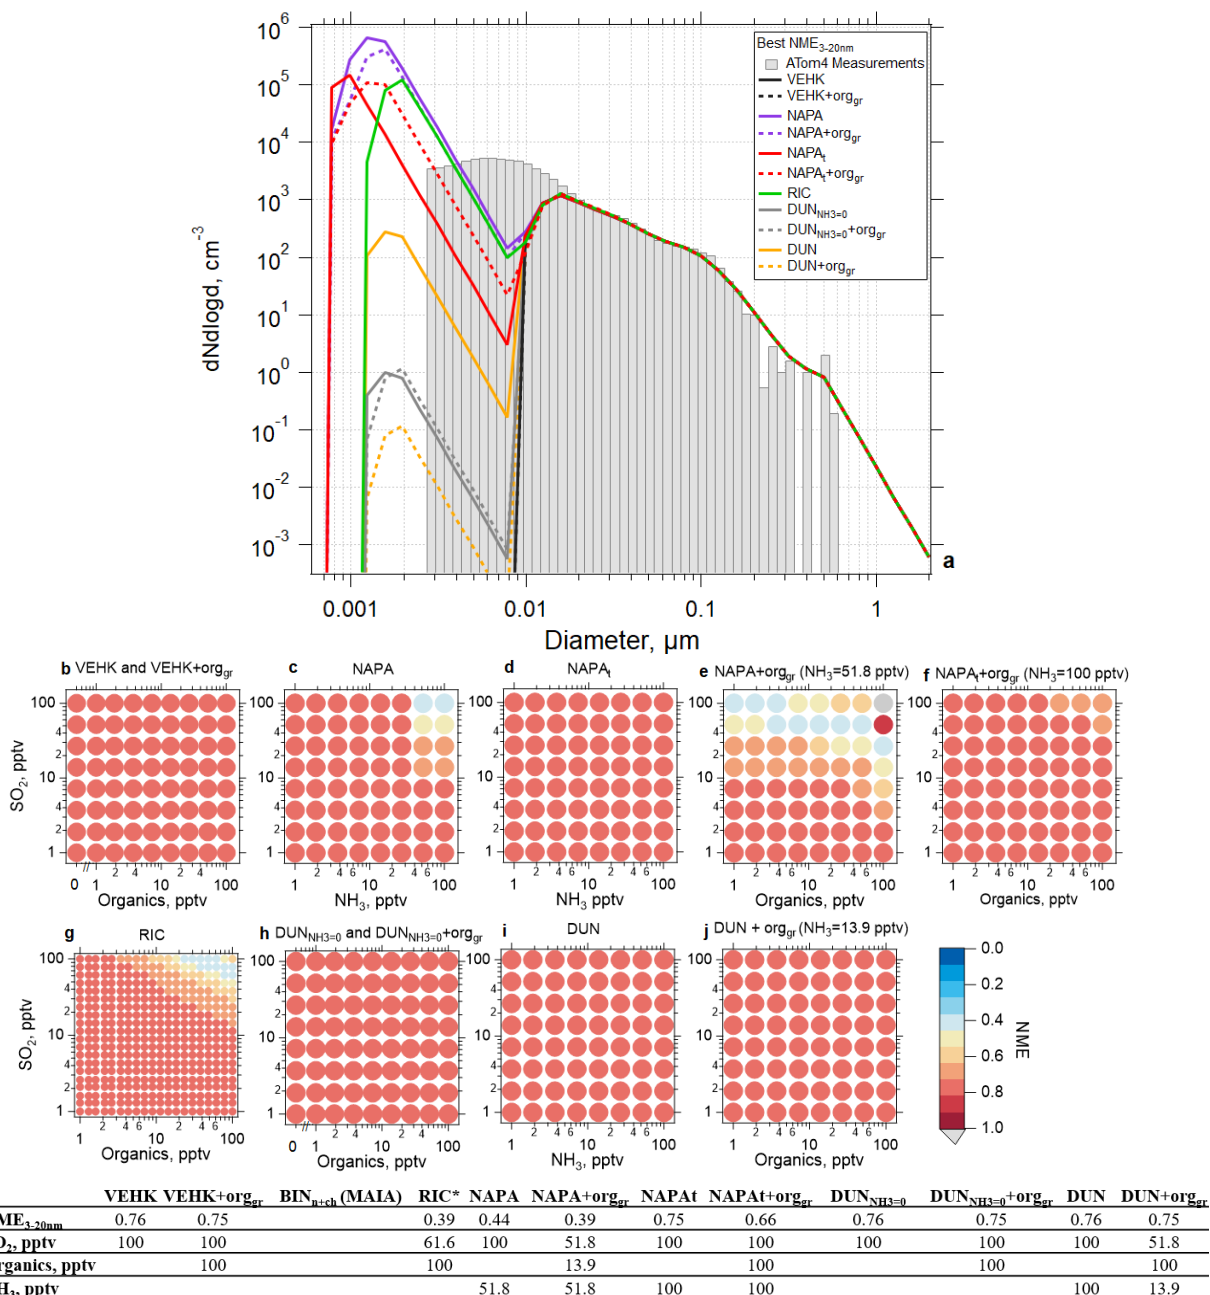

Figure S34: Results of simulations using the TOMAS box model for case sd22 (ATom 4, 2018-05-01, 19:17:31-19:18:30 UTC) where measurements were made 2.84 hours following convective influence, and temperature along the trajectory varied between 245 and 246 K. (a) Observed (shaded bars) and simulated (lines) aerosol size distributions with best normalized mean error (NME) for each of the NPF and growth schemes investigated. (b) NME between the modeled and measured size distribution for the VEHK scheme with varying organics mixing ratios for condensational growth. The color of the circle indicates the value of NME corresponding to a particular initial mixing ratio of SO<sub>2</sub>, NH<sub>3</sub>, or organics that varied between 0 and 100 pptv. Blue represents the best agreement, red poorer agreement, and grey the worst (NME >1). There were 64 sensitivity tests. (c) As in (b), but for the NAPA scheme. (d) As in (c), but for the NAPAt scheme. (e) and (f) as in (c) and (d) respectively, but with NH<sub>3</sub> fixed and varying organics for condensation growth. (g) as in (b) but for the RIC scheme, which provides the lowest NME. There were 400 sensitivity tests for this scheme. (h) as in (b) but for the DUN scheme with NH<sub>3</sub> set to 0 (DUN<sub>NH3=0</sub>). (i) as in (c) but for the DUN scheme. (j) as in (i) but with varying organics for condensation growth. The table presents the NME results for the corresponding size distributions in panel (a) and associated initial mixing ratios of gas-phase precursors.



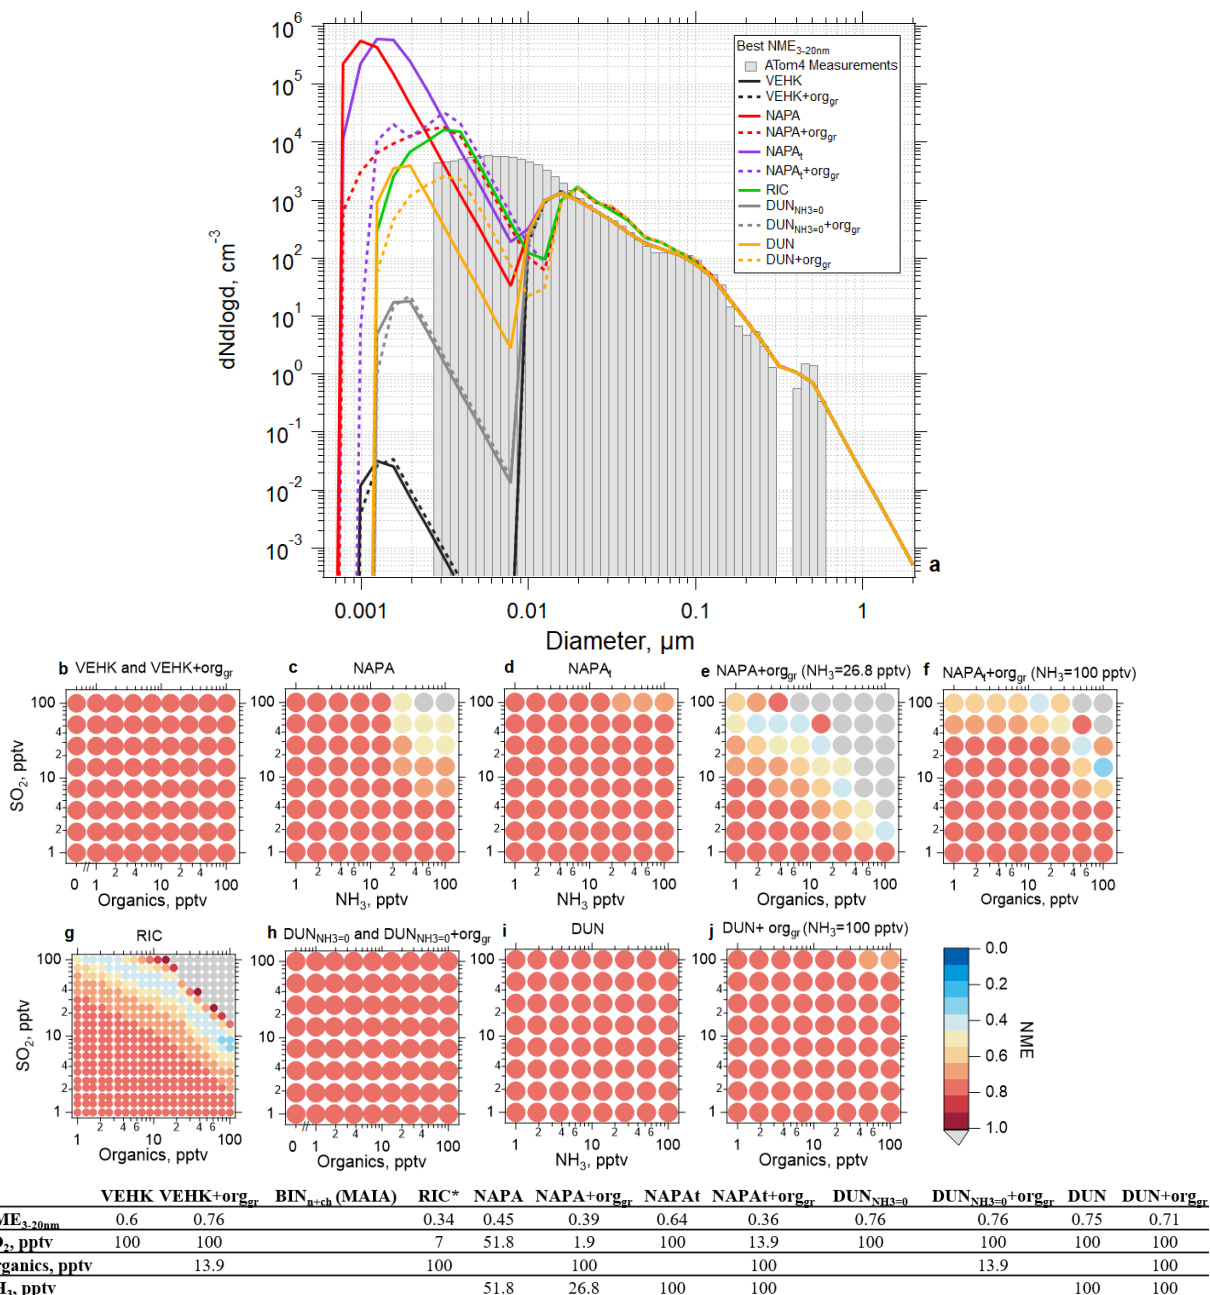

**Figure S35:** Results of simulations using the TOMAS box model for case sd32 (ATom 4, 2018-05-01, 19:27:31-19:28:30 UTC) where measurements were made 6.55 hours following convective influence, and temperature along the trajectory varied between 245 and 247 K. (a) Observed (shaded bars) and simulated (lines) aerosol size distributions with best normalized mean error (*NME*) for each of the NPF and growth schemes investigated. (b) *NME* between the modeled and measured size distribution for the VEHK scheme with varying organics mixing ratios for condensational growth. The color of the circle indicates the value of *NME* corresponding to a particular initial mixing ratio of SO<sub>2</sub>, NH<sub>3</sub>, or organics that varied between 0 and 100 pptv. Blue represents the best agreement, red poorer agreement, and grey the worst (*NME* >1). There were 64 sensitivity tests. (c) As in (b), but for the NAPA scheme. (d) As in (c), but for the NAPAt scheme. (e) and (f) as in (c) and (d) respectively, but with NH<sub>3</sub> fixed and varying organics for condensation growth. (g) as in (b) but for the RIC scheme, which provides the lowest *NME*. There were 400 sensitivity tests for this scheme. (h) as in (b) but for the DUN scheme with NH<sub>3</sub> set to 0 (DUN<sub>NH3=0</sub>). (i) as in (c) but for the DUN scheme. (j) as in (i) but with varying organics for condensation growth. The table presents the *NME* results for the corresponding size distributions in panel (a) and associated initial mixing ratios of gas-phase precursors.



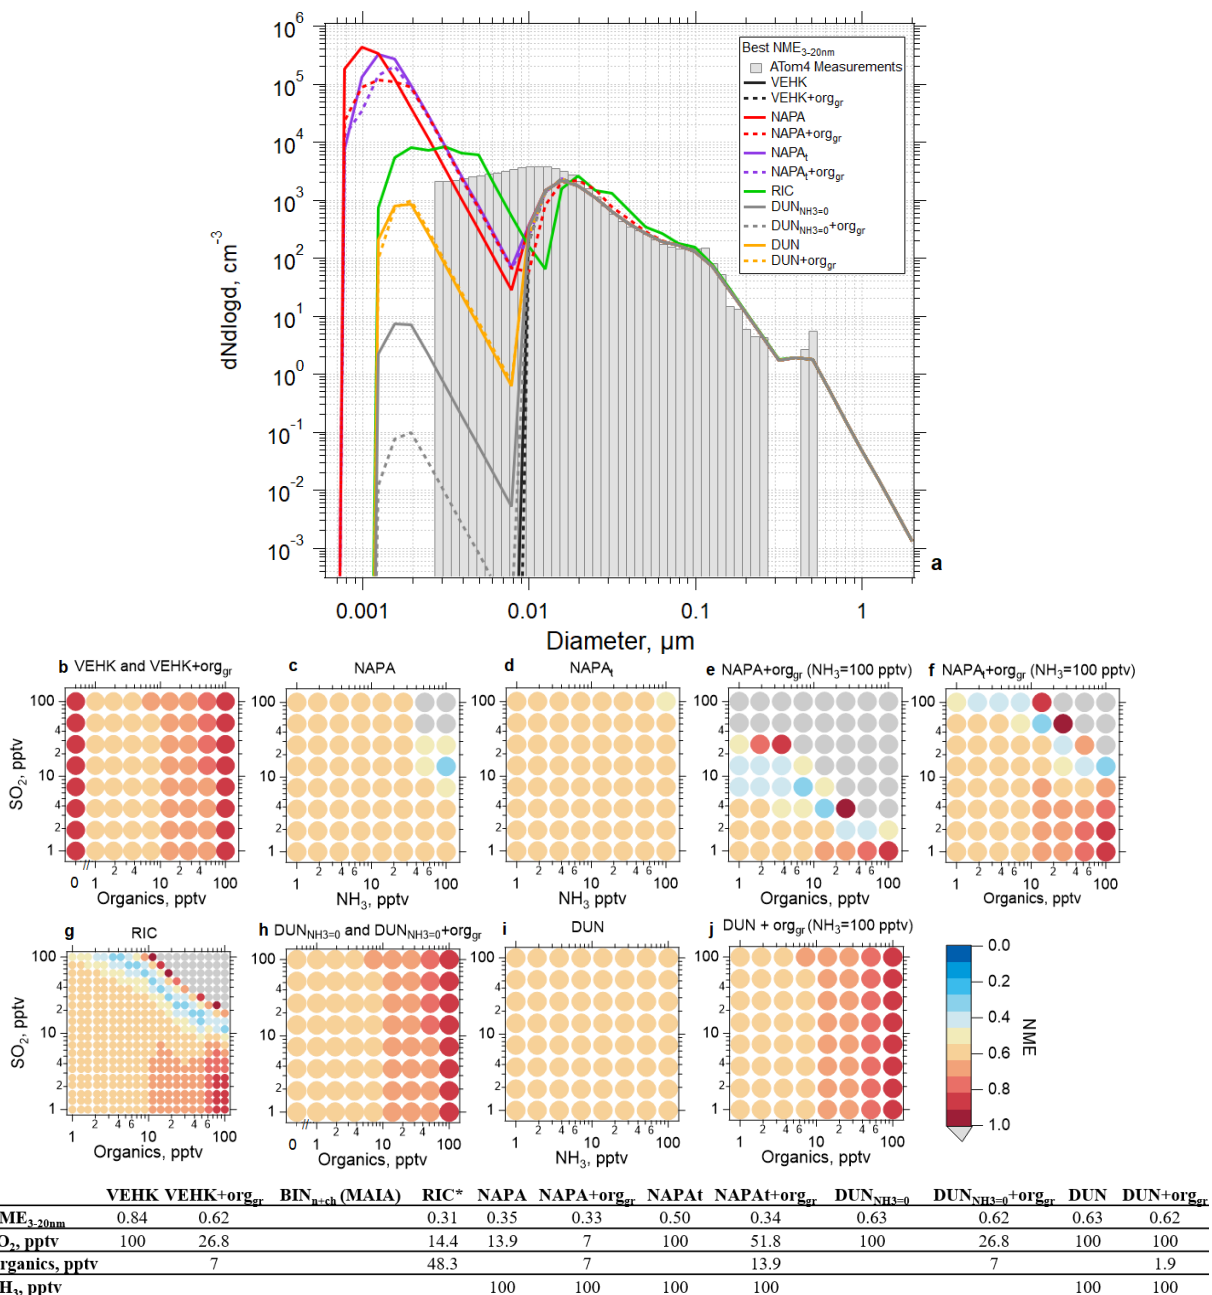

Figure S36: Results of simulations using the TOMAS box model for case sd72 (ATom 4, 2018-05-01, 20:07:31-20:18:30 UTC) where measurements were made 11.04 hours following convective influence, and temperature along the trajectory varied between 249 and 252 K. (a) Observed (shaded bars) and simulated (lines) aerosol size distributions with best normalized mean error (*NME*) for each of the NPF and growth schemes investigated. (b) *NME* between the modeled and measured size distribution for the VEHK scheme with varying organics mixing ratios for condensational growth. The color of the circle indicates the value of *NME* corresponding to a particular initial mixing ratio of SO<sub>2</sub>, NH<sub>3</sub>, or organics that varied between 0 and 100 pptv. Blue represents the best agreement, red poorer agreement, and grey the worst (*NME* >1). There were 64 sensitivity tests. (c) As in (b), but for the NAPA scheme. (d) As in (c), but for the NAPAt scheme. (e) and (f) as in (c) and (d) respectively, but with NH<sub>3</sub> fixed and varying organics for condensation growth. (g) as in (b) but for the RIC scheme, which provides the lowest *NME*. There were 400 sensitivity tests for this scheme. (h) as in (b) but for the DUN scheme with NH<sub>3</sub> set to 0 (DUN<sub>NH3=0</sub>). (i) as in (c) but for the DUN scheme. (j) as in (i) but with varying organics for condensation growth. The table presents the *NME* results for the corresponding size distributions in panel (a) and associated initial mixing ratios of gas-phase precursors.

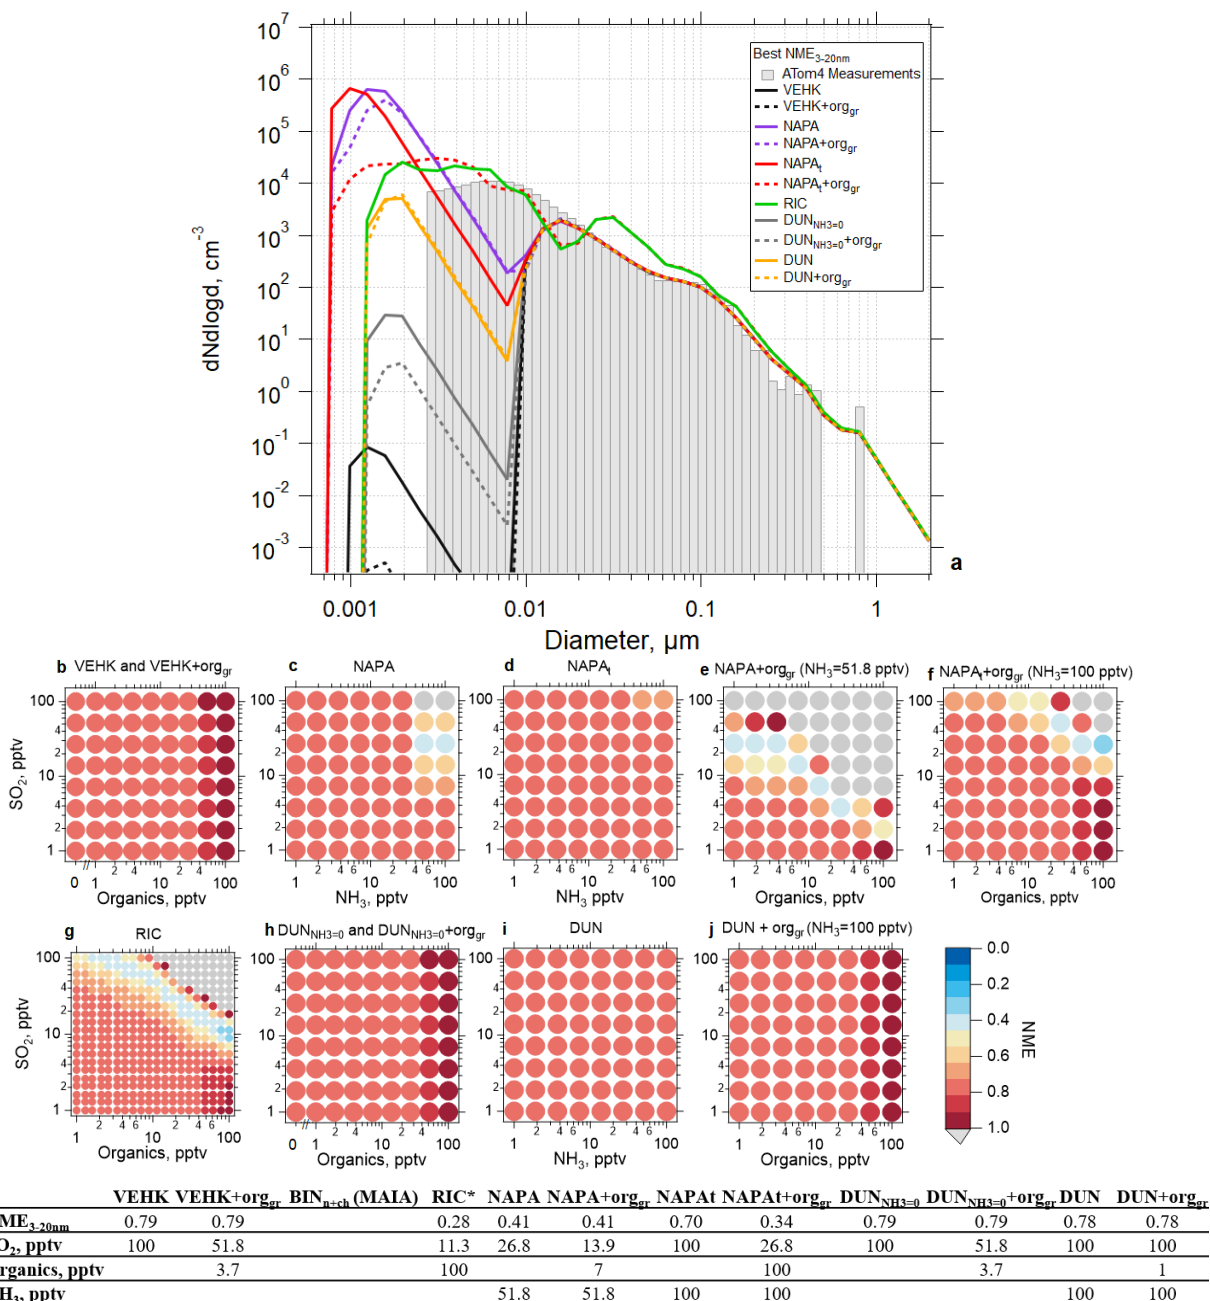

\*Temperature along the trajectory does not lie within the temperature range of the scheme

**Figure S37: Results of simulations using the TOMAS box model for case sd75 (ATom 4, 2018-05-01, 20:10:31-20:10:30 UTC) where measurements were made 11.99 hours following convective influence, and temperature along the trajectory varied between 243 and 247 K. (a) Observed (shaded bars) and simulated (lines) aerosol size distributions with best normalized mean error (NME) for each of the NPF and growth schemes investigated. (b) NME between the modeled and measured size distribution for the VEHK scheme with varying organics mixing ratios for condensational growth. The color of the circle indicates the value of NME corresponding to a particular initial mixing ratio of SO<sub>2</sub>, NH<sub>3</sub>, or organics that varied between 0 and 100 pptv. Blue represents the best agreement, red poorer agreement, and grey the worst (NME >1). There were 64 sensitivity tests. (c) As in (b), but for the NAPA scheme. (d) As in (c), but for the NAPAt scheme. (e) and (f) as in (c) and (d) respectively, but with NH<sub>3</sub> fixed and varying organics for condensational growth. (g) as in (b) but for the RIC scheme, which provides the lowest NME. There were 400 sensitivity tests for this scheme. (h) as in (b) but for the DUN scheme with NH<sub>3</sub> set to 0 (DUN<sub>NH3=0</sub>). (i) as in (c) but for the DUN scheme. (j) as in (i) but with varying organics for condensational growth. The table presents the NME results for the corresponding size distributions in panel (a) and associated initial mixing ratios of gas-phase precursors.**

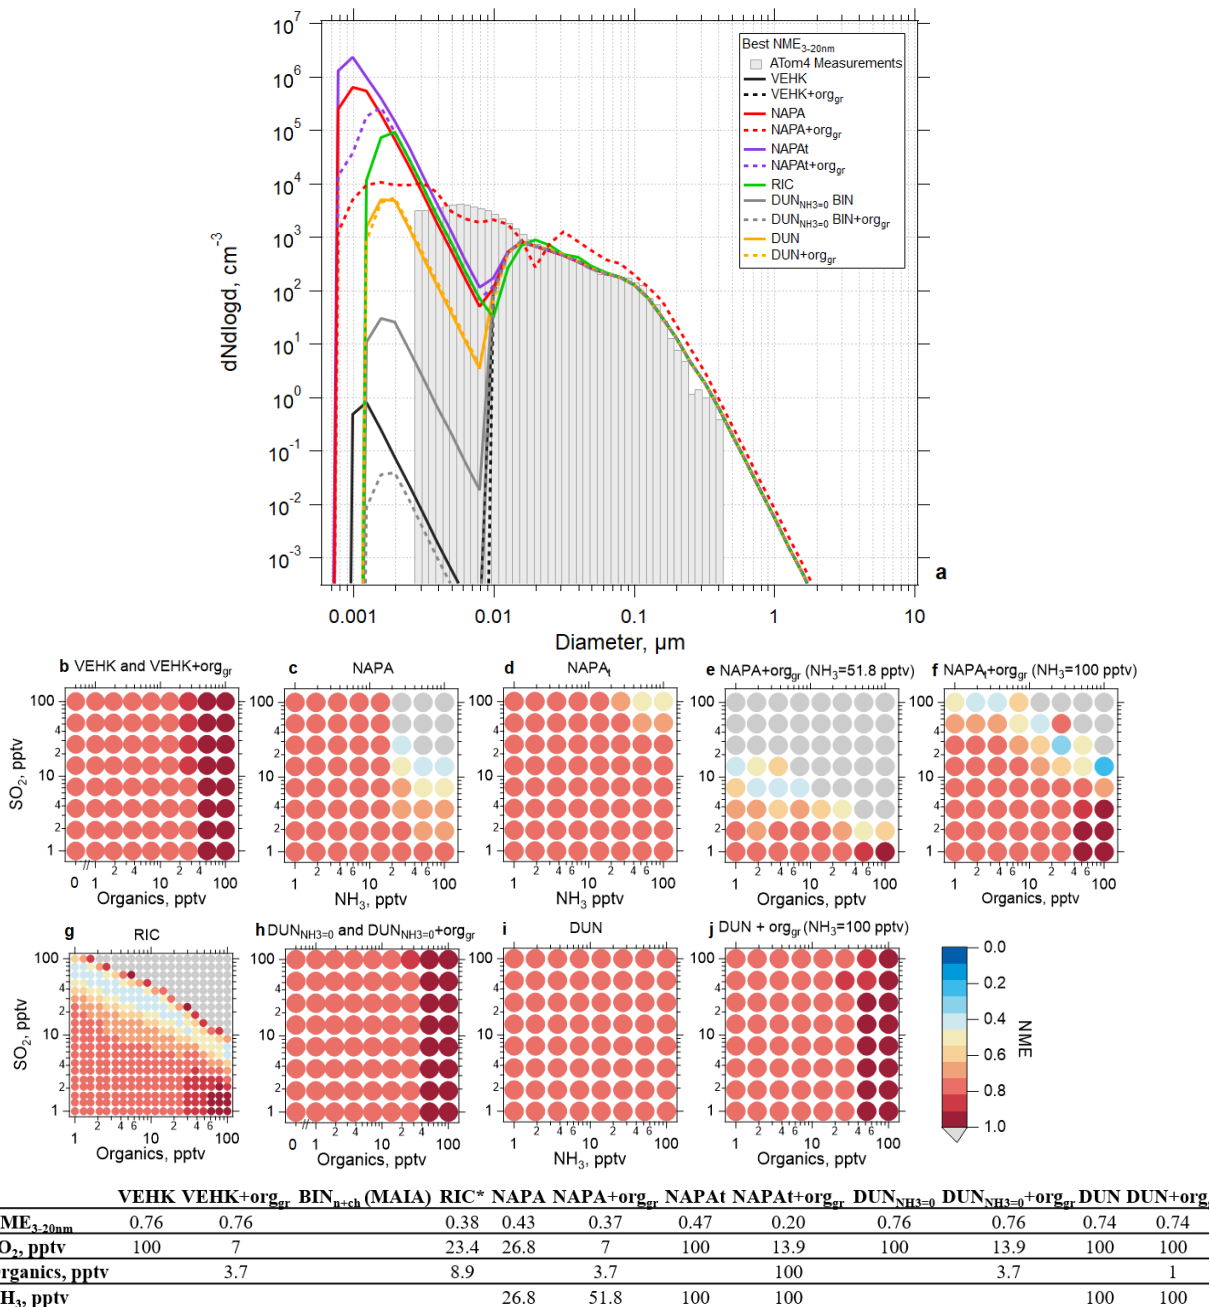

\*Temperature along the trajectory does not lie within the temperature range of the scheme

**Figure S38: Results of simulations using the TOMAS box model for case sd78 (ATom 4, 2018-05-01, 20:13:31-20:14:30 UTC) where measurements were made 13.76 hours following convective influence, and temperature along the trajectory varied between 244 and 250 K. (a) Observed (shaded bars) and simulated (lines) aerosol size distributions with best normalized mean error (NME) for each of the NPF and growth schemes investigated. (b) NME between the modeled and measured size distribution for the VEHK scheme with varying organics mixing ratios for condensational growth. The color of the circle indicates the value of NME corresponding to a particular initial mixing ratio of SO<sub>2</sub>, NH<sub>3</sub>, or organics that varied between 0 and 100 pptv. Blue represents the best agreement, red poorer agreement, and grey the worst (NME >1). There were 64 sensitivity tests. (c) As in (b), but for the NAPA scheme. (d) As in (c), but for the NAPAt scheme. (e) and (f) as in (c) and (d) respectively, but with NH<sub>3</sub> fixed and varying organics for condensation growth. (g) as in (b) but for the RIC scheme, which provides the lowest NME. There were 400 sensitivity tests for this scheme. (h) as in (b) but for the DUN scheme with NH<sub>3</sub> set to 0 (DUN<sub>NH3=0</sub>). (i) as in (c) but for the DUN scheme. (j) as in (i) but with varying organics for condensation growth. The table presents the NME results for the corresponding size distributions in panel (a) and associated initial mixing ratios of gas-phase precursors.**

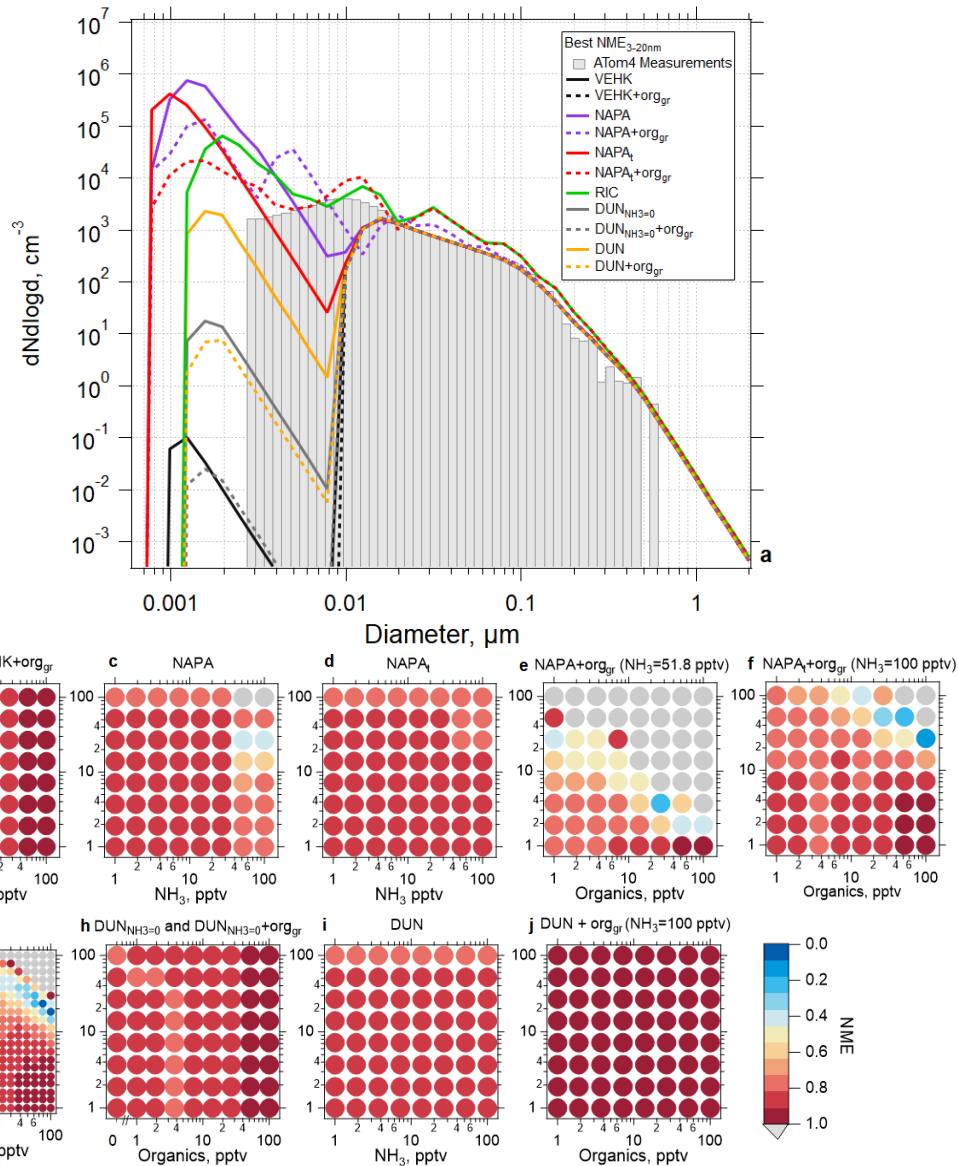

|                        | VEHK | VEHK+org <sub>gr</sub> | BIN <sub>n+ch</sub> (MAIA) | RIC* | NAPA | NAPA+org <sub>gr</sub> | NAPAt | NAPAt+org <sub>gr</sub> | DUN <sub>NH3=0</sub> | DUN <sub>NH3=0</sub> +org <sub>gr</sub> | DUN  | DUN+org <sub>gr</sub> |
|------------------------|------|------------------------|----------------------------|------|------|------------------------|-------|-------------------------|----------------------|-----------------------------------------|------|-----------------------|
| NME <sub>3-20nm</sub>  | 0.82 | 0.81                   |                            | 0.07 | 0.44 | 0.26                   | 0.76  | 0.16                    | 0.82                 | 0.81                                    | 0.81 | 0.92                  |
| SO <sub>2</sub> , pptv | 100  | 13.9                   |                            | 18.3 | 26.8 | 3.7                    | 100   | 26.8                    | 100                  | 13.9                                    | 100  | 13.9                  |
| Organics, pptv         |      | 3.7                    |                            | 100  |      | 26.8                   |       | 100                     |                      | 3.7                                     |      | 3.7                   |
| NH <sub>3</sub> , pptv |      |                        |                            |      | 51.8 | 51.8                   | 100   | 100                     |                      |                                         | 100  | 100                   |

\*Temperature along the trajectory does not lie within the temperature range of the scheme

**Figure S39: Results of simulations using the TOMAS box model for case sd82 (ATom 4, 2018-05-01, 20:17:31-20:18:30 UTC) where measurements were made 14.57 hours following convective influence, and temperature along the trajectory varied between 245 and 245 K. (a) Observed (shaded bars) and simulated (lines) aerosol size distributions with best normalized mean error (NME) for each of the NPF and growth schemes investigated. (b) NME between the modeled and measured size distribution for the VEHK scheme with varying organics mixing ratios for condensational growth. The color of the circle indicates the value of NME corresponding to a particular initial mixing ratio of SO<sub>2</sub>, NH<sub>3</sub>, or organics that varied between 0 and 100 pptv. Blue represents the best agreement, red poorer agreement, and grey the worst (NME >1). There were 64 sensitivity tests. (c) As in (b), but for the NAPA scheme. (d) As in (c), but for the NAPAt scheme. (e) and (f) as in (c) and (d) respectively, but with NH<sub>3</sub> fixed and varying organics for condensation growth. (g) as in (b) but for the RIC scheme, which provides the lowest NME. There were 400 sensitivity tests for this scheme. (h) as in (b) but for the DUN scheme with NH<sub>3</sub> set to 0 (DUN<sub>NH3=0</sub>). (i) as in (c) but for the DUN scheme. (j) as in (i) but with varying organics for condensation growth. The table presents the NME results for the corresponding size distributions in panel (a) and associated initial mixing ratios of gas-phase precursors.**



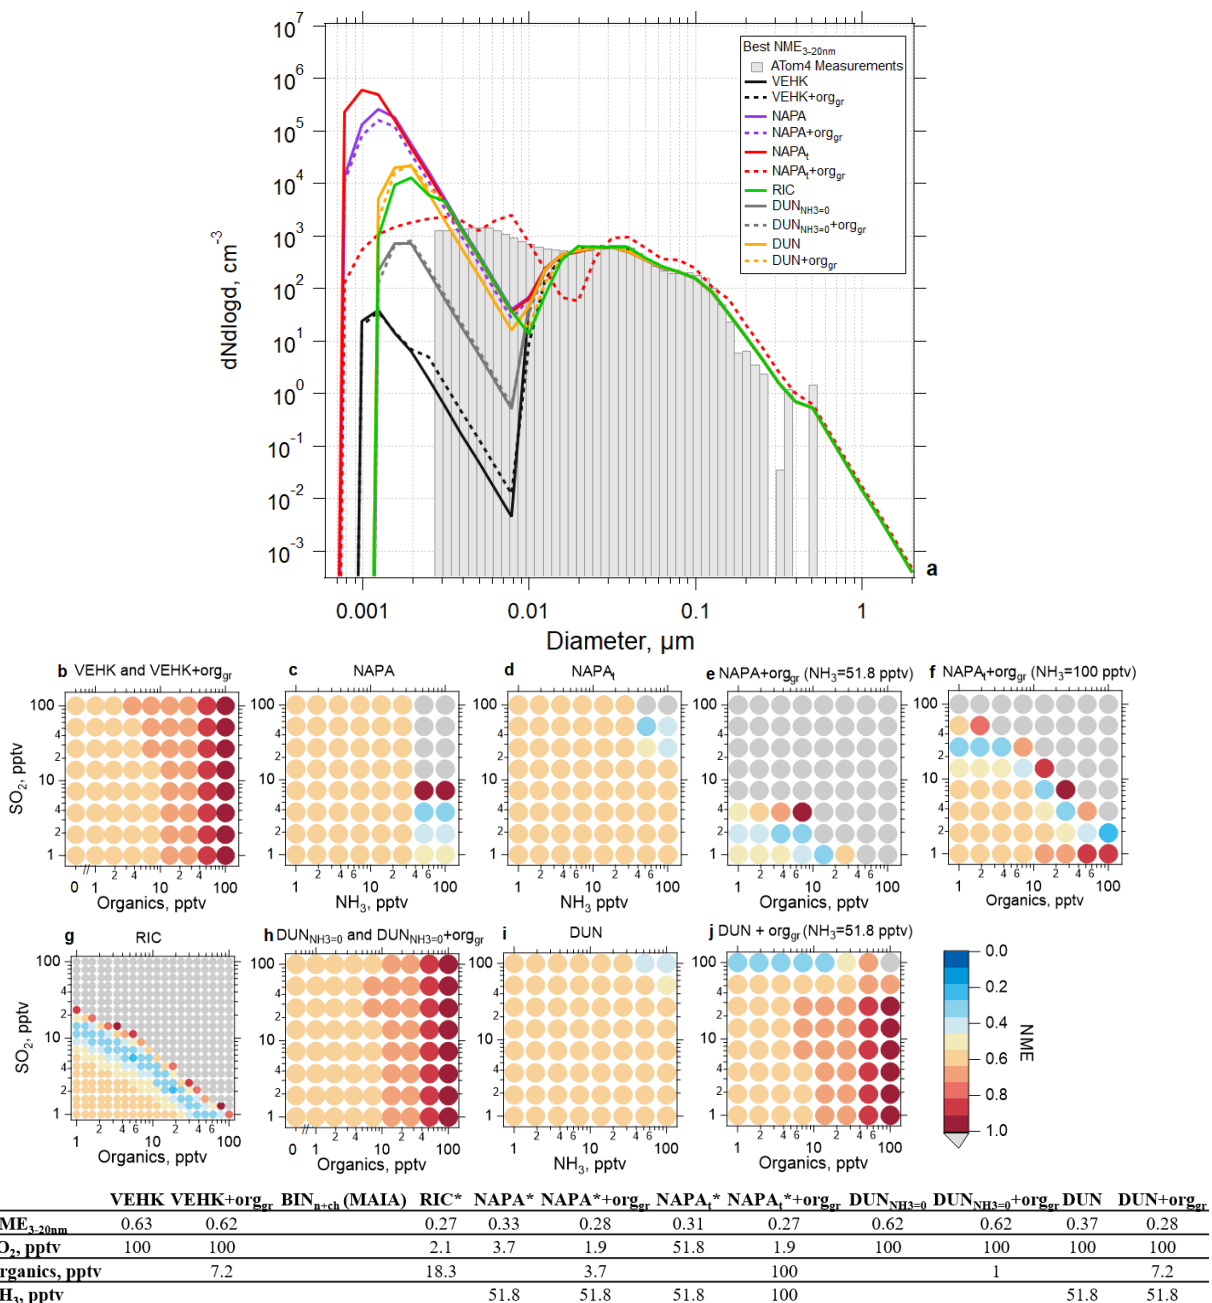

\*Temperature along the trajectory does not lie within the temperature range of the scheme

**Figure S40: Results of simulations using the TOMAS box model for case sd132 (ATom 4, 2018-05-01, 21:08:31-21:09:30 UTC) where measurements were made 12.99 hours following convective influence, and temperature along the trajectory varied between 235 and 248 K. (a) Observed (shaded bars) and simulated (lines) aerosol size distributions with best normalized mean error (NME) for each of the NPF and growth schemes investigated. (b) NME between the modeled and measured size distribution for the VEHK scheme with varying organics mixing ratios for condensational growth. The color of the circle indicates the value of NME corresponding to a particular initial mixing ratio of SO<sub>2</sub>, NH<sub>3</sub>, or organics that varied between 0 and 100 pptv. Blue represents the best agreement, red poorer agreement, and grey the worst (NME >1). There were 64 sensitivity tests. (c) As in (b), but for the NAPA scheme. (d) As in (c), but for the NAPAt scheme. (e) and (f) as in (c) and (d) respectively, but with NH<sub>3</sub> fixed and varying organics for condensation growth. (g) as in (b) but for the RIC scheme, which provides the lowest NME. There were 400 sensitivity tests for this scheme. (h) as in (b) but for the DUN scheme with NH<sub>3</sub> set to 0 (DUN<sub>NH3=0</sub>). (i) as in (c) but for the DUN scheme. (j) as in (i) but with varying organics for condensation growth. The table presents the NME results for the corresponding size distributions in panel (a) and associated initial mixing ratios of gas-phase precursors.**



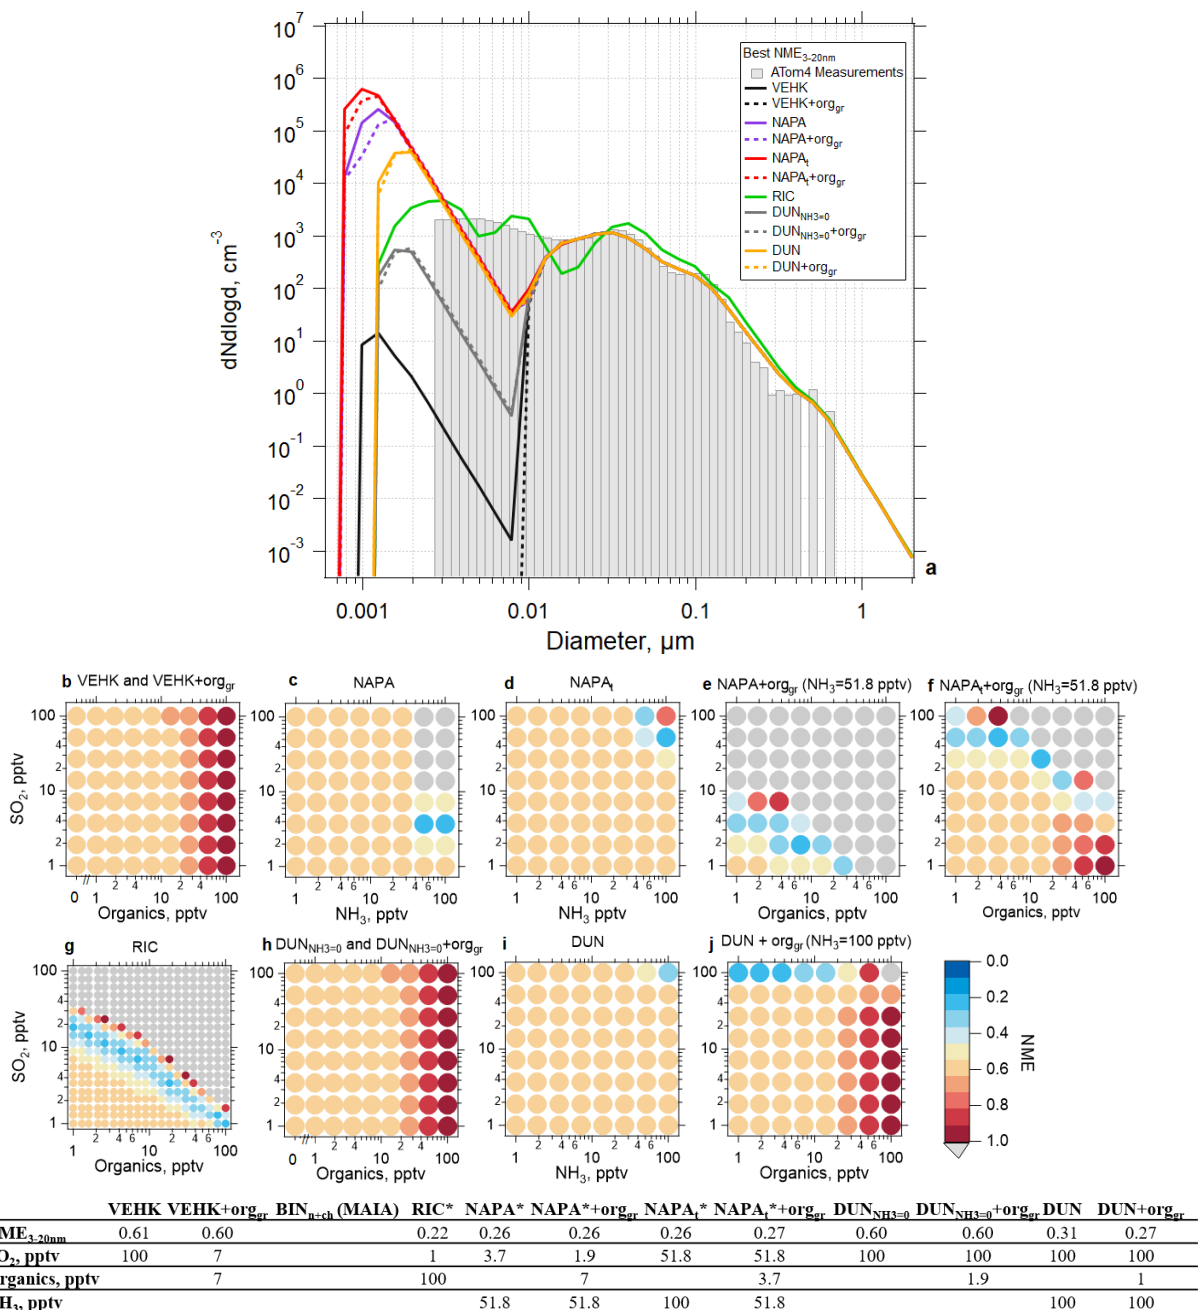

**Figure S41: Results of simulations using the TOMAS box model for case sd134 (ATom 4, 2018-05-01, 21:09:31-21:10:30 UTC) where measurements were made 13.55 hours following convective influence, and temperature along the trajectory varied between 235 and 248 K. (a) Observed (shaded bars) and simulated (lines) aerosol size distributions with best normalized mean error (*NME*) for each of the NPF and growth schemes investigated. (b) *NME* between the modeled and measured size distribution for the VEHK scheme with varying organics mixing ratios for condensational growth. The color of the circle indicates the value of *NME* corresponding to a particular initial mixing ratio of SO<sub>2</sub>, NH<sub>3</sub>, or organics that varied between 0 and 100 pptv. Blue represents the best agreement, red poorer agreement, and grey the worst (*NME* >1). There were 64 sensitivity tests. (c) As in (b), but for the NAPA scheme. (d) As in (c), but for the NAPAt scheme. (e) and (f) as in (c) and (d) respectively, but with NH<sub>3</sub> fixed and varying organics for condensation growth. (g) as in (b) but for the RIC scheme, which provides the lowest *NME*. There were 400 sensitivity tests for this scheme. (h) as in (b) but for the DUN scheme with NH<sub>3</sub> set to 0 (DUN<sub>NH3=0</sub>). (i) as in (c) but for the DUN scheme. (j) as in (i) but with varying organics for condensation growth. The table presents the *NME* results for the corresponding size distributions in panel (a) and associated initial mixing ratios of gas-phase precursors.**

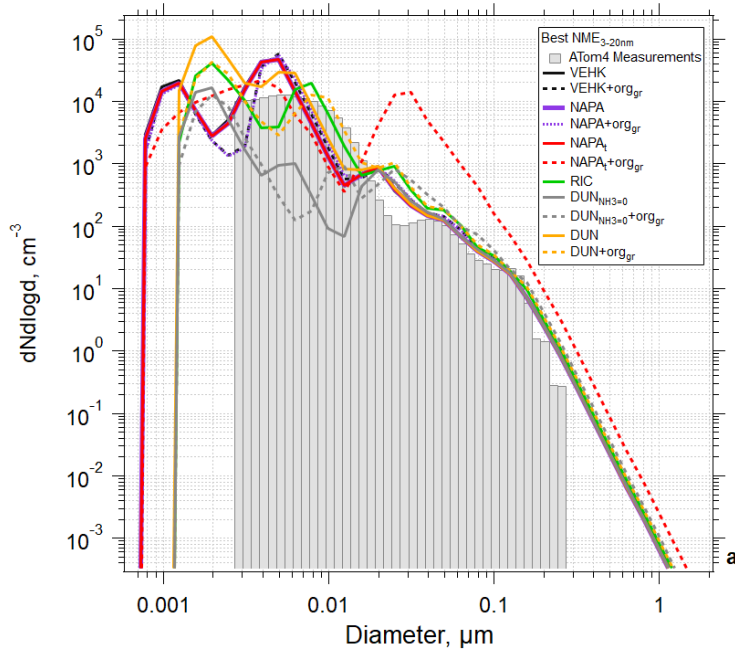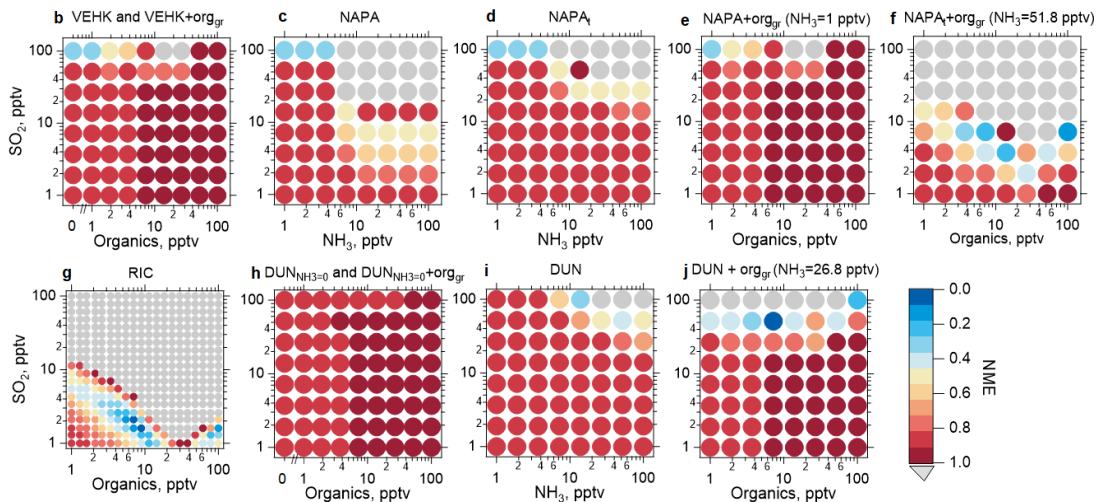

|                        | VEHK | VEHK+org <sub>gr</sub> | BIN <sub>n=ch</sub> (MAIA) | RIC* | NAPA* | NAPA*+org <sub>gr</sub> | NAPA <sub>t</sub> * | NAPA <sub>t</sub> *+org <sub>gr</sub> | DUN <sub>NH3=0</sub> | DUN <sub>NH3=0</sub> +org <sub>gr</sub> | DUN  | DUN+org <sub>gr</sub> |      |
|------------------------|------|------------------------|----------------------------|------|-------|-------------------------|---------------------|---------------------------------------|----------------------|-----------------------------------------|------|-----------------------|------|
| NME <sub>3-20nm</sub>  | 0.32 | 0.36                   |                            | 0.02 | 0.32  | 0.36                    | 0.32                | 0.10                                  | 0.86                 | 0.85                                    | 0.33 | 0.09                  |      |
| SO <sub>2</sub> , pptv | 100  | 100                    |                            | 1.6  | 100   | 100                     | 100                 | 7.2                                   | 100                  | 100                                     | 100  | 51.8                  |      |
| Organics, pptv         |      | 1                      |                            | 8.9  |       | 1                       |                     | 100                                   |                      | 7.2                                     |      | 7.2                   |      |
| NH <sub>3</sub> , pptv |      |                        |                            |      | 1.9   |                         | 1                   | 1.9                                   |                      |                                         |      | 13.9                  | 26.8 |

\*Temperature along the trajectory does not lie within the temperature range of the scheme

**Figure S42: Results of simulations using the TOMAS box model for case sd179 (ATom 4, 2018-05-01, 21:54:31-21:55:30 UTC) where measurements were made 17.23 hours following convective influence, and temperature along the trajectory varied between 234 and 245 K. (a) Observed (shaded bars) and simulated (lines) aerosol size distributions with best normalized mean error (*NME*) for each of the NPF and growth schemes investigated. (b) *NME* between the modeled and measured size distribution for the VEHK scheme with varying organics mixing ratios for condensational growth. The color of the circle indicates the value of *NME* corresponding to a particular initial mixing ratio of SO<sub>2</sub>, NH<sub>3</sub>, or organics that varied between 0 and 100 pptv. Blue represents the best agreement, red poorer agreement, and grey the worst (*NME* >1). There were 64 sensitivity tests. (c) As in (b), but for the NAPA scheme. (d) As in (c), but for the NAPA<sub>t</sub> scheme. (e) and (f) as in (c) and (d) respectively, but with NH<sub>3</sub> fixed and varying organics for condensation growth. (g) as in (b) but for the RIC scheme, which provides the lowest *NME*. There were 400 sensitivity tests for this scheme. (h) as in (b) but for the DUN scheme with NH<sub>3</sub> set to 0 (DUN<sub>NH3=0</sub>). (i) as in (c) but for the DUN scheme. (j) as in (i) but with varying organics for condensation growth. The table presents the *NME* results for the corresponding size distributions in panel (a) and associated initial mixing ratios of gas-phase precursors.**

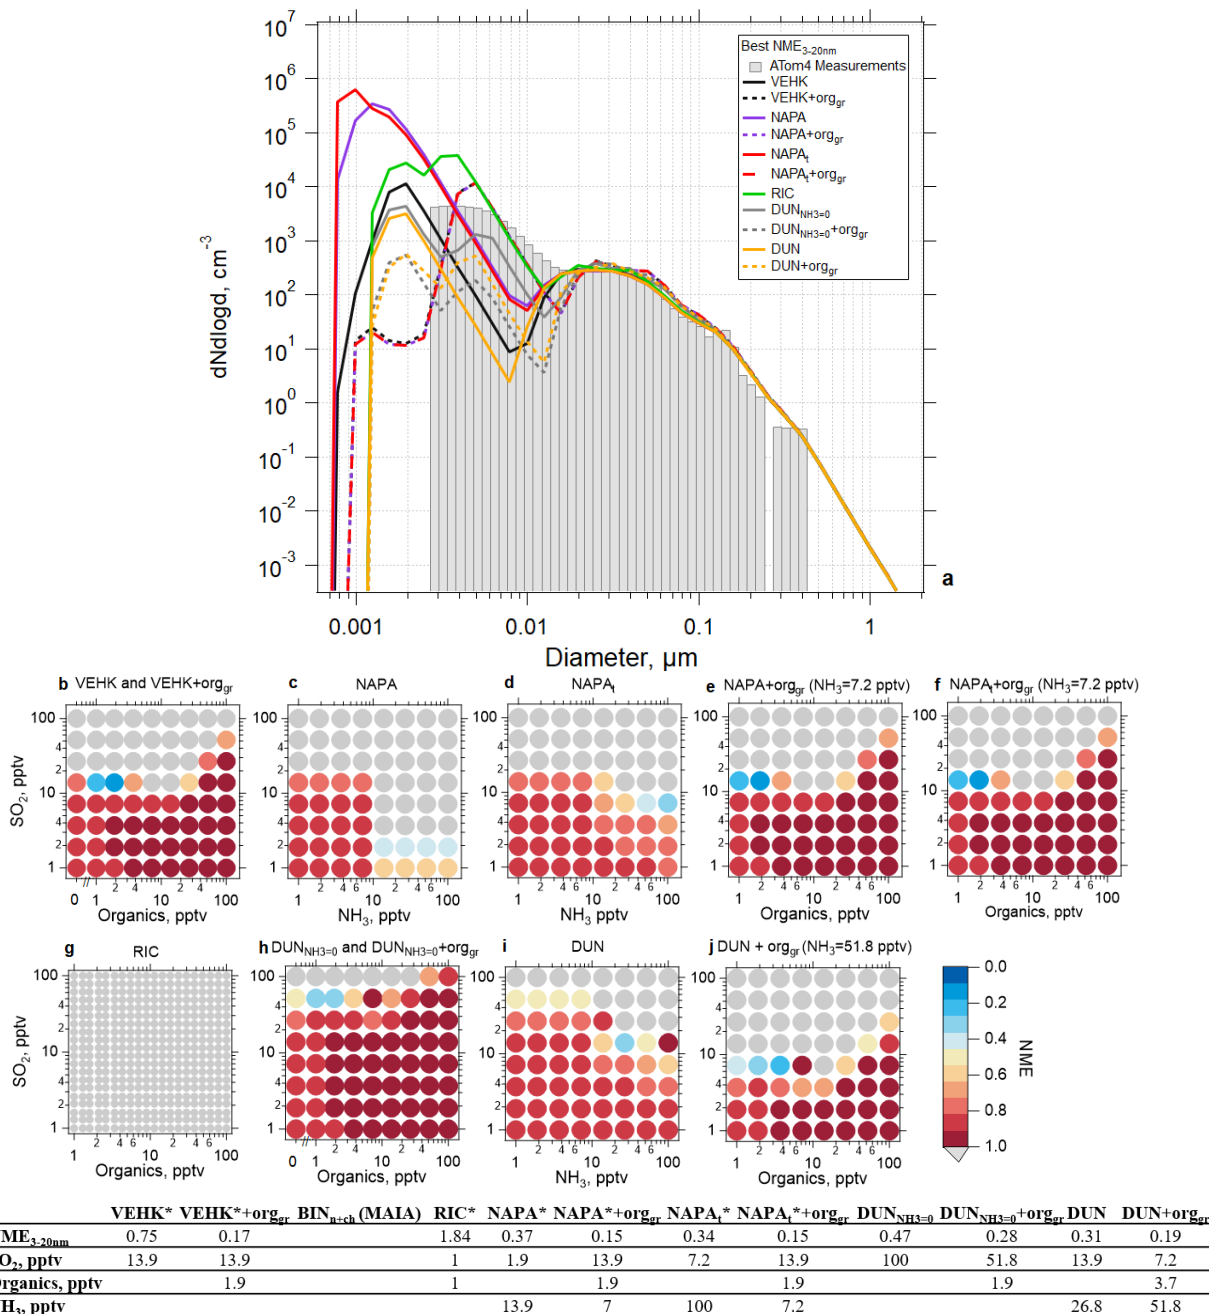

**Figure S43: Results of simulations using the TOMAS box model for case sd183 (ATom 4, 2018-05-01, 21:58:31-21:59:30 UTC) where measurements were made 19.39 hours following convective influence, and temperature along the trajectory varied between 226 and 239 K. (a) Observed (shaded bars) and simulated (lines) aerosol size distributions with best normalized mean error (NME) for each of the NPF and growth schemes investigated. (b) NME between the modeled and measured size distribution for the VEHK scheme with varying organics mixing ratios for condensational growth. The color of the circle indicates the value of NME corresponding to a particular initial mixing ratio of SO<sub>2</sub>, NH<sub>3</sub>, or organics that varied between 0 and 100 pptv. Blue represents the best agreement, red poorer agreement, and grey the worst (NME >1). There were 64 sensitivity tests. (c) As in (b), but for the NAPA scheme. (d) As in (c), but for the NAPAT scheme. (e) and (f) as in (c) and (d) respectively, but with NH<sub>3</sub> fixed and varying organics for condensational growth. (g) as in (b) but for the RIC scheme, which provides the lowest NME. There were 400 sensitivity tests for this scheme. (h) as in (b) but for the DUN scheme with NH<sub>3</sub> set to 0 (DUN<sub>NH3=0</sub>). (i) as in (c) but for the DUN scheme. (j) as in (i) but with varying organics for condensational growth. The table presents the NME results for the corresponding size distributions in panel (a) and associated initial mixing ratios of gas-phase precursors.**

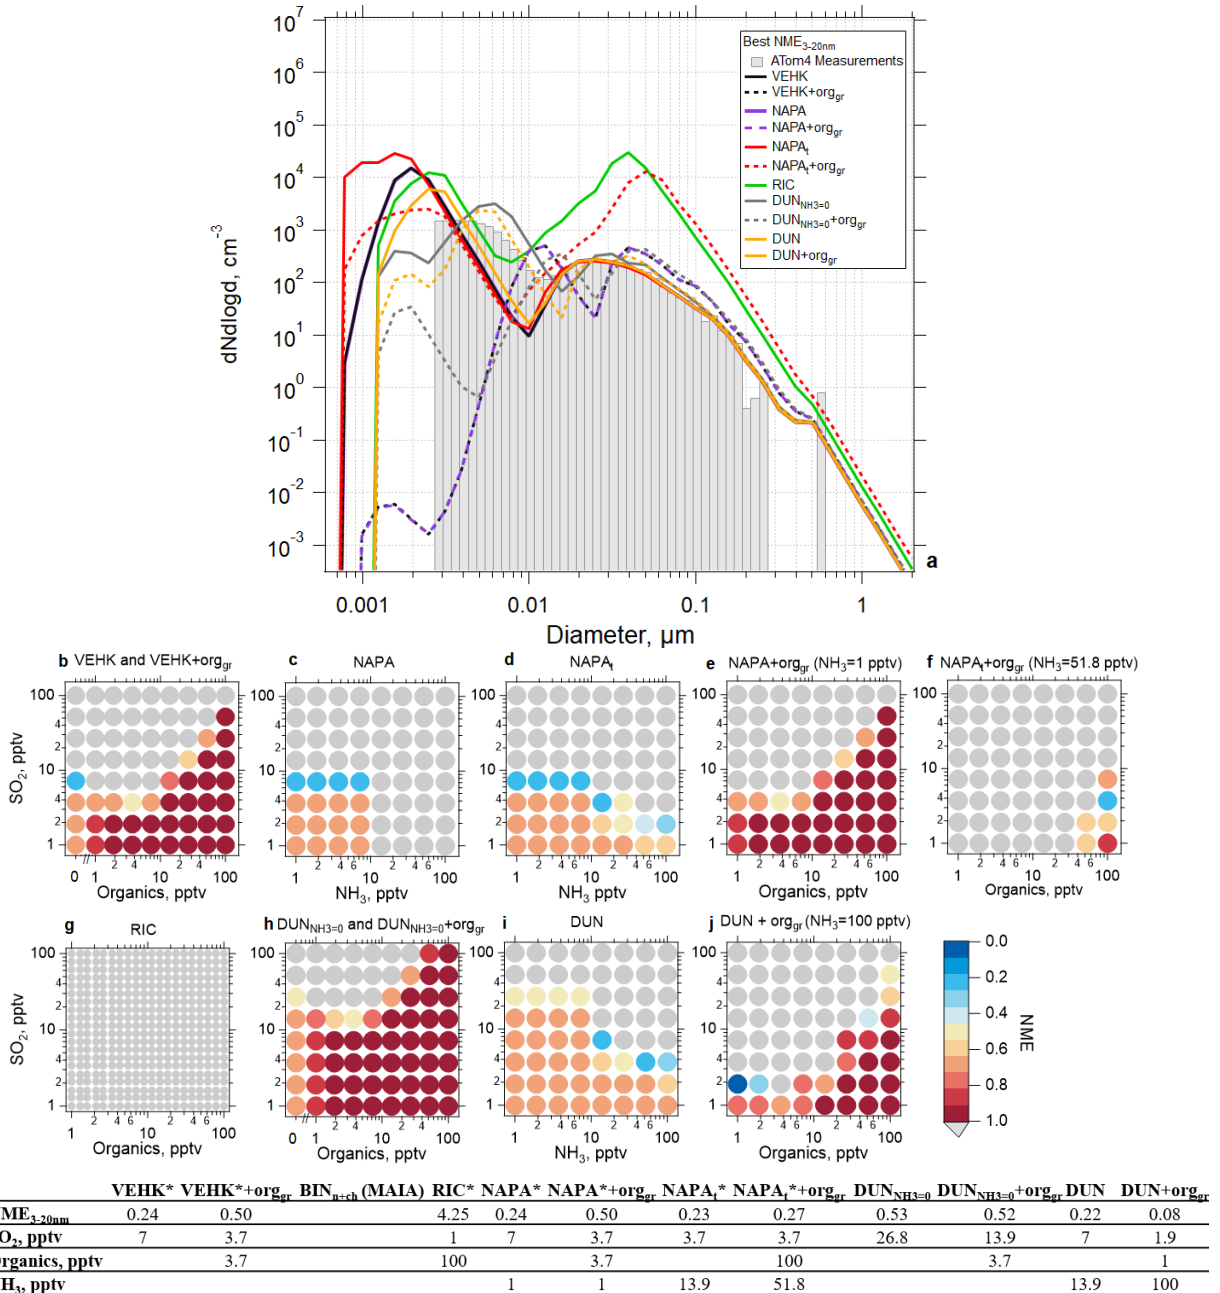

**Figure S44: Results of simulations using the TOMAS box model for case sd186 (ATom 4, 2018-05-01, 22:01:31-22:02:30 UTC) where measurements were made 22.36 hours following convective influence, and temperature along the trajectory varied between 226 and 244 K. (a) Observed (shaded bars) and simulated (lines) aerosol size distributions with best normalized mean error (NME) for each of the NPF and growth schemes investigated. (b) NME between the modeled and measured size distribution for the VEHK scheme with varying organics mixing ratios for condensational growth. The color of the circle indicates the value of NME corresponding to a particular initial mixing ratio of SO<sub>2</sub>, NH<sub>3</sub>, or organics that varied between 0 and 100 pptv. Blue represents the best agreement, red poorer agreement, and grey the worst (NME >1). There were 64 sensitivity tests. (c) As in (b), but for the NAPA scheme. (d) As in (c), but for the NAPA<sub>t</sub> scheme. (e) and (f) as in (c) and (d) respectively, but with NH<sub>3</sub> fixed and varying organics for condensational growth. (g) as in (b) but for the RIC scheme, which provides the lowest NME. There were 400 sensitivity tests for this scheme. (h) as in (b) but for the DUN scheme with NH<sub>3</sub> set to 0 (DUN<sub>NH<sub>3</sub>=0</sub>). (i) as in (c) but for the DUN scheme. (j) as in (i) but with varying organics for condensational growth. The table presents the NME results for the corresponding size distributions in panel (a) and associated initial mixing ratios of gas-phase precursors.**



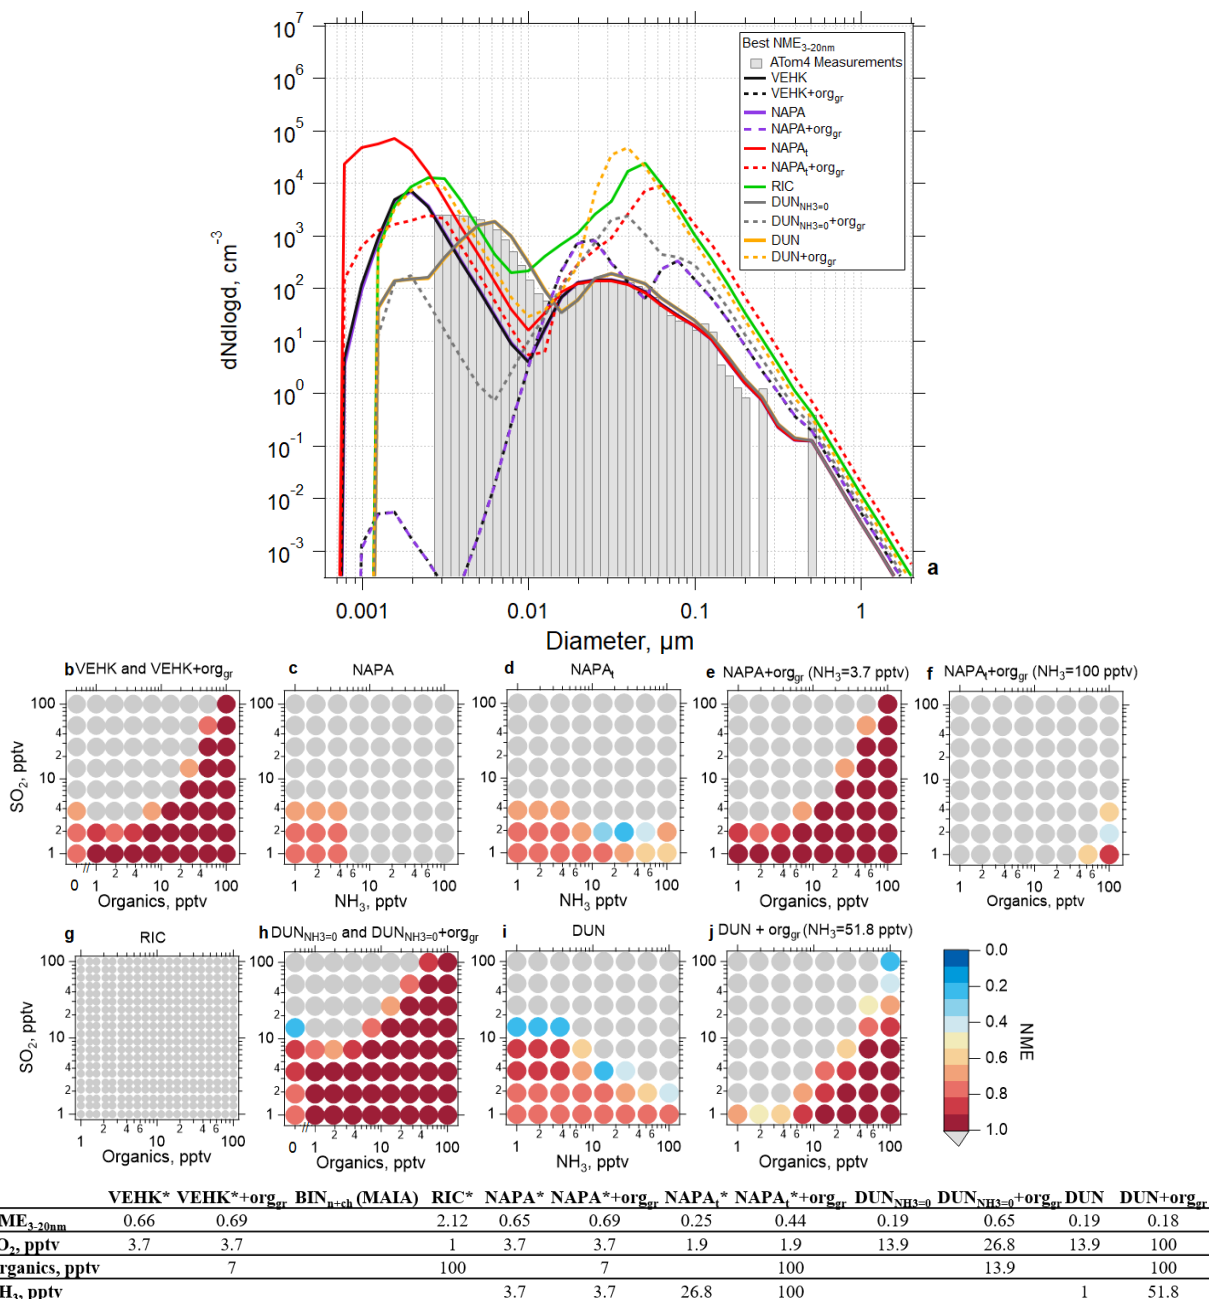

Figure S45: Results of simulations using the TOMAS box model for case sd188 (ATom 4, 2018-05-01, 22:03:31-22:04:30 UTC) where measurements were made 23.27 hours following convective influence, and temperature along the trajectory varied between 227 and 248 K. (a) Observed (shaded bars) and simulated (lines) aerosol size distributions with best normalized mean error (*NME*) for each of the NPF and growth schemes investigated. (b) *NME* between the modeled and measured size distribution for the VEHK scheme with varying organics mixing ratios for condensational growth. The color of the circle indicates the value of *NME* corresponding to a particular initial mixing ratio of SO<sub>2</sub>, NH<sub>3</sub>, or organics that varied between 0 and 100 pptv. Blue represents the best agreement, red poorer agreement, and grey the worst (*NME* > 1). There were 64 sensitivity tests. (c) As in (b), but for the NAPA scheme. (d) As in (c), but for the NAPA<sub>t</sub> scheme. (e) and (f) as in (c) and (d) respectively, but with NH<sub>3</sub> fixed and varying organics for condensation growth. (g) as in (b) but for the RIC scheme, which provides the lowest *NME*. There were 400 sensitivity tests for this scheme. (h) as in (b) but for the DUN scheme with NH<sub>3</sub> set to 0 (DUN<sub>NH3=0</sub>). (i) as in (c) but for the DUN scheme. (j) as in (i) but with varying organics for condensation growth. The table presents the *NME* results for the corresponding size distributions in panel (a) and associated initial mixing ratios of gas-phase precursors.



S3. The impact of OH,  $F_{orgnuc}$  in RIC, and initial SD on case study sd486

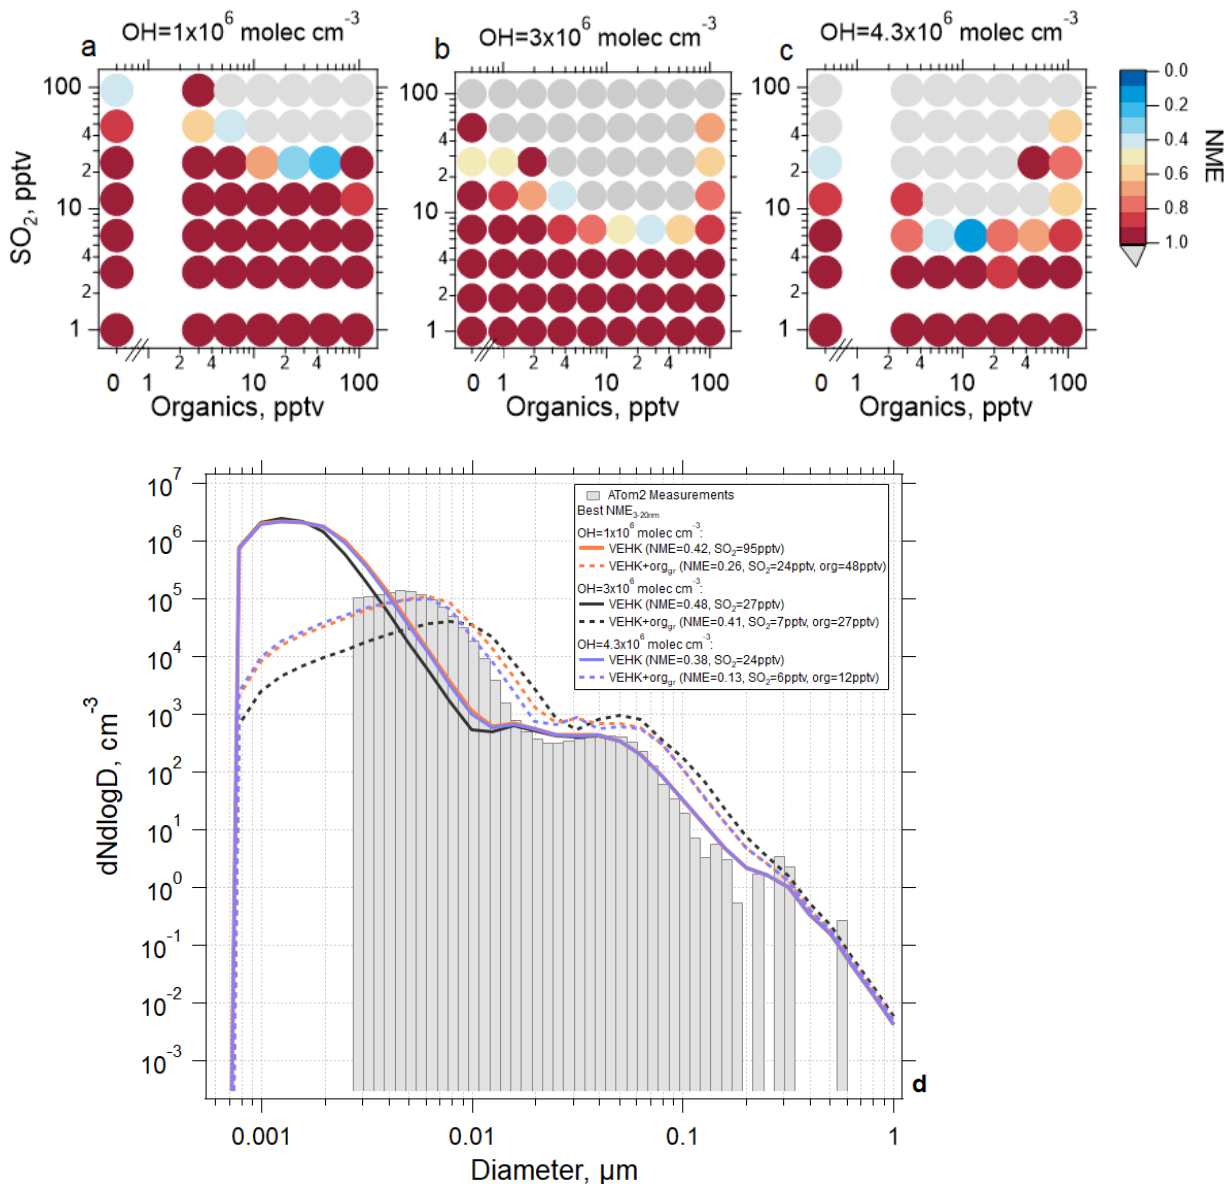

| OH, molec cm <sup>-3</sup> | VEHK     |                        | VEHK+org <sub>gr</sub> |                 |                |
|----------------------------|----------|------------------------|------------------------|-----------------|----------------|
|                            | Best NME | SO <sub>2</sub> , pptv | Best NME               | SO <sub>2</sub> | Organics, pptv |
| 1x10 <sup>6</sup>          | 0.42     | 95                     | 0.26                   | 24              | 48             |
| 3x10 <sup>6</sup>          | 0.48     | 26.8                   | 0.41                   | 7.2             | 26.8           |
| 4.3x10 <sup>6</sup>        | 0.38     | 24                     | 0.13                   | 6               | 12             |

Figure S46: Results of simulations using the TOMAS box model and VEHK nucleation scheme with and without organics added for initial particle growth for case sd486 (ATom2, 2017-02-03, 03:05:31-03:06:30 UTC). OH at solar zenith angle of 0° was varied between 1 and 4.3x10<sup>6</sup> molec cm<sup>-3</sup> (a-c). d) Size distribution for the corresponding best NME of each OH setting as in (a-c). Best NME results are summarized in the table. For OH settings of 1 and 4.3x10<sup>6</sup> molec cm<sup>-3</sup> simulations were undertaken at slightly different resolution (no mixing ratios of organics equal to 1 pptv was studied).

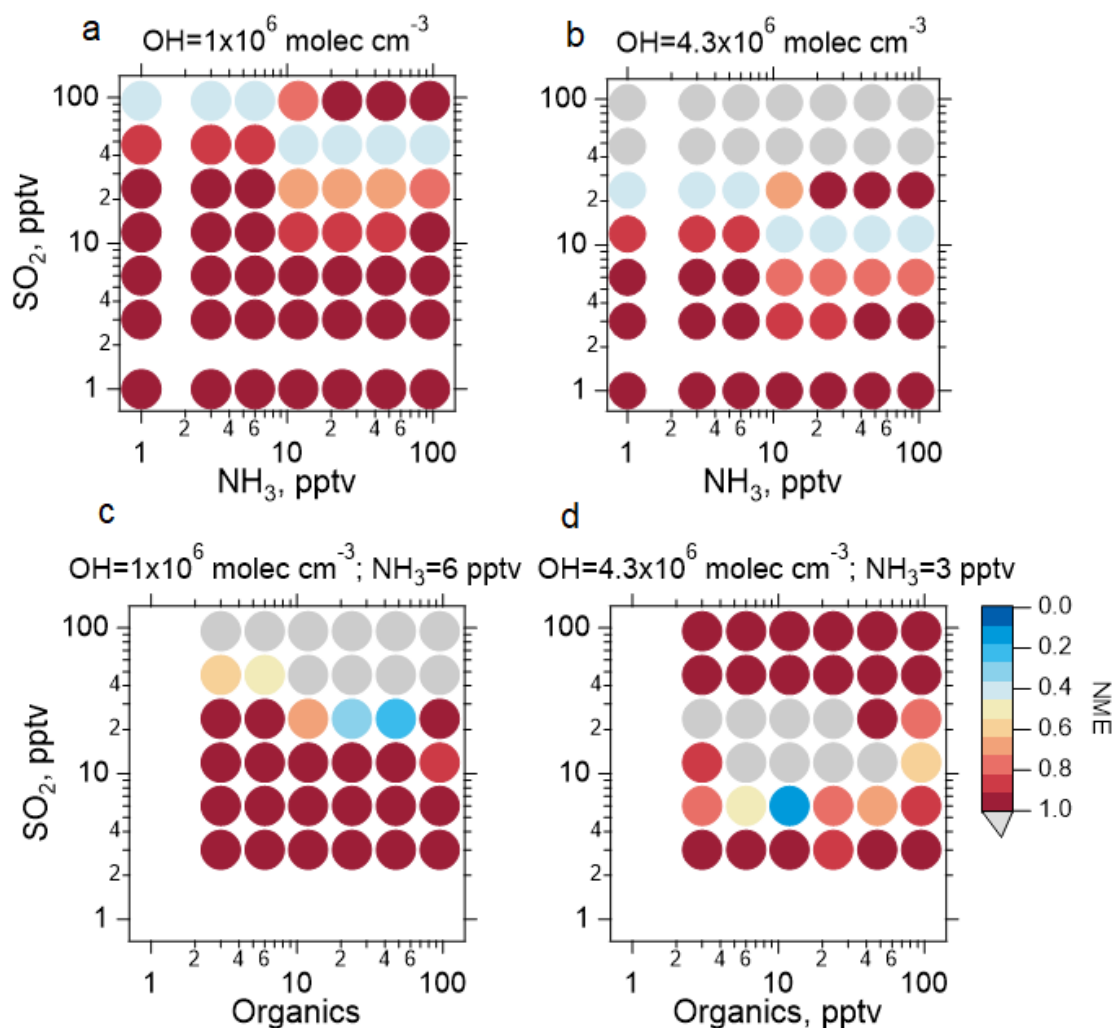

| OH,<br>molec cm <sup>-3</sup> | NAPA     |                        |                        | NAPA+org <sub>gr</sub> |                 |                        |                |
|-------------------------------|----------|------------------------|------------------------|------------------------|-----------------|------------------------|----------------|
|                               | Best NME | SO <sub>2</sub> , pptv | NH <sub>3</sub> , pptv | Best NME               | SO <sub>2</sub> | NH <sub>3</sub> , pptv | Organics, pptv |
| 1x10 <sup>6</sup>             | 0.38     | 47.5                   | 23.8                   | 0.25                   | 23.8            | 6                      | 47.5           |
| 3x10 <sup>6</sup>             | 0.42     | 13.9                   | 13.9                   | 0.37                   | 7.2             | 100                    | 1              |
| 4.3x10 <sup>6</sup>           | 0.39     | 23.8                   | 1                      | 0.14                   | 6               | 3                      | 11.9           |

Fig. S47: Results of simulations using the TOMAS box model and NAPA nucleation scheme with and without organics added for initial particle growth for case sd486 (ATom2, 2017-02-03, 03:05:31-03:06:30 UTC). OH at solar zenith angle of 0° was set to 1 (a,c) and 4.3x10<sup>6</sup> molec cm<sup>-3</sup> (b,d). Results for OH=3x10<sup>6</sup> molec cm<sup>-3</sup> are presented in Fig. 6 in the manuscript. Best NME results are summarized in the table. OH setting of 1 and 4x10<sup>6</sup> molec cm<sup>-3</sup> was simulated at lower resolution than in Figure 6. No simulations were done for SO<sub>2</sub> and organics mixing ratios below 3 pptv in c) and d).

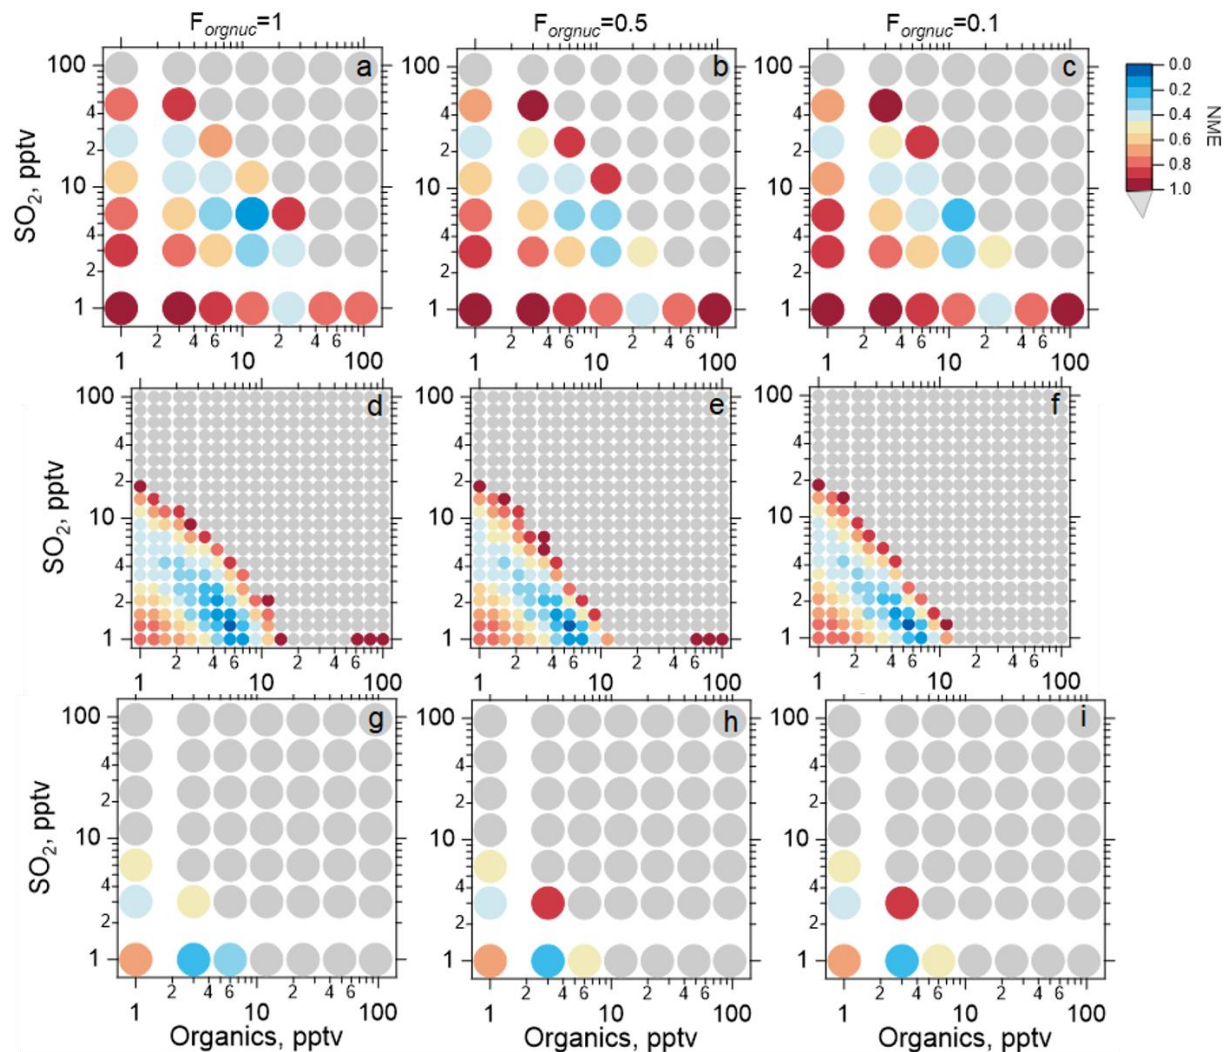

| OH ,<br>molec cm <sup>-3</sup> | $F_{organuc}$ | RIC      |                        |                |
|--------------------------------|---------------|----------|------------------------|----------------|
|                                |               | Best NME | SO <sub>2</sub> , pptv | Organics, pptv |
| 1x10 <sup>6</sup>              | 1             | 0.17     | 6                      | 12             |
|                                | 0.5           | 0.28     | 6                      | 12             |
|                                | 0.1           | 0.26     | 6                      | 12             |
| 3x10 <sup>6</sup>              | 1             | 0.021    | 1.3                    | 5.5            |
|                                | 0.5           | 0.015    | 1.3                    | 5.5            |
|                                | 0.1           | 0.13     | 1.3                    | 5.5            |
| 4.3x10 <sup>6</sup>            | 1             | 0.191    | 1                      | 3              |
|                                | 0.5           | 0.193    | 1                      | 3              |
|                                | 0.1           | 0.198    | 1                      | 3              |

Figure S48: Example of the impact of the scaling factor ( $F_{organuc}$ ) of organics and OH setting in RIC scheme and case study sd486 (ATom2 measurements, 2017-02-03, 03:05:31-03:06:30 UTC). OH at solar zenith angle of  $0^\circ$  was set to 1 (a-c), 3 (d-f) and  $4.3 \times 10^6$  (g-i) molec cm<sup>-3</sup>, time since convective influence 7.3 hrs and best normalized mean error (NME) between the modeled and measured size distribution: (a,d,g) at  $F_{organuc}=1$ , (b,e,h) at  $F_{organuc}=0.5$ , (c,f,i) at  $F_{organuc}=0.1$ .  $F_{organuc}$  represents the fraction of the condensable organic, labeled *BioOxOrg*, that may participate in nucleation by stabilizing the cluster. The color of the circles indicates the value of NME; grey circles indicate NME >1. Varying  $F_{organuc}$  does not change results significantly.

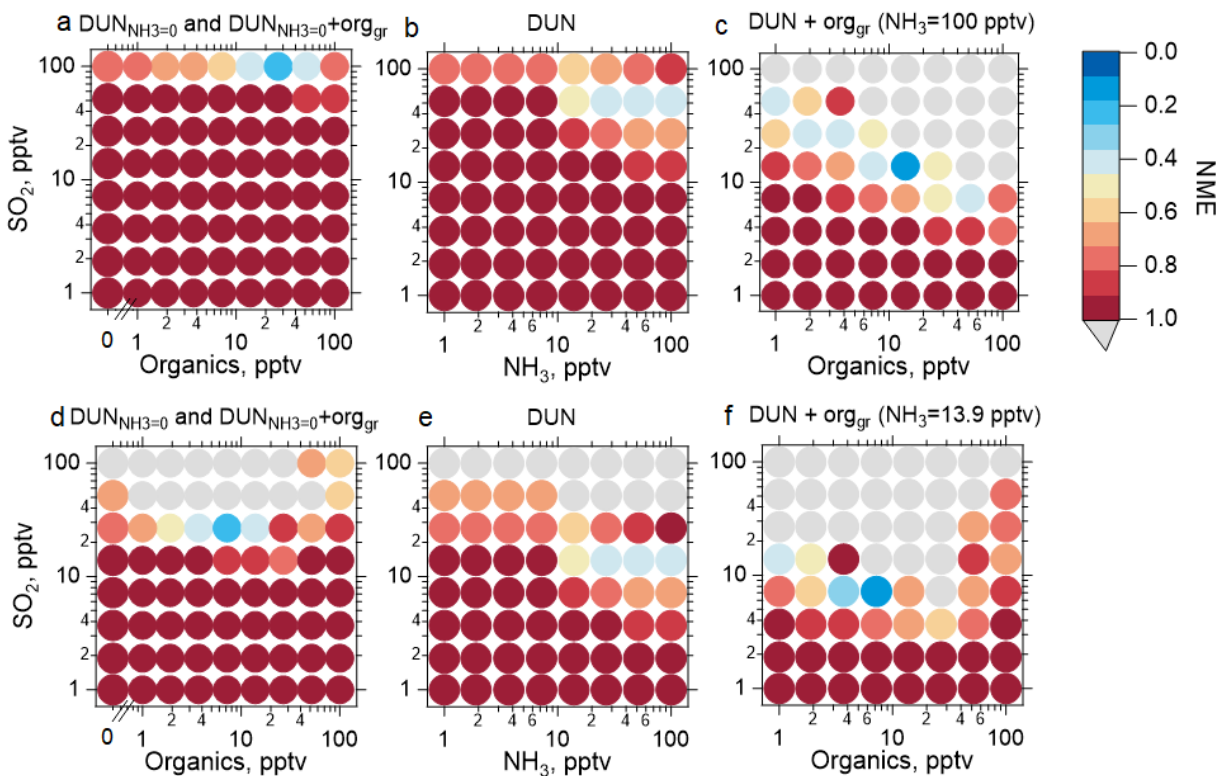

| OH,<br>molec cm <sup>-3</sup> | DUN <sub>NH<sub>3</sub>=0</sub> |                        |                        | DUN <sub>NH<sub>3</sub>=0</sub> +org <sub>gr</sub> |                        |                        |                |
|-------------------------------|---------------------------------|------------------------|------------------------|----------------------------------------------------|------------------------|------------------------|----------------|
|                               | Best NME                        | SO <sub>2</sub> , pptv | NH <sub>3</sub> , pptv | Best NME                                           | SO <sub>2</sub> , pptv | NH <sub>3</sub> , pptv | Organics, pptv |
| 1x10 <sup>6</sup>             | 0.78                            | 100                    | 0                      | 0.27                                               | 100                    | 0                      | 26.8           |
| 3x10 <sup>6</sup>             | 0.37                            | 51.8                   | 0                      | 0.3                                                | 51.8                   | 0                      | 1              |
| 4.3x10 <sup>6</sup>           | 0.72                            | 51.8                   | 0                      | 0.21                                               | 26.8                   | 0                      | 7.2            |
| OH,<br>molec cm <sup>-3</sup> | DUN                             |                        |                        | DUN+org <sub>gr</sub>                              |                        |                        |                |
|                               | Best NME                        | SO <sub>2</sub> , pptv | NH <sub>3</sub> , pptv | Best NME                                           | SO <sub>2</sub> , pptv | NH <sub>3</sub> , pptv | Organics, pptv |
| 1x10 <sup>6</sup>             | 0.38                            | 100                    | 51.8                   | 0.13                                               | 13.9                   | 100                    | 13.9           |
| 3x10 <sup>6</sup>             | 0.34                            | 51.8                   | 7                      | 0.04                                               | 7.2                    | 26.8                   | 7.2            |
| 4.3x10 <sup>6</sup>           | 0.37                            | 13.9                   | 100                    | 0.12                                               | 7.2                    | 13.9                   | 7.2            |

Figure S49: Results of simulations using the TOMAS box model and DUN nucleation scheme, with and without NH<sub>3</sub>, and with and without organics added for initial particle growth for case sd486 (ATom2, 2017-02-03, 03:05:31-03:06:30 UTC) where OH has been set to 1 (a,b,c) and 4.3x10<sup>6</sup> molec cm<sup>-3</sup> (d,e,f). (a,c) DUN scheme with NH<sub>3</sub> set to 0 and with organics added for initial particle growth; (b,e) DUN nucleation scheme and (c,f) DUN with organics added for initial particle growth. Results for OH=3x10<sup>6</sup> molec cm<sup>-3</sup> are presented in Fig. 6 in the manuscript. Best NME results are summarized in the table. OH setting of 1 and 4x10<sup>6</sup> molec cm<sup>-3</sup> was simulated at lower resolution than in Figure 6.

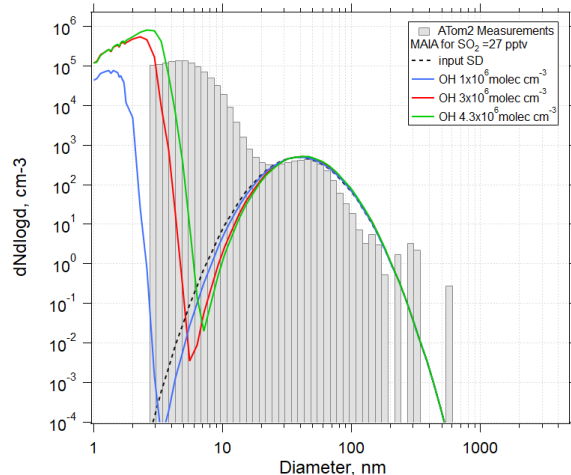

Figure S50: Example of the measured size distribution (2017-02-03, 03:05:31-03:06:30 UTC, sd486) and the simulated case for three different OH at solar zenith angle of  $0^\circ$  was set between  $1 \times 10^6$  and  $4.3 \times 10^6$  molecules  $\text{cm}^{-3}$ . MAIA simulations undertaken using binary neutral and charged (sum of both) nucleation scheme for a range of noon OH concentrations and  $\text{SO}_2$  of 27 pptv.

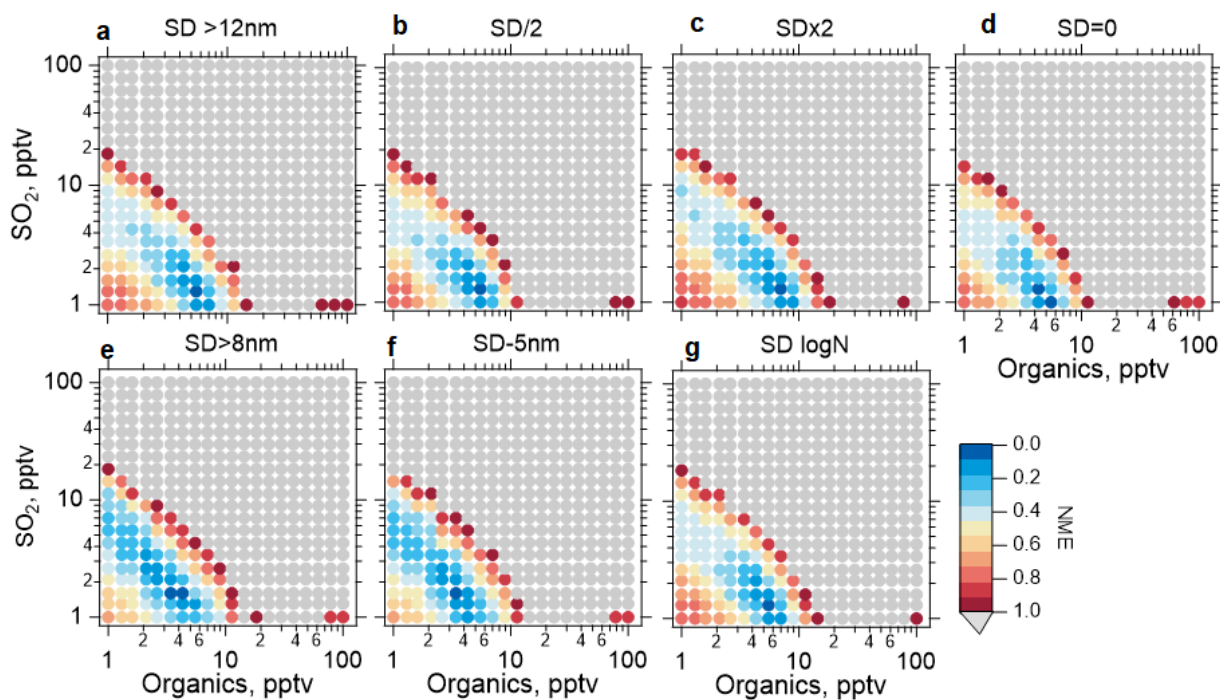

| Size distribution as dndlogd | RIC      |                      |                |
|------------------------------|----------|----------------------|----------------|
|                              | Best NME | $\text{SO}_2$ , pptv | Organics, pptv |
| SD measured (>12 nm)         | 0.02     | 1.3                  | 5.5            |
| SD=0                         | 0.04     | 1.3                  | 4.3            |
| SDx2                         | 0.04     | 1.3                  | 7.2            |
| SD/2                         | 0.06     | 1.3                  | 5.5            |
| SD - 5 nm                    | 0.08     | 1.6                  | 3.4            |
| SD > 8 nm                    | 0.09     | 1.6                  | 4.3            |
| SD logN                      | 0.03     | 1.3                  | 5.5            |

Figure S51: The effect of the initial background aerosol on the NME in TOMAS for case sd486 (ATom2, 2017-02-03, 03:05:31-03:06:30 UTC) and RIC nucleation scheme. OH at solar zenith angle of  $0^\circ$  was set to  $3 \times 10^6$  molec  $\text{cm}^{-3}$ .



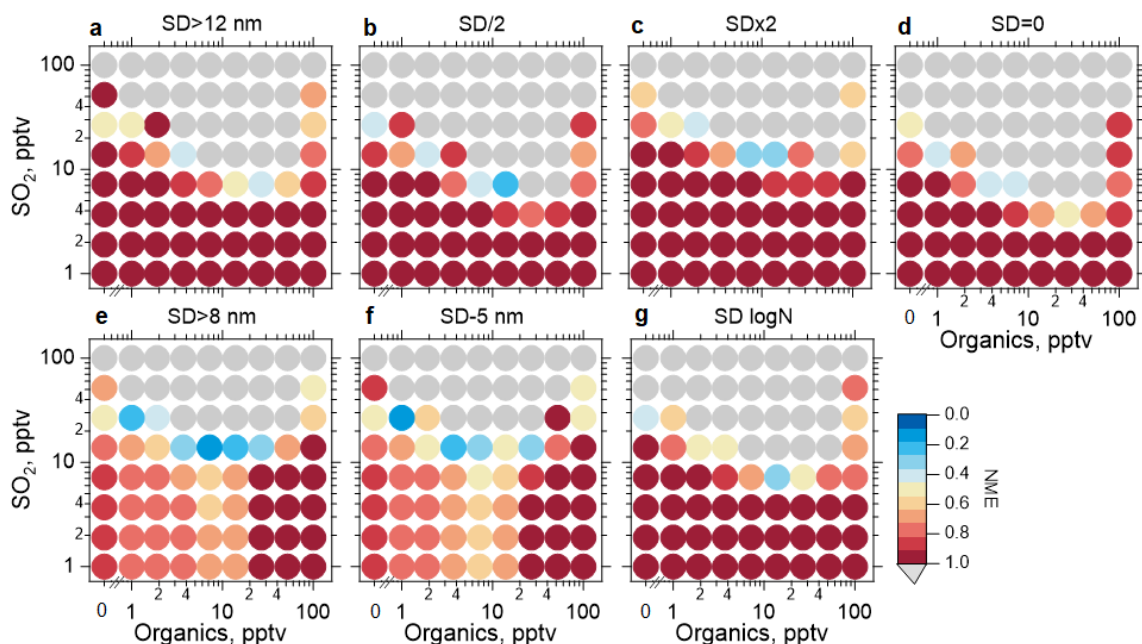

| Size distribution<br>as dndlogd | VEHK     |                        | VEHK+org <sub>gr</sub> |                 |                |
|---------------------------------|----------|------------------------|------------------------|-----------------|----------------|
|                                 | Best NME | SO <sub>2</sub> , pptv | Best NME               | SO <sub>2</sub> | Organics, pptv |
| SD>12 nm                        | 0.48     | 26.8                   | 0.41                   | 7.2             | 26.8           |
| SD=0                            | 0.53     | 26.8                   | 0.39                   | 7.2             | 3.7            |
| SDx2                            | 0.58     | 51.8                   | 0.3                    | 13.9            | 7.2            |
| SD/2                            | 0.4      | 26.8                   | 0.19                   | 7.2             | 13.9           |
| SD - 5 nm                       | 0.5      | 26.8                   | 0.17                   | 26.8            | 1              |
| SD >8 nm                        | 0.54     | 26.8                   | 0.14                   | 13.9            | 7.2            |
| SD logN                         | 0.44     | 26.8                   | 0.34                   | 7.2             | 13.9           |

Figure S52: The effect of the initial background aerosol on the NME in TOMAS for case sd486 (ATom2, 2017-02-03, 03:05:31-03:06:30 UTC) and RIC nucleation scheme. OH at solar zenith angle of 0° was set to 3x10<sup>6</sup> molec cm<sup>-3</sup>.

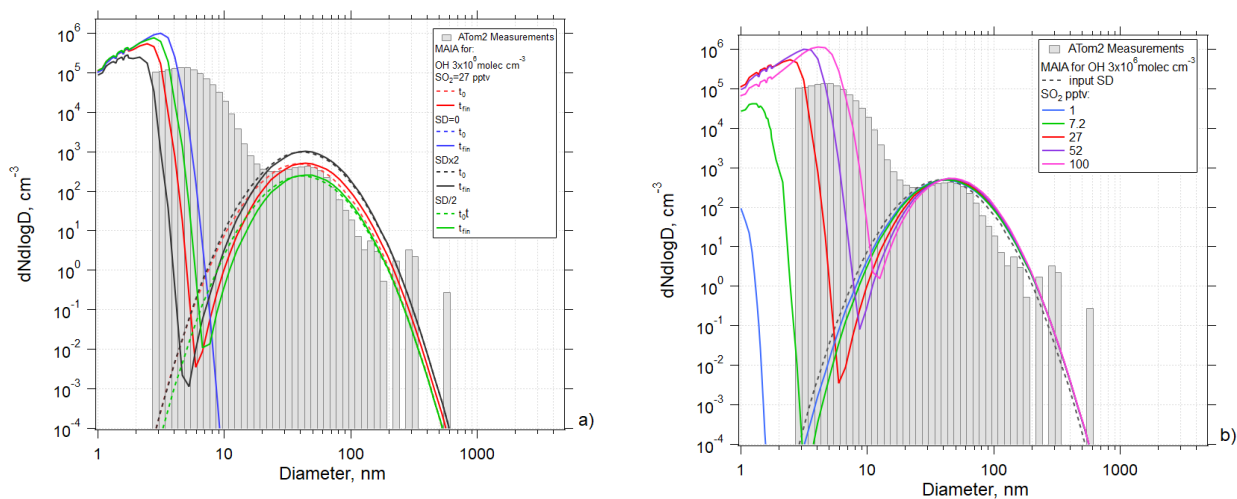

Figure S53: Example of the effect of (a) initial background aerosol and (b) SO<sub>2</sub> mixing ratio on the simulated size distribution (SD as dndlogd) in MAIA for binary neutral and charged nucleation scheme. Simulations were done for ATom2 measurements (2017-02-03, 03:05:31-03:06:30 UTC, sd486) with time since CI 7.3 hrs.

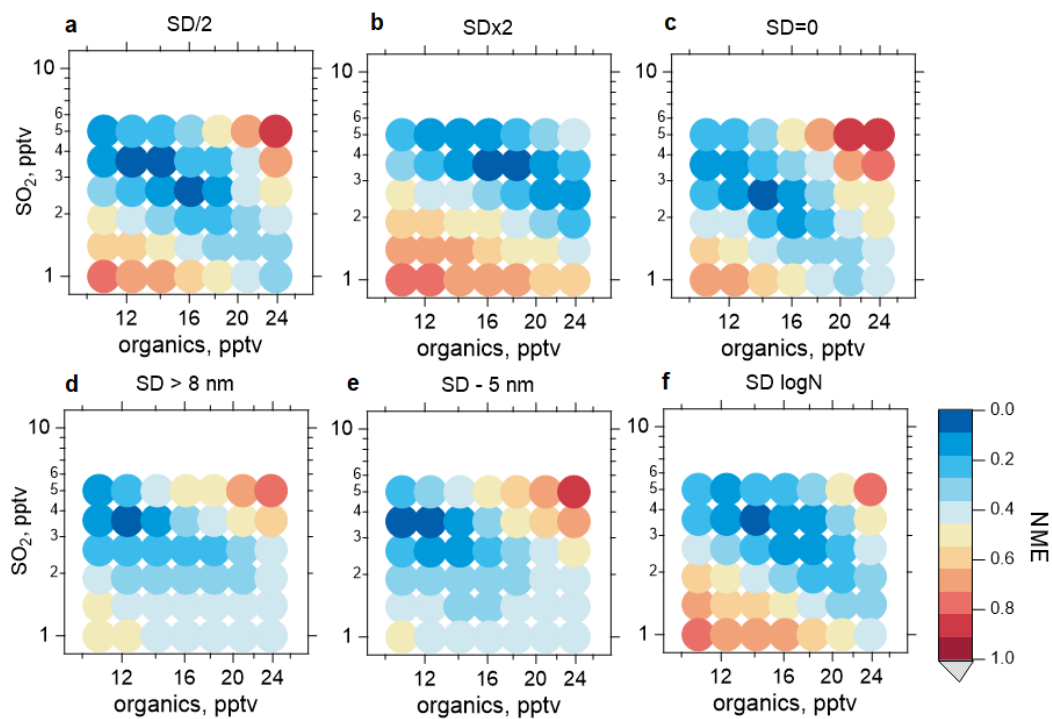

| Initial size distribution | RIC          |                        |                |
|---------------------------|--------------|------------------------|----------------|
|                           | Best NME     | SO <sub>2</sub> , pptv | Organics, pptv |
| SD measured (>12 nm)      | <b>0.043</b> | <b>3.6</b>             | <b>14.1</b>    |
| SD/2                      | <b>0.078</b> | <b>3.6</b>             | <b>12.3</b>    |
| SDx2                      | <b>0.069</b> | <b>3.6</b>             | <b>18.3</b>    |
| SD=0                      | <b>0.071</b> | <b>2.6</b>             | <b>14.1</b>    |
| SD>8nm                    | <b>0.079</b> | <b>5</b>               | <b>9.5</b>     |
| SD - 5 nm                 | <b>0.082</b> | <b>3.6</b>             | <b>12.3</b>    |
| SD logN                   | <b>0.047</b> | <b>3.6</b>             | <b>141</b>     |

Figure S54: The effect of the initial background aerosol on the NME in TOMAS for case sd486 (ATom2, 2017-02-03, 03:05:31-03:06:30 UTC) and RIC nucleation scheme. OH at solar zenith angle of 0° was set to 1x10<sup>6</sup> molec cm<sup>-3</sup>.

#### S4. The impact of OH, $F_{orgnuc}$ in RIC, and initial SD on other cases

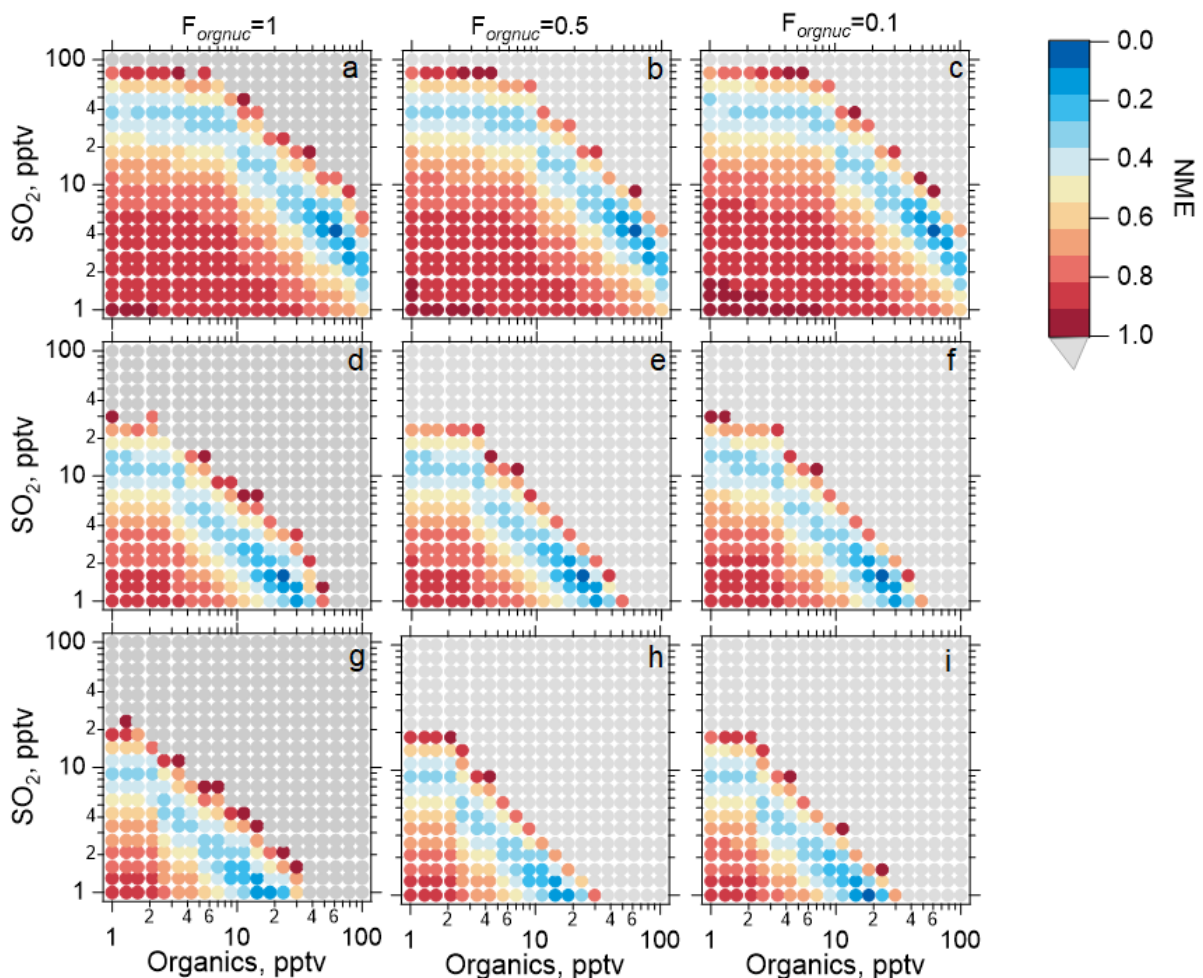

| OH, molec<br>$\text{cm}^{-3}$ | RIC            |                        |                   |                  |                        |                   |                  |                        |                   |
|-------------------------------|----------------|------------------------|-------------------|------------------|------------------------|-------------------|------------------|------------------------|-------------------|
|                               | $F_{orgnuc}=1$ |                        |                   | $F_{orgnuc}=0.5$ |                        |                   | $F_{orgnuc}=0.1$ |                        |                   |
|                               | Best<br>NME    | SO <sub>2</sub> , pptv | Organics,<br>pptv | Best<br>NME      | SO <sub>2</sub> , pptv | Organics,<br>pptv | Best<br>NME      | SO <sub>2</sub> , pptv | Organics,<br>pptv |
| $1 \times 10^6$               | 0.0565         | 4.3                    | 61.6              | 0.0560           | 4.3                    | 61.6              | 0.0538           | 4.3                    | 61.6              |
| $3 \times 10^6$               | 0.0834         | 1.6                    | 23.4              | 0.791            | 1.6                    | 23.4              | 0.0616           | 1.6                    | 23.4              |
| $4.3 \times 10^6$             | 0.1085         | 1                      | 14.4              | 0.1085           | 1                      | 18.3              | 0.0760           | 1                      | 18.3              |

Figure S55: Example of the impact of the scaling factor ( $F_{orgnuc}$ ) of organics and OH in RIC scheme and case study sd461 (ATom 2, 2017-02-04, 02:40:31-02:41:30 UTC). OH at solar zenith angle of  $0^\circ$  was set to 1 (a,b,c), 3 (d,e,f) and  $4.3 \times 10^6 \text{ cm}^{-3}$  (g,h,i) time since convective influence 2.83 hrs and best normalized mean error (NME) between the modeled and measured size distribution: (a,d,g) at  $F_{orgnuc}=1$ , (b,e,h) at  $F_{orgnuc}=0.5$ , (c,f,i) at  $F_{orgnuc}=0.1$ .  $F_{orgnuc}$  represents the fraction of the condensable organic, labeled *BioOxOrg*, that may participate in nucleation by stabilizing the cluster. The color of the circles indicates the value of NME; grey circles indicate NME >1. Varying  $F_{orgnuc}$  does not change results significantly. The NME best stays best for same initial mixing ratios of SO<sub>2</sub> and organics.

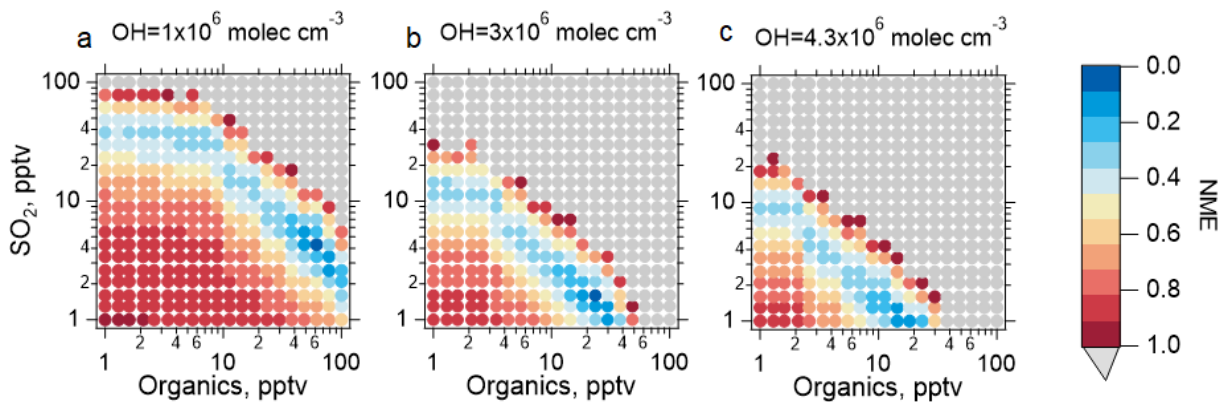

| OH, molec cm <sup>-3</sup> | RIC      |                        |                |
|----------------------------|----------|------------------------|----------------|
|                            | Best NME | SO <sub>2</sub> , pptv | Organics, pptv |
| 1x10 <sup>6</sup>          | 0.0565   | 4.3                    | 61.6           |
| 3x10 <sup>6</sup>          | 0.0834   | 1.6                    | 23.4           |
| 4.3x10 <sup>6</sup>        | 0.1085   | 1                      | 14.4           |

Figure S56: The effect of the OH on the NME in TOMAS for case sd461 (ATom 2, 2017-02-04, 02:40:31-02:41:30 UTC) and RIC nucleation scheme. OH at solar zenith angle of 0° was set to 1, 3 and 4.3x10<sup>6</sup> molec cm<sup>-3</sup>.

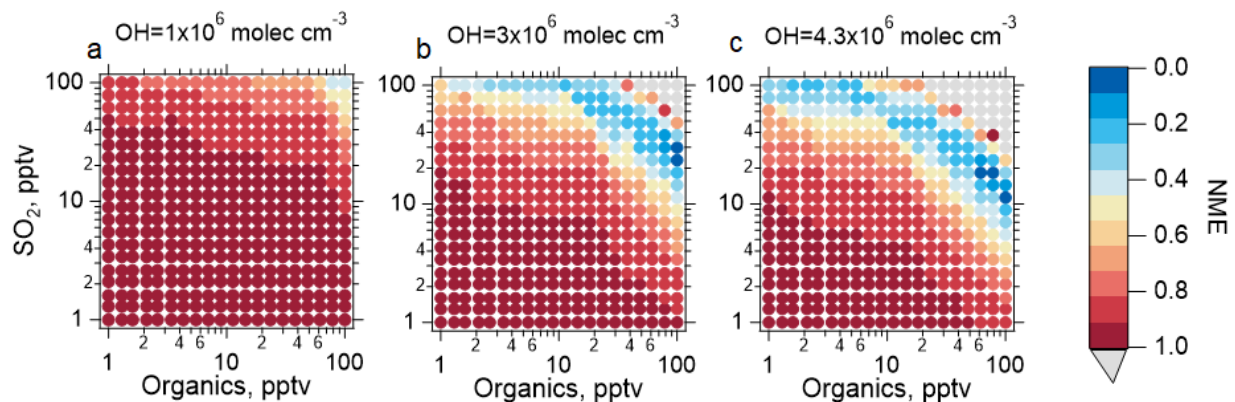

| OH, molec cm <sup>-3</sup> | RIC      |                        |                |
|----------------------------|----------|------------------------|----------------|
|                            | Best NME | SO <sub>2</sub> , pptv | Organics, pptv |
| 1x10 <sup>6</sup>          | 0.38     | 100                    | 78.5           |
| 3x10 <sup>6</sup>          | 0.08     | 23.4                   | 100            |
| 4.3x10 <sup>6</sup>        | 0.06     | 18.3                   | 78.5           |

Figure S57: The effect of OH on the NME in TOMAS for case sd491 (ATom 2, 2017-02-40, 03:10:31-03:11:30 UTC) and RIC nucleation scheme. OH at solar zenith angle of 0° was set to 1, 3 and 4.3x10<sup>6</sup> molec cm<sup>-3</sup>.

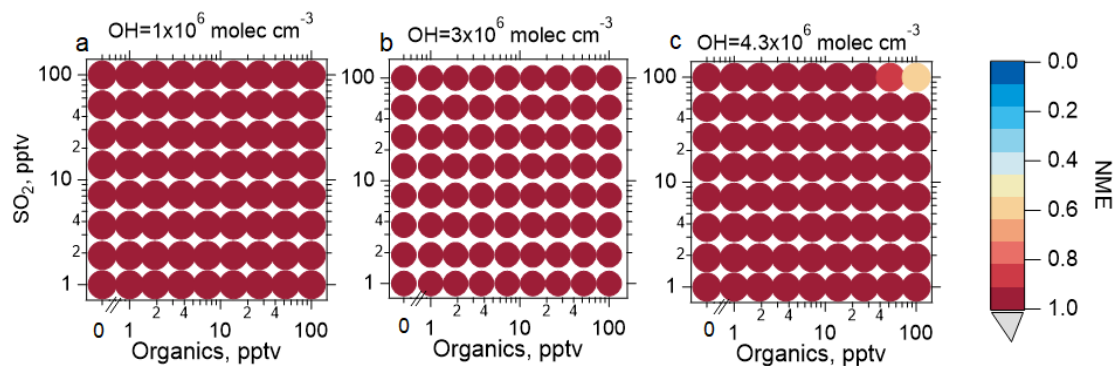

| OH, molec cm <sup>-3</sup> | VEHK     |                        | VEHK+org <sub>gr</sub> |                        |                |
|----------------------------|----------|------------------------|------------------------|------------------------|----------------|
|                            | Best NME | SO <sub>2</sub> , pptv | Best NME               | SO <sub>2</sub> , pptv | Organics, pptv |
| 1x10 <sup>6</sup>          | 0.957    | 100                    | 0.956                  | 1.9                    | 100            |
| 3x10 <sup>6</sup>          | 0.956    | 100                    | 0.911                  | 100                    | 100            |
| 4.3x10 <sup>6</sup>        | 0.953    | 100                    | 0.622                  | 100                    | 100            |

Figure S58: The effect of OH on the NME in TOMAS for case sd491 (ATom 2, 2017-02-40, 03:10:31-03:11:30 UTC) and VEHK nucleation scheme with and without organics added for initial growth. OH at solar zenith angle of 0° was set to 1, 3 and 4.3x10<sup>6</sup> molec cm<sup>-3</sup>.

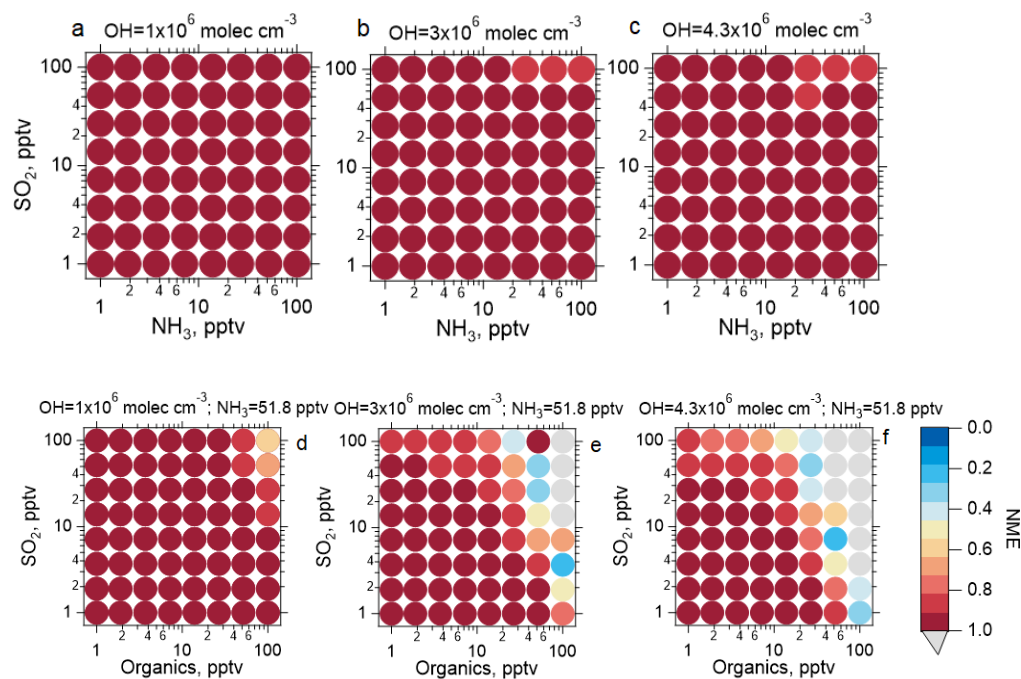

| OH, molec cm <sup>-3</sup> | NAPA     |                        |                        | NAPA+org <sub>gr</sub> |                 |                        |                |
|----------------------------|----------|------------------------|------------------------|------------------------|-----------------|------------------------|----------------|
|                            | Best NME | SO <sub>2</sub> , pptv | NH <sub>3</sub> , pptv | Best NME               | SO <sub>2</sub> | NH <sub>3</sub> , pptv | Organics, pptv |
| 1x10 <sup>6</sup>          | 0.93     | 100                    | 26.8                   | 0.58                   | 100             | 51.8                   | 100            |
| 3x10 <sup>6</sup>          | 0.89     | 100                    | 26.8                   | 0.25                   | 3.7             | 51.8                   | 100            |
| 4.3x10 <sup>6</sup>        | 0.83     | 100                    | 26.8                   | 0.27                   | 7.2             | 51.8                   | 51.8           |

Figure S59: The effect of OH on the NME in TOMAS for case sd491 (ATom 2, 2017-02-40, 03:10:31-03:11:30 UTC) and NAPA nucleation scheme with and without organics added for initial growth. OH at solar zenith angle of 0° was set to 1, 3 and 4.3x10<sup>6</sup> molec cm<sup>-3</sup>.



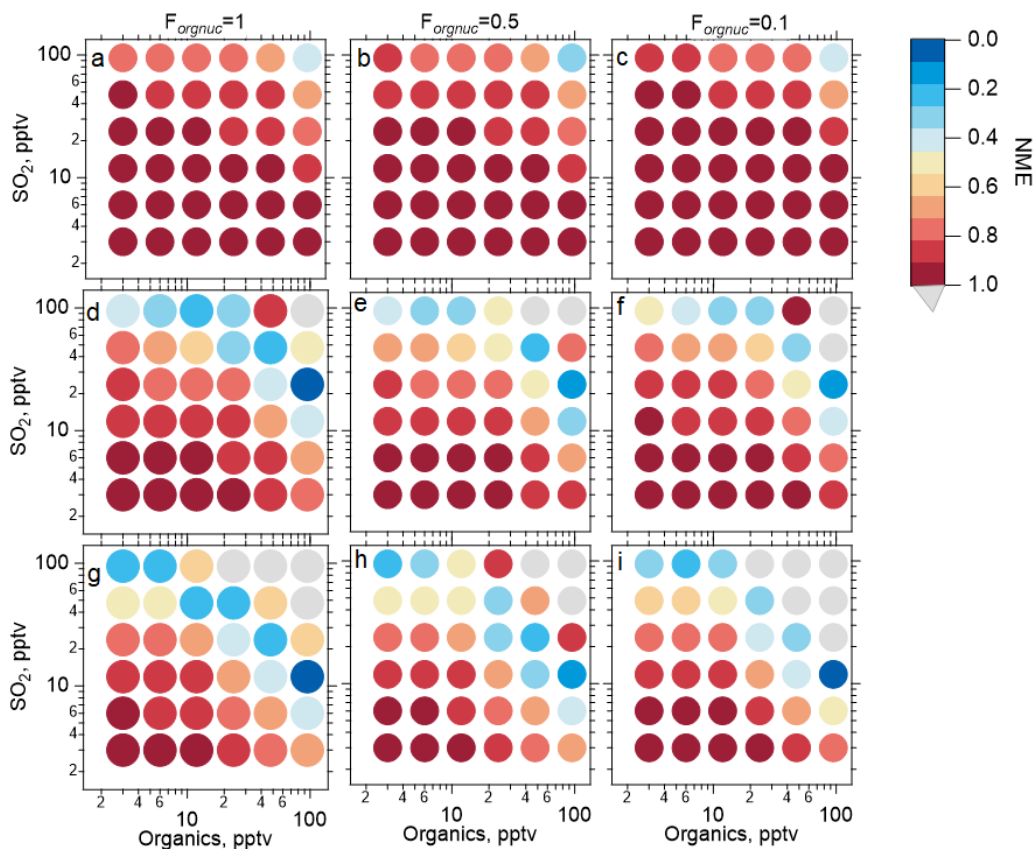

| OH,<br>molec cm <sup>-3</sup> | RIC                     |                        |                   |                           |                           |                   |                           |                           |                   |
|-------------------------------|-------------------------|------------------------|-------------------|---------------------------|---------------------------|-------------------|---------------------------|---------------------------|-------------------|
|                               | F <sub>organuc</sub> =1 |                        |                   | F <sub>organuc</sub> =0.5 |                           |                   | F <sub>organuc</sub> =0.1 |                           |                   |
|                               | Best<br>NME             | SO <sub>2</sub> , pptv | Organics,<br>pptv | Best<br>NME               | SO <sub>2</sub> ,<br>pptv | Organics,<br>pptv | Best<br>NME               | SO <sub>2</sub> ,<br>pptv | Organics,<br>pptv |
| 1x10 <sup>6</sup>             | 0.42                    | 95                     | 95                | 0.33                      | 95                        | 95                | 0.4                       | 95                        | 95                |
| 3x10 <sup>6</sup>             | 0.09                    | 11.9                   | 95                | 0.15                      | 23.8                      | 95                | 0.18                      | 23.8                      | 95                |
| 4.3x10 <sup>6</sup>           | 0.06                    | 23.8                   | 95                | 0.13                      | 11.9                      | 95                | 0.09                      | 11.9                      | 95                |

Figure S60: Example of the impact of the scaling factor ( $F_{organuc}$ ) of organics and OH in RIC scheme and case study sd491 (ATom 2, 2017-02-40, 03:10:31-03:11:30 UTC). OH at solar zenith angle of  $0^\circ$  was set to 1 (a,b,c), 3 (d,e,f) and  $4.3 \times 10^6$  cm<sup>-3</sup> (g,h,i) time since convective influence 0.4 hr and best normalized mean error (NME) between the modeled and measured size distribution: (a,d,g) at  $F_{organuc}=1$ , (b,e,h) at  $F_{organuc}=0.5$ , (c,f,i) at  $F_{organuc}=0.1$ .  $F_{organuc}$  represents the fraction of the condensable organic, labeled *BioOxOrg*, that may participate in nucleation by stabilizing the cluster. The color of the circles indicates the value of NME; grey circles indicate NME >1. Varying  $F_{organuc}$  does not change results significantly. The best NME stays best for same initial mixing ratios of SO<sub>2</sub> and organics. Notice different resolution than in Figure S52 for RIC scheme.

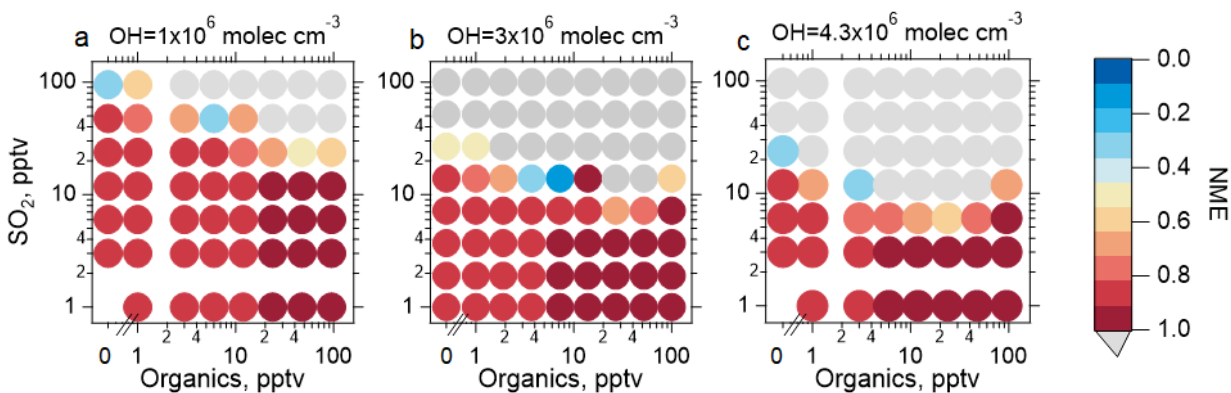

| OH, molec cm <sup>-3</sup> | VEHK     |                        | VEHK+org <sub>gr</sub> |                 |                |
|----------------------------|----------|------------------------|------------------------|-----------------|----------------|
|                            | Best NME | SO <sub>2</sub> , pptv | Best NME               | SO <sub>2</sub> | Organics, pptv |
| 1x10 <sup>6</sup>          | 0.35     | 95                     | 0.31                   | 47.5            | 6              |
| 3x10 <sup>6</sup>          | 0.52     | 26.8                   | 0.16                   | 13.9            | 7.2            |
| 4.3x10 <sup>6</sup>        | 0.3      | 24                     | 0.35                   | 12              | 3              |

Figure S61: Results of simulations using the TOMAS box model and VEHK nucleation scheme with and without organics added for initial particle growth for case sd448 (ATom 2, 2017-02-04, 02:27:31-02:28:30 UTC) where OH has been varied between 1 and 4.3x10<sup>6</sup> molec cm<sup>-3</sup> (a-c). d) Size distribution for the corresponding best NME of each OH setting as in (a-c). Best NME results are summarized in the table. and NME results in the table. OH settings of 1 and 4x10<sup>6</sup> molec cm<sup>-3</sup> simulated at lower resolution. No simulations done for SO<sub>2</sub>=1pptv and no organics for OH1 and 4.3x10<sup>6</sup> molec cm<sup>-3</sup>.

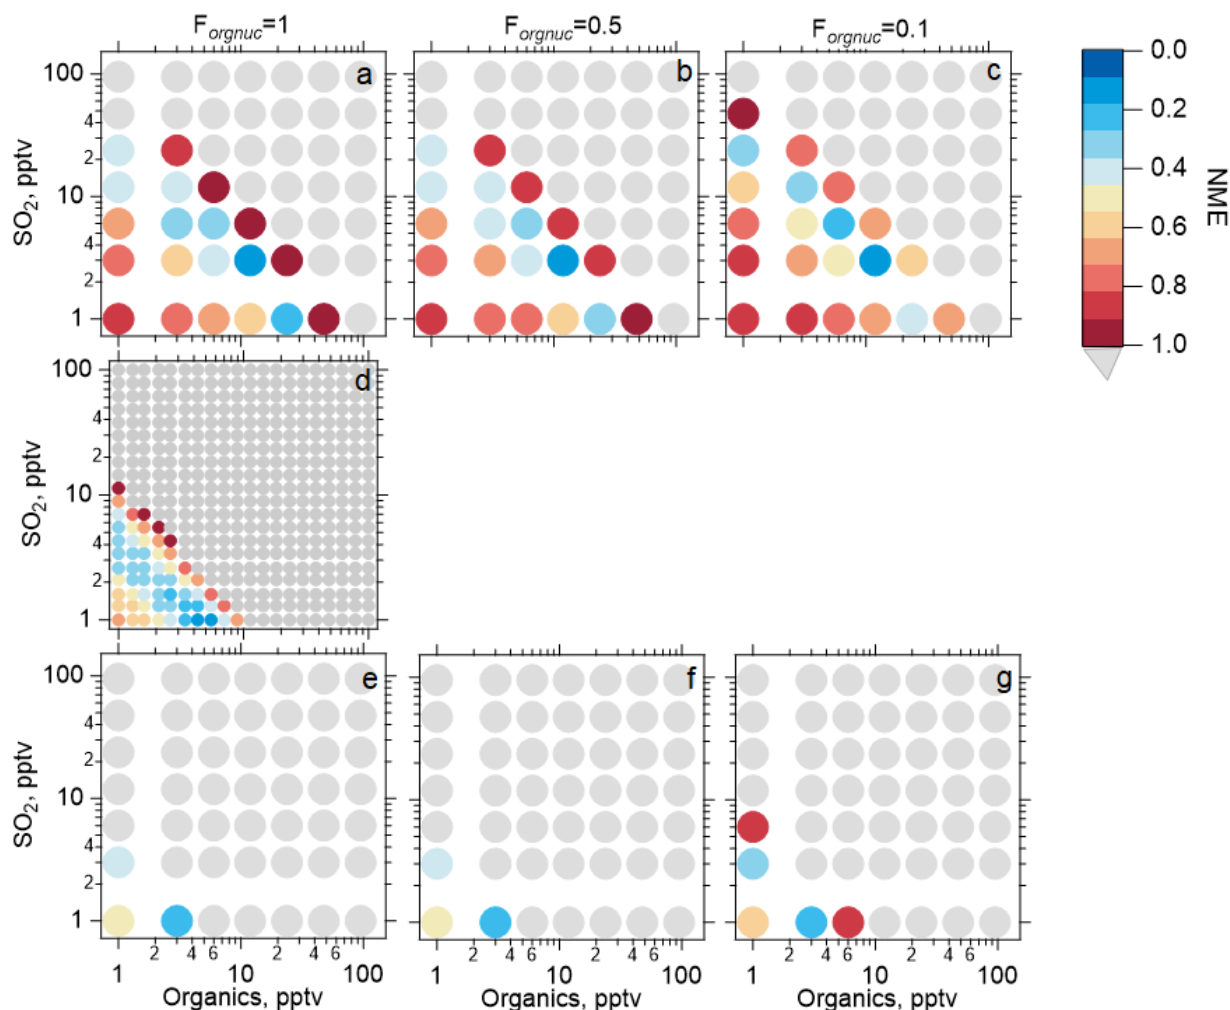

| OH, molec<br>$cm^{-3}$ | RIC            |                  |                   |                  |                  |                   |                  |                  |                   |
|------------------------|----------------|------------------|-------------------|------------------|------------------|-------------------|------------------|------------------|-------------------|
|                        | $F_{orgnuc}=1$ |                  |                   | $F_{orgnuc}=0.5$ |                  |                   | $F_{orgnuc}=0.1$ |                  |                   |
|                        | Best<br>NME    | $SO_2$ ,<br>pptv | Organics,<br>pptv | Best<br>NME      | $SO_2$ ,<br>pptv | Organics,<br>pptv | Best<br>NME      | $SO_2$ ,<br>pptv | Organics,<br>pptv |
| $1 \times 10^6$        | 0.16           | 3                | 12                | 0.15             | 3                | 12                | 0.14             | 3                | 12                |
| $3 \times 10^6$        | 0.16           | 1                | 4.3               | n/a              | n/a              | n/a               | n/a              | n/a              | n/a               |
| $4.3 \times 10^6$      | 0.26           | 1                | 3                 | 0.26             | 1                | 3                 | 0.18             | 1                | 3                 |

Figure S62: Example of the impact of the scaling factor ( $F_{orgnuc}$ ) of organics and OH in RIC scheme and case study sd448 (ATom 2, 2017-02-04, 02:27:31-02:28:30 UTC). OH at solar zenith angle of  $0^\circ$  was set to 1 (a,b,c), 3 (d) and  $4.3 \times 10^6$  molec  $cm^{-3}$  (e,f,g) time since convective influence 9.08 hrs and best normalized mean error (NME) between the modeled and measured size distribution: (a,d,e) at  $F_{orgnuc}=1$ , (b,f) at  $F_{orgnuc}=0.5$ , (c,g) at  $F_{orgnuc}=0.1$ .  $F_{orgnuc}$  represents the fraction of the condensable organic, labeled *BioOxOrg*, that may participate in nucleation by stabilizing the cluster. The color of the circles indicates the value of NME; grey circles indicate NME > 1. Varying  $F_{orgnuc}$  does not change results significantly. The NME best stays best for same initial mixing ratios of  $SO_2$  and organics. No simulations were done for  $F_{orgnuc}=0.5$  and  $F_{orgnuc}=0.1$  at OH set to  $3 \times 10^6$  molec  $cm^{-3}$ .

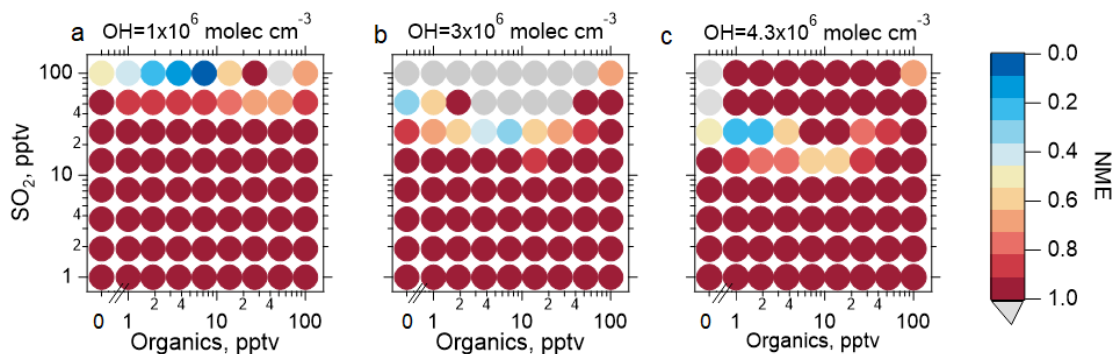

| OH, molec cm <sup>-3</sup> | VEHK     |                        | VEHK+org <sub>gr</sub> |                 |                |
|----------------------------|----------|------------------------|------------------------|-----------------|----------------|
|                            | Best NME | SO <sub>2</sub> , pptv | Best NME               | SO <sub>2</sub> | Organics, pptv |
| 1x10 <sup>6</sup>          | 0.52     | 100                    | 0.09                   | 100             | 7.2            |
| 3x10 <sup>6</sup>          | 0.35     | 52                     | 0.32                   | 27              | 7.2            |
| 4.3x10 <sup>6</sup>        | 0.46     | 27                     | 0.18                   | 27              | 1              |

Figure S63: Results of simulations using the TOMAS box model and VEHK nucleation scheme with and without organics added for initial particle growth for case sd477 (ATom2, 2017-02-03, 03:05:31-03:06:30 UTC) where OH has been varied between 1 and 4.3x10<sup>6</sup> molec cm<sup>-3</sup> (a-c). Best NME results are summarized in the table. and NME results in the table. OH settings of 1 and 4x10<sup>6</sup> molec cm<sup>-3</sup> simulated at lower resolution.

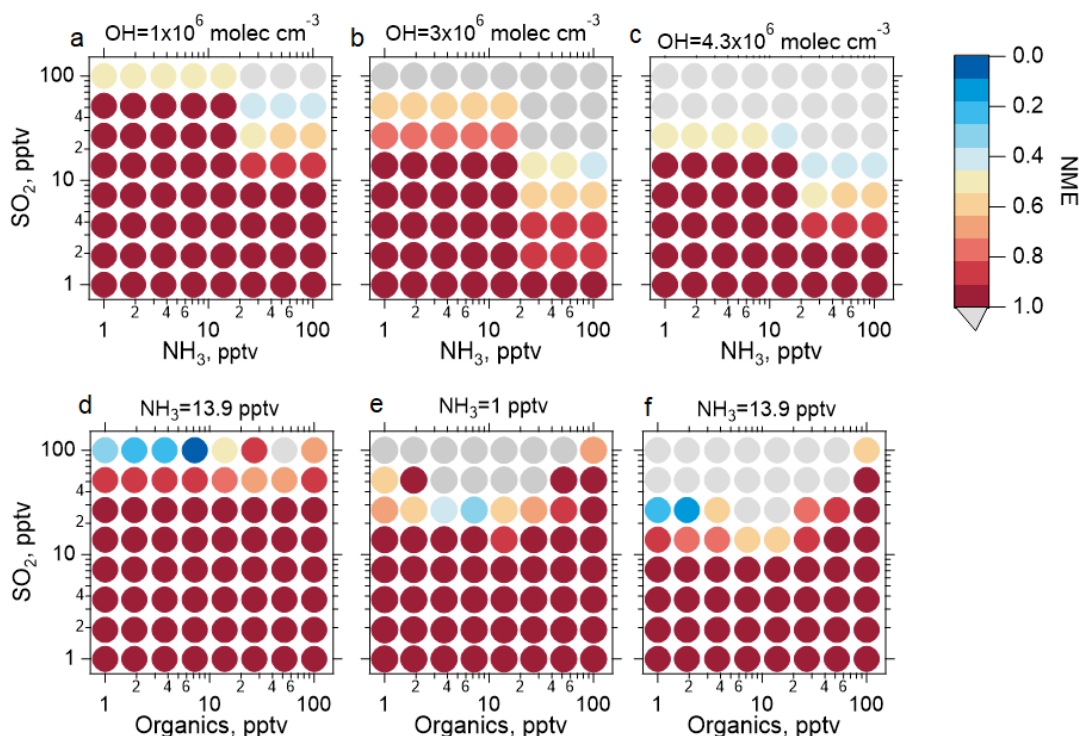

| OH, molec cm <sup>-3</sup> | NAPA     |                        |                        | NAPA+org <sub>gr</sub> |                 |                        |                |
|----------------------------|----------|------------------------|------------------------|------------------------|-----------------|------------------------|----------------|
|                            | Best NME | SO <sub>2</sub> , pptv | NH <sub>3</sub> , pptv | Best NME               | SO <sub>2</sub> | NH <sub>3</sub> , pptv | Organics, pptv |
| 1x10 <sup>6</sup>          | 0.42     | 51.8                   | 100                    | 0.08                   | 100             | 13.9                   | 7.2            |
| 3x10 <sup>6</sup>          | 0.45     | 13.9                   | 100                    | 0.32                   | 26.8            | 1                      | 7.2            |
| 4.3x10 <sup>6</sup>        | 0.42     | 13.9                   | 100                    | 0.18                   | 26.8            | 13.9                   | 1.9            |

Figure S64: The effect of OH on the NME in TOMAS for case sd477 (ATom 2, 2017-02-04, 02:56:31-02:57:30 UTC) and NAPA nucleation scheme with and without organics added for initial growth. OH at solar zenith angle of 0° was set to 1, 3 and 4.3x10<sup>6</sup> molec cm<sup>-3</sup>.

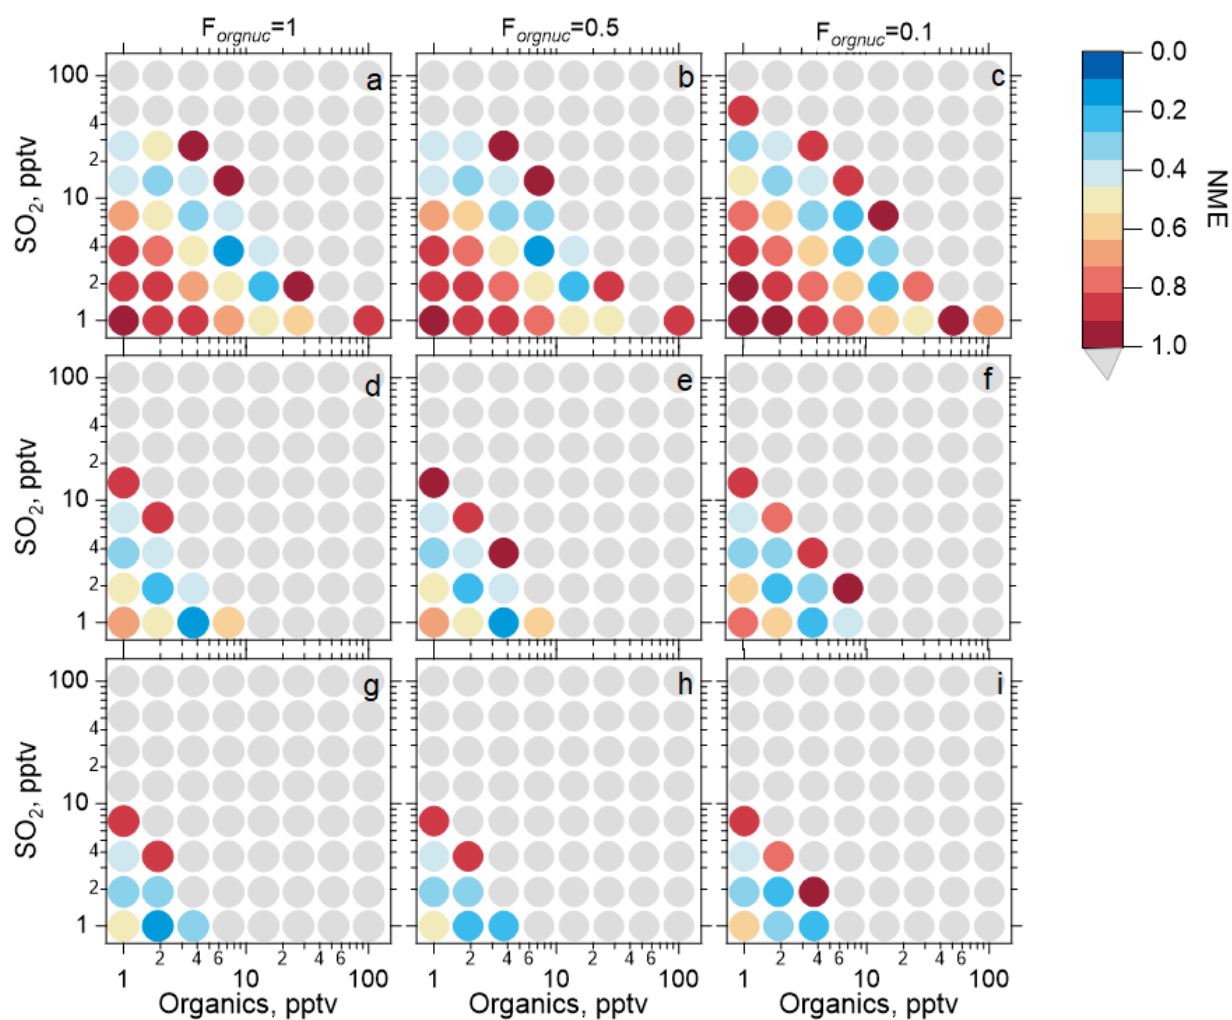

| OH, molec<br>cm <sup>-3</sup> | RIC                     |                        |                   |                           |                        |                   |                           |                        |                   |
|-------------------------------|-------------------------|------------------------|-------------------|---------------------------|------------------------|-------------------|---------------------------|------------------------|-------------------|
|                               | F <sub>organuc</sub> =1 |                        |                   | F <sub>organuc</sub> =0.5 |                        |                   | F <sub>organuc</sub> =0.1 |                        |                   |
|                               | Best<br>NME             | SO <sub>2</sub> , pptv | Organics,<br>pptv | Best<br>NME               | SO <sub>2</sub> , pptv | Organics,<br>pptv | Best<br>NME               | SO <sub>2</sub> , pptv | Organics,<br>pptv |
| 1x10 <sup>6</sup>             | 0.12                    | 3.7                    | 7.2               | 0.15                      | 3.7                    | 7.2               | 0.23                      | 7.2                    | 7.2               |
| 3x10 <sup>6</sup>             | 0.11                    | 1                      | 3.7               | 0.14                      | 1                      | 3.7               | 0.24                      | 1                      | 3.7               |
| 4.3x10 <sup>6</sup>           | 0.16                    | 1                      | 1.9               | 0.19                      | 1                      | 1.9               | 0.21                      | 1.9                    | 1.9               |

Figure S65: Example of the impact of the scaling factor ( $F_{organuc}$ ) of organics and OH in RIC scheme and case study sd477 (ATom 2, 2017-02-04, 02:56:31-02:57:30 UTC). OH at solar zenith angle of  $0^\circ$  was set to 1 (a,b,c), 3 (d,e,f) and  $4.3 \times 10^6$  cm<sup>-3</sup> (g,h,i) time since convective influence 10.5 hrs and best normalized mean error (NME) between the modeled and measured size distribution: (a,d,g) at  $F_{organuc}=1$ , (b,e,h) at  $F_{organuc}=0.5$ , (c,f,i) at  $F_{organuc}=0.1$ .  $F_{organuc}$  represents the fraction of the condensable organic, labeled *BioOxOrg*, that may participate in nucleation by stabilizing the cluster. The color of the circles indicates the value of NME; grey circles indicate NME >1. Varying  $F_{organuc}$  does not change results significantly. The NME best stays best for same initial mixing ratios of SO<sub>2</sub> and organics.



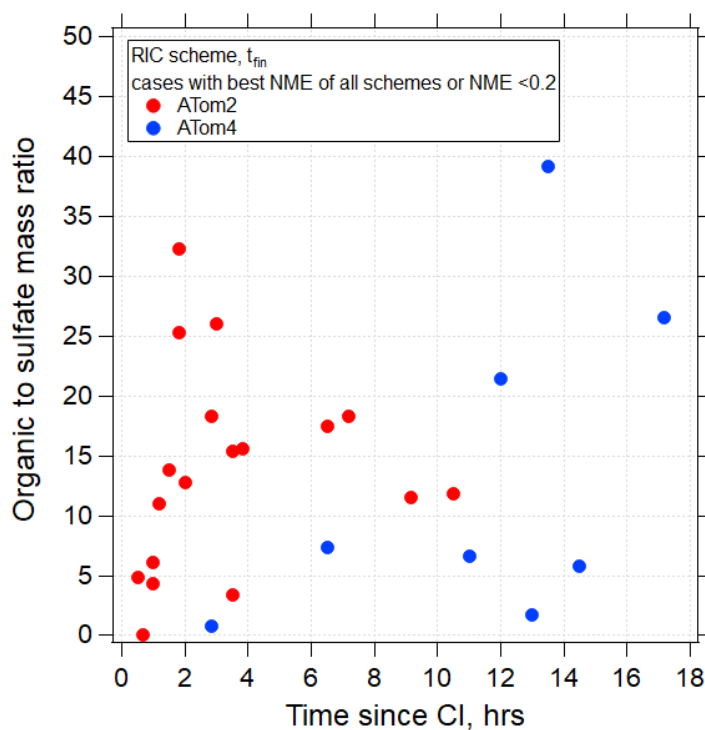

Figure S66: The simulated organic and sulfate mass ratio for particles with diameters below 12 nm for ATom-2 and -4 at the point of measurement by the aircraft ( $t_{fin}$ ) is plotted to the time since convective influence (CI). TOMAS simulations were performed using RIC scheme. A comparison of the production rate of organics to sulfate suggests that the composition of small particles might be dominated by organics rather than sulfate.

## References

- Clegg, S. L., Rard, J. A., and Pitzer, K. S.: Thermodynamic properties of 0–6 mol kg<sup>-1</sup> aqueous sulfuric acid from 273.15 to 328.15 K, *J. Chem. Soc., Faraday Trans.*, 90, 1875–1894, doi:10.1039/FT9949001875, 1994.
- Curtius J., Froyd, K.D., Lovejoy, E.R., Cluster ion thermal decomposition (I): Experimental kinetics study and ab initio calculations for HSO<sub>4</sub>-(H<sub>2</sub>SO<sub>4</sub>)<sub>x</sub>(HNO<sub>3</sub>)<sub>y</sub>, *J. Phys. Chem. A*, 105, 48, 10867-10873, 2001.
- Dunne, E. M., Gordon, H., Kürten, A., Almeida, J., Duplissy, J., Williamson, C., Ortega, I. K., Pringle, K. J., Adamov, A., Baltensperger, U., Barmet, P., Benduhn, F., Bianchi, F., Breitenlechner, M., Clarke, A., Curtius, J., Dommen, J., Donahue, N. M., Ehrhart, S., Flagan, R. C., Franchin, A., Guida, R., Hakala, J., Hansel, A., Heinritzi, M., Jokinen, T., Kangasluoma, J., Kirkby, J., Kulmala, M., Kupc, A., Lawler, M. J., Lehtipalo, K., Makhmutov, V., Mann, G., Mathot, S., Merikanto, J., Miettinen, P., Nenes, A., Onnela, A., Rap, A., Reddington, C. L. S., Riccobono, F., Richards, N. A. D., Rissanen, M. P., Rondo, L., Sarnela, N., Schobesberger, S., Sengupta, K., Simon, M., Sipilä, M., Smith, J. N., Stozkhov, Y., Tomé, A., Tröstl, J., Wagner, P. E., Wimmer, D., Winkler, P. M., Worsnop, D. R., and Carslaw, K. S.: Global atmospheric particle formation from CERN CLOUD measurements, *Science*, 354, 1119-1124, 10.1126/science.aaf2649, 2016.

- Froyd, K. D. and Lovejoy, E. R.: Experimental thermodynamics of cluster ions composed of  $\text{H}_2\text{SO}_4$  and  $\text{H}_2\text{O}$ . 1. Positive Ions, *J. Phys. Chem. A*, 107, 9800–9811, 2003.
- Gao, R. S., Rosenlof, K. H., Fahey, D. W., Wennberg, P. O., Hintsala, E. J., and Hanisco, T. F.: OH in the tropical upper troposphere and its relationships to solar radiation and reactive nitrogen, *J. Atmos. Chem.*, 71, 55–64, 10.1007/s10874-014-9280-2, 2014.
- Giauque, W. F., Hornung, E. W., Kunzler, J. E., and Rubin, T. T.: The thermodynamic properties of aqueous sulfuric acid solutions and hydrates from 15 to 300 K, *Am. Chem. Soc. J.*, 82, 62–70, 1960.
- Hanson, D., and Lovejoy, E. R., Measurement of the thermodynamics of the hydrated dimer and trimer of sulfuric acid. *J. Phys. Chem. A*, 110, 9525–9528. doi:10.1021/jp062844w, 2006.
- Hodshire, A. L., Bian, Q., Ramnarine, E., Lonsdale, C. R., Alvarado, M. J., Kreidenweis, S. M., et al. (2019). More than emissions and chemistry: Fire size, dilution, and background aerosol also greatly influence near-field biomass burning aerosol aging. *J. Geophys. Res.: Atmos.*, 124, 5589–5611. <https://doi.org/10.1029/2018JD029674>, 2019.
- Kazil, J., and Lovejoy, E. R.: A semi-analytical method for calculating rates of new sulfate aerosol formation from the gas phase, *Atmos. Chem. Phys.*, 7, 3447–3459, 10.5194/acp-7-3447-2007, 2007.
- Lovejoy, E. R., Hanson, D. R., and Huey, L. G.: Kinetics and products of the gas-phase reaction of  $\text{SO}_3$  with water, *J. Phys. Chem.*, 100, 19 911–19 916, doi:10.1021/jp962414d, 1996.
- Lovejoy, E. R., and J. Curtius, Cluster ion thermal decomposition (II): Master equation modeling in the low-pressure limit and fall-off regions—Bond energies for  $\text{HSO}_4(\text{H}_2\text{SO}_4)_x(\text{HNO}_3)_y$ , *J. Phys. Chem. A*, 105, 10,874–10,883, 2001.
- Lovejoy, E. R., Curtius, J., and Froyd, K. D.: Atmospheric ion-induced nucleation of sulfuric acid and water, *J. Geophys. Res.*, 109, 10.1029/2003jd004460, 2004.
- Napari, I., Noppel, M., Vehkamäki, H., and Kulmala, M.: Parametrization of ternary nucleation rates for  $\text{H}_2\text{SO}_4\text{-NH}_3\text{-H}_2\text{O}$  vapors, *J. Geophys. Res.*, 107, AAC 6-1-AAC 6-6, 10.1029/2002jd002132, 2002.
- O'Brien, K., The theory of cosmic-ray and high-energy solar-particle transport in the atmosphere, in *Proceedings of the 7th International Symposium on the Natural Radiation Environment*, edited by J. P. McLaughlin, S. E. Simopoulos, and F. Steinhusler, pp. 29–44, Elsevier, New York, 2005.
- Riccobono, F., Schobesberger, S., Scott, C. E., Dommen, J., Ortega, I. K., Rondo, L., Almeida, J., Amorim, A., Bianchi, F., Breitenlechner, M., David, A., Downard, A., Dunne, E. M., Duplissy, J., Ehrhart, S., Flagan, R. C., Franchin, A., Hansel, A., Junninen, H., Kajos, M., Keskinen, H., Kupc, A., Kürten, A., Kvashin, A. N., Laaksonen, A., Lehtipalo, K., Makhmutov, V., Mathot, S., Nieminen, T., Onnela, A., Petäjä, T., Praplan, A. P., Santos, F. D., Schallhart, S., Seinfeld, J. H., Sipilä, M., Spracklen, D. V., Stozhkov, Y., Stratmann, F., Tomé, A., Tsagkogeorgas, G., Vaattovaara, P., Viisanen, Y., Vrtala, A., Wagner, P. E., Weingartner, E., Wex, H., Wimmer, D., Carslaw, K. S., Curtius, J., Donahue, N. M., Kirkby, J., Kulmala, M., Worsnop, D. R., and Baltensperger, U.: Oxidation products of biogenic emissions contribute to nucleation of atmospheric particles, *Science*, 344, 717–721, 10.1126/science.1243527, 2014.
- Seinfeld, J. H., and Pandis, S. N.: *Atmospheric Chemistry and Physics: From Air Pollution to Climate Change*, (Wiley, 1998), 2006.
- Stevens, B., G. Feingold, W. R. Cotton, and R. L. Walko, 1996: Elements of the microphysical structure of numerically simulated nonprecipitating stratocumulus. *J. Atmos. Sci.*, 53, 980–1006, [https://doi.org/10.1175/1520-0469\(1996\)053<0980:EOTMSO>2.0.CO;2](https://doi.org/10.1175/1520-0469(1996)053<0980:EOTMSO>2.0.CO;2).
- Vehkamäki, H., Kulmala, M., Napari, I., Lehtinen, K. E. J., Timmreck, C., Noppel, M., and Laaksonen, A.: An improved parameterization for sulfuric acid–water nucleation rates for tropospheric and stratospheric conditions, *J. Geophys. Res.*, 107, AAC 3-1-AAC 3-10, 10.1029/2002jd002184, 2002.

- Weigel, R., Borrmann, S., Kazil, J., Minikin, A., Stohl, A., Wilson, J. C., Reeves, J. M., Kunkel, D., de Reus, M., Frey, W., Lovejoy, E. R., Volk, C. M., Viciani, S., D'Amato, F., Schiller, C., Peter, T., Schlager, H., Cairo, F., Law, K. S., Shur, G. N., Belyaev, G. V., and Curtius, J.: In situ observations of new particle formation in the tropical upper troposphere: the role of clouds and the nucleation mechanism, *Atmos. Chem. Phys.*, 11, 9983-10010, 10.5194/acp-11-9983-2011, 2011.
- Williamson, C. J., Kupc, A., Axisa, D., Bilsback, K. R., Bui, T., Campuzano-Jost, P., Dollner, M., Froyd, K. D., Hodshire, A. L., Jimenez, J. L., Kodros, J. K., Luo, G., Murphy, D. M., Nault, B. A., Ray, E. A., Weinzierl, B., Wilson, J. C., Yu, F., Yu, P., Pierce, J. R., and Brock, C. A.: A large source of cloud condensation nuclei from new particle formation in the tropics, *Nature*, 574, 399-403, 10.1038/s41586-019-1638-9, 2019.
- Yu, F., Luo, G., Nadykto, A. B., and Herb, J.: Impact of temperature dependence on the possible contribution of organics to new particle formation in the atmosphere, *Atmos. Chem. Phys.*, 17, 4997-5005, 10.5194/acp-17-4997-2017, 2017.
